# Supplementary material for: Synthesis and crystal packing of perylene-derivatives with extreme sterically demanding pentaphenylbenzene bay-substituents
Source: Royal Society of Chemistry journal article supplement (doi:10.1039/d0cc07773a), 2020-12-18
Supplement: d0cc07773a1.pdf [file d0cc07773a1.pdf]

**Supporting Information for:**

Synthesis and Crystal Packing of Perylene-derivatives with extreme  
sterically demanding Pentaphenylbenzene *bay*-Substituents

- S1. Synthetic details
- S2. Experimental Data
- S3. NMR- and mass-spectra
- S4. UV/Vis and fluorescence spectra
- S5. Crystal structure analysis
- S6. References

## S1. Synthetic details

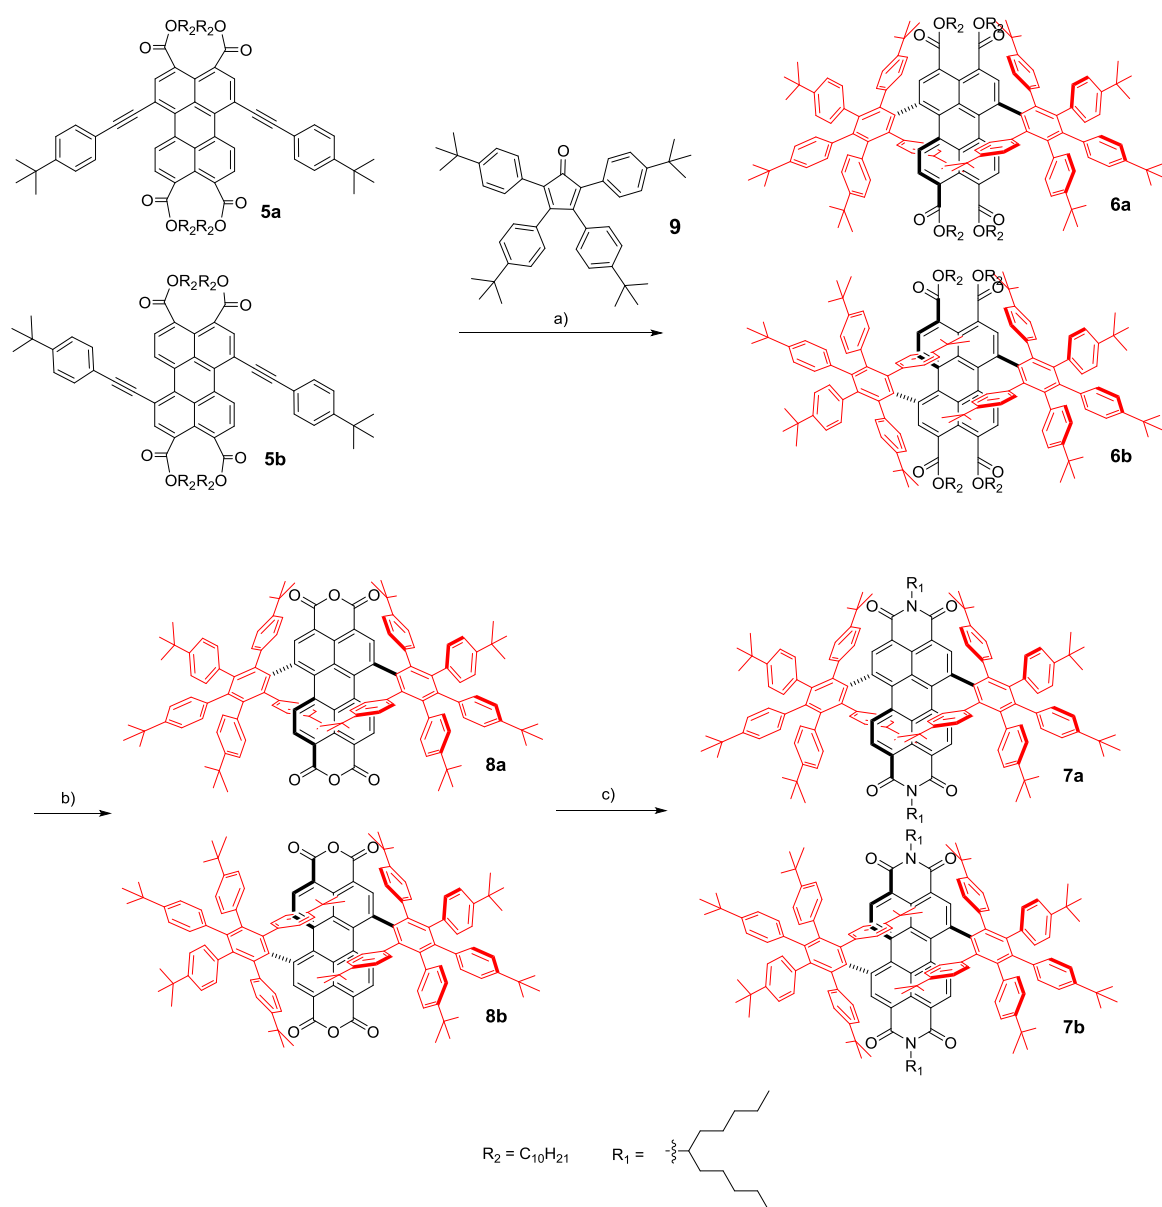

**Scheme 1** Detailed synthesis of PDI-PPBs **7**; a) tetrakis-(*tert*-butyl)tetracyclone **9**, toluene, 220 °C, 24 h, yields: 62% (**6a**), 72% (**6b**); e) *p*-toluenesulfonic-acid, toluene:dodecane (1:5), 95 °C, 24 h, yields: 91% (**8a**), 89% (**8b**); f) 6-undecylamine, imidazole, 140 °C, 1 h, yields: 74% (**7a**), 74% (**7b**).

## S2. Experimental Data

### Materials and Methods

Chemicals were purchased from Sigma-Aldrich and used without any further purification. Solvents were distilled prior to usage. Thin layer chromatography (TLC) was performed on Merck silica gel 60 F524, detected by UV-light (254 nm, 366 nm). Plug chromatography and column chromatography were performed on Macherey-Nagel silica gel 60 M (deactivated, 230–400 mesh, 0.04–0.063 mm). NMR spectra were recorded on a Bruker Avance 400 ( $^1\text{H}$ : 400 MHz,  $^{13}\text{C}$ : 101 MHz), a Bruker Avance 500 ( $^1\text{H}$ : 500 MHz,  $^{13}\text{C}$ : 126 MHz), or a Bruker Avance Neo Cryo-Probe DCH ( $^1\text{H}$ : 600 MHz,  $^{13}\text{C}$ : 150 MHz). Deuterated solvents were purchased from Sigma-Aldrich and used as received. Chemical shifts are given in ppm at room temperature and are referenced to residual protic impurities in the solvents ( $^1\text{H}$ :  $\text{CHCl}_3$ : 7.24 ppm,  $\text{CH}_2\text{Cl}_2$ : 5.34 ppm,  $\text{C}_2\text{H}_2\text{Cl}_4$ : 5.91 ppm) or the deuterated solvent itself ( $^{13}\text{C}\{^1\text{H}\}$ :  $\text{CDCl}_3$ : 77.16 ppm,  $\text{CD}_2\text{Cl}_2$ : 53.4 ppm,  $\text{C}_2\text{D}_2\text{Cl}_4$ : 74.2 ppm). The resonance multiplicities are indicated as “s” (singlet), “brs” (broad singlet), “d” (doublet), “t” (triplet), “q” (quartet) and “m” (multiplet). Mass spectrometry was carried out with a Shimadzu AXIMA Confidence (MALDI-TOF, matrix: 2,5-dihydroxybenzoic acid DHB, trans-2-[3-(4-tert-butylphenyl)-2-methyl-2-propenylidene]-malononitrile, (DCTB) or without matrix (OM). High resolution mass spectrometry (HRMS) was recorded on a LDI/MALDI-ToF Bruker Ultraflex Extreme machine or on a APPI-ToF mass spectrometer Bruker maXis 4G UHR MS/MS spectrometer. UV/vis spectroscopy was carried out on a Varian Cary 5000 UV–vis–NIR spectrometer. The spectra were recorded at rt in DCM in quartz cuvettes (edge length = 1 cm) under ambient conditions. Fluorescence spectra were obtained from a Shimadzu RF-5301 PC and a NanoLog spectrofluorometer (Horiba Scientific). HPLC separation was carried out using Shimadzu analytical and preparative HPLC with system controller CBM-20A, solvent delivery unit LC-20A, auto-sampler SIL-20A, column oven CTO-20A, photodiode array detector SPD-M20A, on-line degassing unit DGU-20A and low pressure gradient unit. All chromatograms were processed with Shimadzu LabSolution(c) software and exported as ASCII files.

### PDI-tolane (2)

Under argon atmosphere bis(triphenylphosphine)palladium chloride (18.0 mg, 0.0256 mmol) and copper(I) iodide (4.88 mg, 0.0256 mmol) were added to a solution of **1** (100 mg, 0.129 mmol) in THF (3.2 mL). The mixture was degassed before and after the addition of a solution of 4-*tert*-butylphenyl-acetylene<sup>[1]</sup> (30.9 mg, 0.194 mmol) in triethylamine (2.8 mL) by introducing argon for 10 min. After heating up to 50 °C, the mixture was stirred for 27 h in a sealed high-pressure vessel. The solvent was evaporated under reduced pressure and the resulting crude product was purified by filtration over silica gel (DCM:hexane). Subsequent column chromatography ( $\text{SiO}_2$ , DCM:hexane) afforded **2** as a pink solid (66.1 mg, 0.773 mmol, 60%).

$^1\text{H}$ -NMR ( $\text{CDCl}_3$ , 400 MHz, rt):  $\delta$  [ppm] = 10.21 (d,  $J$  = 8.4 Hz, 1H), 8.75 (s, 1H), 8.68–8.46 (m, 5H), 7.64 (d,  $J$  = 8.4 Hz, 2H), 7.53 (d,  $J$  = 8.4 Hz, 2H), 5.25–5.13 (m, 2H), 2.34–2.19 (m, 4H), 1.96–1.83 (m, 4H), 1.41 (s, 9H), 1.39–1.19 (m, 24H), 0.84 (t,  $J$  = 6.8 Hz, 12H).

$^{13}\text{C}$ -NMR ( $\text{CDCl}_3$ , 101 MHz, rt):  $\delta$  [ppm] = 164.7, 163.7, 153.5, 138.5, 138.1, 134.4, 134.2, 133.8, 131.8, 131.3, 130.6, 129.2, 128.4, 127.2, 126.8, 126.7, 126.1, 124.1, 123.4, 122.8, 120.5, 119.3, 100.6, 90.8, 54.9, 54.8, 35.2, 32.5, 32.4, 31.9, 31.8, 31.3, 26.8, 26.7, 22.7, 14.2.

HRMS (MALDI-TOF, dctb):  $m/z$  for  $\text{C}_{58}\text{H}_{66}\text{N}_2\text{O}_4$  calc 854.5023, found 854.5017.

UV-Vis:  $\lambda$  [nm] = 279 ( $\epsilon$  = 53580 Lmol<sup>-1</sup>cm<sup>-1</sup>), 332 ( $\epsilon$  = 26560 Lmol<sup>-1</sup>cm<sup>-1</sup>), 349 ( $\epsilon$  = 26364 Lmol<sup>-1</sup>cm<sup>-1</sup>), 362 ( $\epsilon$  = 24538 L mol<sup>-1</sup>cm<sup>-1</sup>), 394 ( $\epsilon$  = 11329 L mol<sup>-1</sup>cm<sup>-1</sup>), 464 ( $\epsilon$  = 22614 L mol<sup>-1</sup>cm<sup>-1</sup>), 510 ( $\epsilon$  = 47532 L mol<sup>-1</sup>cm<sup>-1</sup>), 549 ( $\epsilon$  = 72962 L mol<sup>-1</sup>cm<sup>-1</sup>).  
Fluorescence:  $\lambda$  [nm, ( $\lambda_{ex}$  = 549 nm)] = 579.

### PDI-PPB (3)

A 1 mL MW-vial was charged with PDI-toluene **2** (50.0 mg, 0.058 mmol, 1 equiv.), tetracyclone<sup>[2,3]</sup> (36.0 mg, 0.058 mmol, 1 equiv.) and toluene (0.5 mL) and sealed with a septum. The reaction mixture was degassed with N<sub>2</sub> for 5 minutes and heated to 220°C for 24 h. The solvent was removed under reduced pressure and the crude was purified by column chromatography (SiO<sub>2</sub>, DCM:Hexane 1:1) to provide the pure product **3** as a pink solid (63.0 mg, 0.044 mmol, 76%).

<sup>1</sup>H NMR (C<sub>2</sub>D<sub>2</sub>Cl<sub>4</sub>, 400 MHz, 110°C)  $\delta$  [ppm] = 8.64 (d,  $J$  = 8.3 Hz, 1H), 8.56 – 8.46 (m, 2H), 8.44 (d,  $J$  = 8.0 Hz, 1H), 8.35 – 8.27 (m, 3H), 6.87 – 6.82 (m, 2H), 6.81 – 6.74 (m, 6H), 6.74 – 6.69 (m, 4H), 6.56 – 6.37 (m, 8H), 5.21 – 5.08 (m, 1H), 5.08 – 4.98 (m, 1H), 2.30 – 2.07 (m, 4H), 1.94 – 1.75 (m, 4H), 1.36 – 1.21 (m, 24H), 1.11 (s, 9H), 1.06 (s, 18H), 0.80 (s, 30H).

<sup>13</sup>C NMR (C<sub>2</sub>D<sub>2</sub>Cl<sub>4</sub>, 101 MHz, 90°C)  $\delta$  [ppm] = 164.3, 163.7, 148.5, 148.09, 148.06, 143.03, 142.97, 141.6, 140.2, 138.8, 138.6, 137.3, 137.2, 136.9, 136.4, 134.4, 134.1, 133.4, 131.2, 131.1, 130.6, 130.3, 129.9, 129.0, 127.7, 127.5, 127.1, 127.0, 123.14, 123.11, 123.0, 122.4, 122.0, 121.0, 120.4, 99.7, 54.7, 54.6, 34.01, 33.95, 33.8, 32.5, 32.4, 31.63, 31.61, 31.2, 31.1, 30.9, 26.6, 26.47, 22.46, 22.4, 13.9, 13.83.

HRMS (MALDI-TOF, dctb):  $m/z$  for C<sub>102</sub>H<sub>118</sub>N<sub>2</sub>O<sub>4</sub> calc 1434.9086, found 1434.9172.

UV-Vis:  $\lambda$  [nm] = 471 ( $\epsilon$  = 12840 Lmol<sup>-1</sup>cm<sup>-1</sup>), 506 ( $\epsilon$  = 24260 Lmol<sup>-1</sup>cm<sup>-1</sup>), 541 ( $\epsilon$  = 35930 Lmol<sup>-1</sup>cm<sup>-1</sup>).

Fluorescence:  $\lambda$  [nm, ( $\lambda_{ex}$  = 541 nm)] = 588.

### PTE-(Br)<sub>2</sub> (4)

Perylenetetradecyl ester<sup>[4]</sup> (300 mg, 0.300 mmol) and K<sub>2</sub>CO<sub>3</sub> (101 mg, 0.730 mmol) were dissolved in CH<sub>2</sub>Cl<sub>2</sub> (3 mL) before bromine (625 mg, 3.91 mmol) was added. The mixture was stirred at rt for 24 h and excess bromine was removed by washing with aqueous Na<sub>2</sub>S<sub>2</sub>O<sub>3</sub>- solution. The crude product was purified by filtration over a silica plug (THF/hexane 1:7) to yield **4** as a mixture of 1.6-and 1.7-isomers in 76% (262 mg, 0.228 mmol).

<sup>1</sup>H NMR [400 MHz, CD<sub>2</sub>Cl<sub>2</sub>, rt]  $\delta$  [ppm] = 9.00, 8.84 (2d,  $J$  = 7.9 Hz, 2H), 8.34, 8.28 (2s, 2H), 8.10, 8.04 (2d,  $J$  = 7.9 Hz, 2H), 4.34 (t,  $J$  = 6.6 Hz, 8H), 1.87 – 1.79 (m, 8H), 1.51 – 1.29 (m, 56H), 0.90 (t,  $J$  = 6.7 Hz, 12H).

<sup>13</sup>C DEPT $q$  NMR [101 MHz, CD<sub>2</sub>Cl<sub>2</sub>, rt]  $\delta$  [ppm] = 168.0 (C=O), 167.7 (C=O), 166.9 (C=O), 166.6 (C=O), 136.7 (C $_q$ ), 136.5 (C $_q$ ), 132.7 (CH), 131.9 (CH), 131.7 (CH), 131.6 (CH), 130.9 (CH), 130.8 (CH), 130.7 (CH), 130.5 (CH), 130.4 (CH), 130.1 (CH), 128.9 (C $_q$ ), 128.78 (C $_q$ ), 127.6 (C $_q$ ), 127.1 (C $_q$ ), 126.3 (CH), 119.64 (CH), 118.63 (CH), 66.13 (CH<sub>2</sub>), 66.06 (CH<sub>2</sub>), 65.9 (CH<sub>2</sub>), 65.78 (CH<sub>2</sub>), 31.9 (CH<sub>2</sub>), 29.58 (CH<sub>2</sub>), 29.56 (CH<sub>2</sub>), 29.4 (CH<sub>2</sub>), 29.3 (CH<sub>2</sub>), 28.6 (CH<sub>2</sub>), 28.5 (CH<sub>2</sub>), 26.03 (CH<sub>2</sub>), 25.98 (CH<sub>2</sub>), 22.7 (CH<sub>2</sub>), 13.9 (CH<sub>3</sub>).

HRMS (APPI):  $m/z$  for C<sub>64</sub>H<sub>90</sub>Br<sub>2</sub>O<sub>8</sub> calcd 1144.4997, found 1144.4974.

UV-Vis:  $\lambda$  [nm] = 277 ( $\epsilon$  = 33989 M<sup>-1</sup>cm<sup>-1</sup>), 443 ( $\epsilon$  = 24220 M<sup>-1</sup>cm<sup>-1</sup>), 468 ( $\epsilon$  = 27358 M<sup>-1</sup>cm<sup>-1</sup>).

Fluorescence:  $\lambda$  [nm ( $\lambda_{ex}$  = 468 nm)] = 500.

### PTE-tolane (5)

In a pressure vial bis(triphenylphosphine)palladium chloride (18.3 mg, 0.0262 mmol) and copper(I) iodide (4.98 mg, 0.0262 mmol) were added to a solution of **4** (150 mg, 0.131 mmol) in THF (4.5 mL). After degassing, a solution of 4-*tert*-butylphenylacetylene<sup>[1]</sup> (30.9 mg, 0.194 mmol) in triethylamine (4.0 mL) was added to the mixture. The mixture was stirred at 50°C for 17 h, the solvent was evaporated under reduced pressure and the resulting crude product was purified by filtration over silica gel (DCM:hexane). The regioisomers **5a** and **5b** were then separated *via* preparative HPLC to yield 16% (27 mg, 0.0208 mmol) of **5a** and 72% (123 mg, 0.0946 mmol) of **5b**.

#### 1.6-PTE-tolane 5a:

<sup>1</sup>H-NMR (CD<sub>2</sub>Cl<sub>2</sub>, 400 MHz, rt):  $\delta$  [ppm] = 9.61 (d,  $J$  = 8.0 Hz, 2H), 8.32 (s, 2H), 8.18 (d,  $J$  = 8.0 Hz, 2H), 7.60 (d,  $J$  = 8.6 Hz, 4H), 7.50 (d,  $J$  = 8.6 Hz, 4H), 4.34 (t,  $J$  = 6.9 Hz, 8H), 1.87 – 1.78 (m, 8H), 1.51 – 1.44 (m, 8H), 1.44 – 1.24 (m, 66H), 0.95 – 0.84 (m, 12H).

<sup>13</sup>C-NMR (CD<sub>2</sub>Cl<sub>2</sub>, 101 MHz, rt):  $\delta$  [ppm] = 168.2, 167.5, 152.8, 136.1, 133.6, 131.9, 131.5, 130.9, 130.7, 130.2, 129.4, 129.2, 127.6, 126.5, 126.3, 125.7, 119.6, 119.1, 95.5, 90.3, 65.9, 65.7, 34.8, 31.9, 30.9, 29.6, 29.4, 29.33, 29.30, 28.58, 28.55, 26.0, 22.7, 13.9.

HRMS (MALDI-TOF, dctb):  $m/z$  for C<sub>88</sub>H<sub>116</sub>O<sub>8</sub> calc 1300.8665, found 1300.8678.

UV-Vis:  $\lambda$  [nm] = 252 ( $\epsilon$  = 65467 Lmol<sup>-1</sup>cm<sup>-1</sup>), 288 ( $\epsilon$  = 43987 Lmol<sup>-1</sup>cm<sup>-1</sup>), 380 ( $\epsilon$  = 55637 Lmol<sup>-1</sup>cm<sup>-1</sup>), 474 ( $\epsilon$  = 23104 Lmol<sup>-1</sup>cm<sup>-1</sup>), 508 ( $\epsilon$  = 25306 Lmol<sup>-1</sup>cm<sup>-1</sup>).

Fluorescence:  $\lambda$  [nm, ( $\lambda_{ex}$  = 380 nm)] = 540

#### 1.7-PTE-tolane 5b:

<sup>1</sup>H-NMR (CD<sub>2</sub>Cl<sub>2</sub>, 500 MHz, rt):  $\delta$  [ppm] = 9.61 (d,  $J$  = 8.1 Hz, 2H), 8.31 (s, 2H), 8.17 (d,  $J$  = 8.0 Hz, 2H), 7.60 (d,  $J$  = 8.7 Hz, 2H), 7.50 (d,  $J$  = 8.6 Hz, 2H), 4.34 (q,  $J$  = 7.0 Hz, 8H), 1.82 (m,  $J$  = 7.5, 2.8 Hz, 8H), 1.52 – 1.45 (m, 8H), 1.43 – 1.26 (m, 66H), 0.91 – 0.85 (m, 12H).

<sup>13</sup>C-NMR (CD<sub>2</sub>Cl<sub>2</sub>, 126 MHz, rt):  $\delta$  [ppm] = 168.1, 167.7, 152.8, 135.8, 133.2, 132.4, 131.5, 130.6, 130.4, 129.7, 129.6, 127.0, 126.8, 125.7, 119.6, 118.3, 95.8, 90.2, 65.8, 65.7, 34.8, 31.9, 30.9, 29.57, 29.56, 29.4, 29.34, 29.32, 28.58, 28.56, 26.0, 22.68, 22.67, 13.86.

HRMS (MALDI-TOF, dctb):  $m/z$  for C<sub>88</sub>H<sub>116</sub>O<sub>8</sub> calc 1300.8665, found 1300.8670.

UV-Vis:  $\lambda$  [nm] = 247 ( $\epsilon$  = 62166 Lmol<sup>-1</sup>cm<sup>-1</sup>), 316 ( $\epsilon$  = 53188 Lmol<sup>-1</sup>cm<sup>-1</sup>), 487 ( $\epsilon$  = 23644 Lmol<sup>-1</sup>cm<sup>-1</sup>), 517 ( $\epsilon$  = 28952 Lmol<sup>-1</sup>cm<sup>-1</sup>).

Fluorescence:  $\lambda$  [nm, ( $\lambda_{ex}$  = 316 nm)] = 549.

### PTE-(PPB)<sub>2</sub> (6)

A 1 mL MW-vial was charged with PTE-tolane (**5**), tetracyclone<sup>[2,3]</sup> and toluene (1 mL) and sealed with a septum. The reaction mixture was degassed with N<sub>2</sub> for 5 minutes and heated to 220°C for 24 h. The solvent was removed under reduced pressure and the crude was purified by plug chromatography (SiO<sub>2</sub>, DCM:Hexane 2:3) to provide the pure products **6a** and **6b** as a pink solid.

**1,6-PTE-(PPB)<sub>2</sub> 6a:** **5a** (50.0 mg, 0.038 mmol, 1 equiv.), tetracyclone (58.0 mg, 0.096 mmol, 2.5 equiv.); yield 62% (58.0 mg, 0.024 mmol).

<sup>1</sup>H-NMR (C<sub>2</sub>D<sub>2</sub>Cl<sub>4</sub>, 500 MHz, 130°C):  $\delta$  [ppm] = 7.83 (d,  $J$  = 7.9 Hz, 2H), 7.71 (d,  $J$  = 7.9 Hz, 2H), 7.57 (s, 2H), 6.78 (d,  $J$  = 8.6 Hz, 4H), 6.71 (d,  $J$  = 8.4 Hz, 8H), 6.67 (d,  $J$  = 7.8 Hz, 4H), 6.55 (d,  $J$  = 8.1 Hz, 8H), 6.49 – 6.01 (m, 16H), 4.28 (t,  $J$  = 6.9 Hz, 4H), 3.98 (t,

$J = 7.1$  Hz, 4H), 1.78 – 1.68 (m, 4H), 1.65 – 1.57 (m, 4H), 1.41 – 1.24 (m, 56H), 1.09 (s, 18H), 1.05 (s, 36H), 0.97 (s, 36H), 0.92 – 0.84 (m, 12H).

$^{13}\text{C-NMR}$  ( $\text{C}_2\text{D}_2\text{Cl}_4$ , 126 MHz,  $130^\circ\text{C}$ ):  $\delta$  [ppm] = 168.6, 167.9, 148.1, 148.0, 147.9, 142.7, 142.3, 140.1, 139.7, 138.0, 137.6, 137.2, 136.3, 134.3, 132.4, 131.5, 131.45, 131.35, 130.8, 130.0, 128.9, 128.7, 128.5, 127.6, 125.6, 124.8, 123.1, 123.0, 122.9, 120.6, 100.0, 65.1, 65.0, 34.14, 34.09, 34.00, 32.0, 31.5, 31.4, 31.3, 29.74, 29.71, 29.6, 29.5, 29.42, 29.39, 29.38, 28.9, 28.8, 26.3, 26.2, 22.74, 22.72, 14.1.

HRMS (MALDI-TOF, dctb):  $m/z$  for  $\text{C}_{176}\text{H}_{220}\text{O}_8$  calc 2461.6803, found 2461.6882.

UV-Vis:  $\lambda$  [nm] = 340 ( $\epsilon = 14100 \text{ L mol}^{-1}\text{cm}^{-1}$ ), 428 ( $\epsilon = 9675 \text{ L mol}^{-1}\text{cm}^{-1}$ ), 467 ( $\epsilon = 15250 \text{ L mol}^{-1}\text{cm}^{-1}$ ), 493 ( $\epsilon = 17420 \text{ L mol}^{-1}\text{cm}^{-1}$ ).

Fluorescence:  $\lambda$  [nm, ( $\lambda_{\text{ex}} = 493 \text{ nm}$ )] = 533.

**1,7-PTE-(PPB)<sub>2</sub> 6b: 5b** (170 mg, 0.131 mmol, 1 equiv.), tetracyclone (200 mg, 0.328 mmol, 2.5 equiv.); yield 72% (232 mg, 0.094 mmol).

$^1\text{H-NMR}$  ( $\text{CD}_2\text{Cl}_2$ , 400 MHz, rt):  $\delta$  [ppm] = 8.35 (d,  $J = 8.2$  Hz, 2H), 7.78 (s, 2H), 7.72 (d,  $J = 8.2$  Hz, 2H), 6.95 – 6.26 (m, 40H), 4.24 (t,  $J = 7.0$  Hz, 4H), 4.15 (t,  $J = 6.9$  Hz, 4H), 1.78 (q,  $J = 7.2$  Hz, 4H), 1.73 – 1.63 (m, 4H), 1.51 – 1.22 (m, 56H), 1.12 (s, 18H), 1.08 (s, 36H), 0.93 – 0.87 (m, 12H), 0.86 (s, 36H).

$^{13}\text{C-NMR}$  ( $\text{CD}_2\text{Cl}_2$ , 101 MHz, rt):  $\delta$  [ppm] = 169.1, 168.2, 148.6, 148.5, 148.4, 143.3, 142.2, 141.5, 139.3, 138.5, 138.3, 137.4, 137.2, 137.0, 134.5, 133.2, 131.7, 131.6, 131.3, 131.1, 130.7, 129.9, 129.7, 128.9, 127.8, 127.1, 126.5, 123.8, 123.7, 65.8, 65.6, 34.6, 34.5, 34.4, 32.5, 31.50, 31.47, 31.4, 30.3, 30.23, 30.22, 30.04, 29.97, 29.96, 29.3, 26.67, 26.64, 23.3, 14.5.

HRMS (MALDI-TOF, dctb):  $m/z$  for  $\text{C}_{176}\text{H}_{220}\text{O}_8$  calc 2461.6803, found 2461.6809.

UV-Vis:  $\lambda$  [nm] = 387 ( $\epsilon = 8000 \text{ L mol}^{-1}\text{cm}^{-1}$ ), 475 ( $\epsilon = 18730 \text{ L mol}^{-1}\text{cm}^{-1}$ ), 497 ( $\epsilon = 20830 \text{ L mol}^{-1}\text{cm}^{-1}$ ).

Fluorescence:  $\lambda$  [nm, ( $\lambda_{\text{ex}} = 497 \text{ nm}$ )] = 550.

### **PDA-(PPB)<sub>2</sub> (8)**

PTE-(PPB)<sub>2</sub> (**6**) was dissolved in toluene:dodecane 1:5 and heated to  $95^\circ\text{C}$ . *p*-Toluenesulfonic-acid was added and the reaction mixture was stirred at  $95^\circ\text{C}$  for 24 h. The reaction mixture was cooled to rt, dissolved in DCM and washed with  $\text{H}_2\text{O}$ . The crude product was distilled in vacuo to remove remaining decanol and was subjected to plug chromatography ( $\text{SiO}_2$ , DCM:Hexane 1:1) to provide the title compounds **8a** and **8b** as red solids.

**1,6-PDA-(PPB)<sub>2</sub> 8a: 6a** (40.0 mg, 0.016 mmol, 1 equiv.), *p*-toluenesulfonic-acid (10.0 mg, 0.049 mmol, 3 equiv.), toluene:dodecane 1:5 (2 mL); yield 91% (27.0 mg, 0.015 mmol).

$^1\text{H-NMR}$  ( $\text{CDCl}_3$ , 500 MHz, rt):  $\delta$  [ppm] = 8.37 (d,  $J = 8.0$  Hz, 2H), 8.26 (d,  $J = 8.1$  Hz, 2H), 8.14 (s, 2H), 6.94 – 5.96 (m, 40H), 1.09 (s, 18H), 1.05 (s, 36H), 0.93 (s, 36H).

$^{13}\text{C-NMR}$  ( $\text{CDCl}_3$ , 126 MHz, rt):  $\delta$  [ppm] = 160.4, 159.7, 148.2, 148.1, 143.3, 143.2, 141.8, 139.1, 138.9, 137.1, 137.0, 136.9, 136.7, 133.9, 131.7, 131.4, 131.1, 131.0, 130.9, 130.8, 130.6, 129.9, 129.5, 129.3, 129.2, 128.6, 128.0, 127.5, 126.9, 126.7, 123.5, 123.4, 122.9, 117.1, 117.2, 34.3, 34.22, 34.18, 31.31, 31.27, 31.2.

HRMS (MALDI-TOF, dctb):  $m/z$  for  $\text{C}_{136}\text{H}_{136}\text{O}_6$  calc 1865.0331, found 1865.0313.

UV-Vis:  $\lambda$  [nm] = 525 ( $\epsilon = 17630 \text{ L mol}^{-1}\text{cm}^{-1}$ ), 564 ( $\epsilon = 19940 \text{ L mol}^{-1}\text{cm}^{-1}$ ).

Fluorescence:  $\lambda$  [nm, ( $\lambda_{\text{ex}} = 564 \text{ nm}$ )] = 612.

**1,7-PDA-(PPB)<sub>2</sub> 8b: 6b** (210 mg, 0.085 mmol, 1 equiv.), *p*-toluenesulfonic-acid (48.0 mg, 0.255 mmol, 3 equiv.), toluene:dodecane 1:5 (4 mL); yield 89% (141 mg, 0.076 mmol).

<sup>1</sup>H-NMR (CDCl<sub>3</sub>, 400 MHz, rt): δ [ppm] = 8.55 (d, *J* = 8.4 Hz, 2H), 8.38 – 8.26 (m, 4H), 6.70 (d, *J* = 43.9 Hz, 40H), 1.08 (s, 18H), 1.03 (s, 36H), 0.89 (s, 36H).

<sup>13</sup>C-NMR (CDCl<sub>3</sub>, 126 MHz, rt): δ [ppm] = 160.5, 159.9, 148.8, 148.2, 148.1, 143.7, 143.1, 141.5, 140.2, 139.0, 138.3, 137.2, 137.1, 136.9, 136.4, 134.9, 131.0, 130.9, 130.6, 129.5, 128.8, 128.2, 127.9, 123.9, 123.5, 123.4, 123.1, 118.2, 116.8, 34.25, 34.19, 34.18, 31.29, 31.25, 31.20.

HRMS (MALDI-TOF, dctb): *m/z* for C<sub>136</sub>H<sub>136</sub>O<sub>6</sub> calc 1865.0331, found 1865.0363.

UV-Vis: λ [nm] = 436 (ε = 12800 Lmol<sup>-1</sup>cm<sup>-1</sup>), 505 (ε = 16680 Lmol<sup>-1</sup>cm<sup>-1</sup>), 540 (ε = 23300 Lmol<sup>-1</sup>cm<sup>-1</sup>).

Fluorescence: λ [nm, (λ<sub>ex</sub> = 540 nm)] = 639.

### PDI-(PPB)<sub>2</sub> (6)

PDA-(PPB)<sub>2</sub> (8), 6-undecylamine and imidazole were stirred at 140 °C for 1 h. The reaction mixture was cooled to rt, dissolved in DCM and washed with H<sub>2</sub>O. The crude product was subjected to plug chromatography (SiO<sub>2</sub>, DCM:hexanes 1:1) to provide the title compounds **6a** and **6b** as pink solids.

**1,6-PDI-(PPB)<sub>2</sub> 6a: 8a** (10.0 mg, 0.005 mmol, 1 equiv.), 6-undecylamine (2.75 mg, 0.016 mmol, 3 equiv.), imidazole (1g); yield 74% (8.00 mg, 3.68 μmol).

<sup>1</sup>H-NMR (C<sub>2</sub>D<sub>2</sub>Cl<sub>4</sub>, 400 MHz, 100°C): δ [ppm] = 8.29 (d, *J* = 8.1 Hz, 2H), 8.21 (d, *J* = 8.1 Hz, 2H), 8.06 (s, 2H), 6.92 – 6.55 (m, 28H), 6.50 – 6.11 (m, 12H), 5.21 – 5.09 (m, 1H), 4.91 – 4.79 (m, 1H), 2.34 – 2.20 (m, 2H), 1.99 – 1.89 (m, 2H), 1.87 – 1.75 (m, 2H), 1.77 – 1.68 (m, 2H), 1.31 – 1.20 (m, 24H), 1.09 (s, 18H), 1.03 (s, 36H), 0.88 (s, 36H), 0.85 – 0.74 (m, 12H).

<sup>13</sup>C-NMR (C<sub>2</sub>D<sub>2</sub>Cl<sub>4</sub>, 101 MHz, 100°C): δ [ppm] = 148.2, 148.0, 147.9, 142.72, 142.70, 140.1, 138.9, 137.5, 137.4, 137.3, 136.9, 135.6, 132.9, 131.3, 131.2, 131.1, 129.6, 129.5, 128.5, 128.3, 127.8, 126.9, 126.4, 124.8, 123.0, 122.9, 122.8, 122.6, 54.3, 54.2, 33.98, 33.91, 33.7, 32.4, 32.3, 31.20, 31.19, 31.1, 31.0, 29.6, 27.9, 26.4, 26.3, 22.4, 22.3, 13.9, 13.8, 13.7.

HRMS (MALDI-TOF, dctb): *m/z* for C<sub>158</sub>H<sub>182</sub>N<sub>2</sub>O<sub>4</sub> calc 2171.4094, found 2171.4075.

UV-Vis: λ [nm] = 284 (ε = 55900 Lmol<sup>-1</sup>cm<sup>-1</sup>), 484 (ε = 9800 L mol<sup>-1</sup>cm<sup>-1</sup>), 521 (ε = 15250 L mol<sup>-1</sup>cm<sup>-1</sup>), 559 (ε = 21200 L mol<sup>-1</sup>cm<sup>-1</sup>).

Fluorescence: λ [nm, (λ<sub>ex</sub> = 559 nm)] = 592.

**1,7-PDI-(PPB)<sub>2</sub> 6b: 8b** (20.0 mg, 0.01 mmol, 1 equiv.), 6-undecylamine (5.50 mg, 0.032 mmol, 3 equiv.), imidazole (2g); yield 74% (16.0 mg, 0.007 mmol).

<sup>1</sup>H-NMR (C<sub>2</sub>D<sub>2</sub>Cl<sub>4</sub>, 500 MHz, 120°C): δ [ppm] = 8.55 (d, *J* = 8.3 Hz, 2H), 8.34 – 8.26 (m, 4H), 6.85 – 6.79 (m, 4H), 6.78 – 6.72 (m, 12H), 6.67 – 6.64 (m, 8H), 6.59 – 6.41 (m, 16H), 5.12 – 5.02 (m, 2H), 2.22 – 2.11 (m, 4H), 1.93 – 1.77 (m, 4H), 1.35 – 1.21 (m, 24H), 1.10 (s, 18H), 1.04 (s, 36H), 0.87 – 0.82 (m, 48H).

<sup>13</sup>C-NMR (C<sub>2</sub>D<sub>2</sub>Cl<sub>4</sub>, 126 MHz, 110°C): δ [ppm] = 164.5, 157.6, 148.6, 148.0, 147.9, 143.2, 142.6, 140.5, 140.1, 138.4, 137.4, 137.3, 136.8, 136.1, 133.9, 131.2, 131.0, 130.0, 129.0, 127.8, 127.6, 127.5, 123.1, 123.0, 122.9, 120.4, 54.5, 34.0, 33.9, 33.8, 32.5, 31.9, 31.6, 31.2, 31.1, 31.0, 29.6, 26.5, 22.6, 22.4, 13.9, 13.8.

HRMS (MALDI-TOF, dctb): *m/z* for C<sub>158</sub>H<sub>182</sub>N<sub>2</sub>O<sub>4</sub> calc 2171.4094, found 2171.4125.

UV-Vis: λ [nm] = 423 (ε = 6020 Lmol<sup>-1</sup>cm<sup>-1</sup>), 509 (ε = 13870 Lmol<sup>-1</sup>cm<sup>-1</sup>), 543 (ε = 20720 Lmol<sup>-1</sup>cm<sup>-1</sup>).

Fluorescence: λ [nm, (λ<sub>ex</sub> = 543 nm)] = 597.

S3. NMR- and mass-spectra

**PDI-tolane (2)**

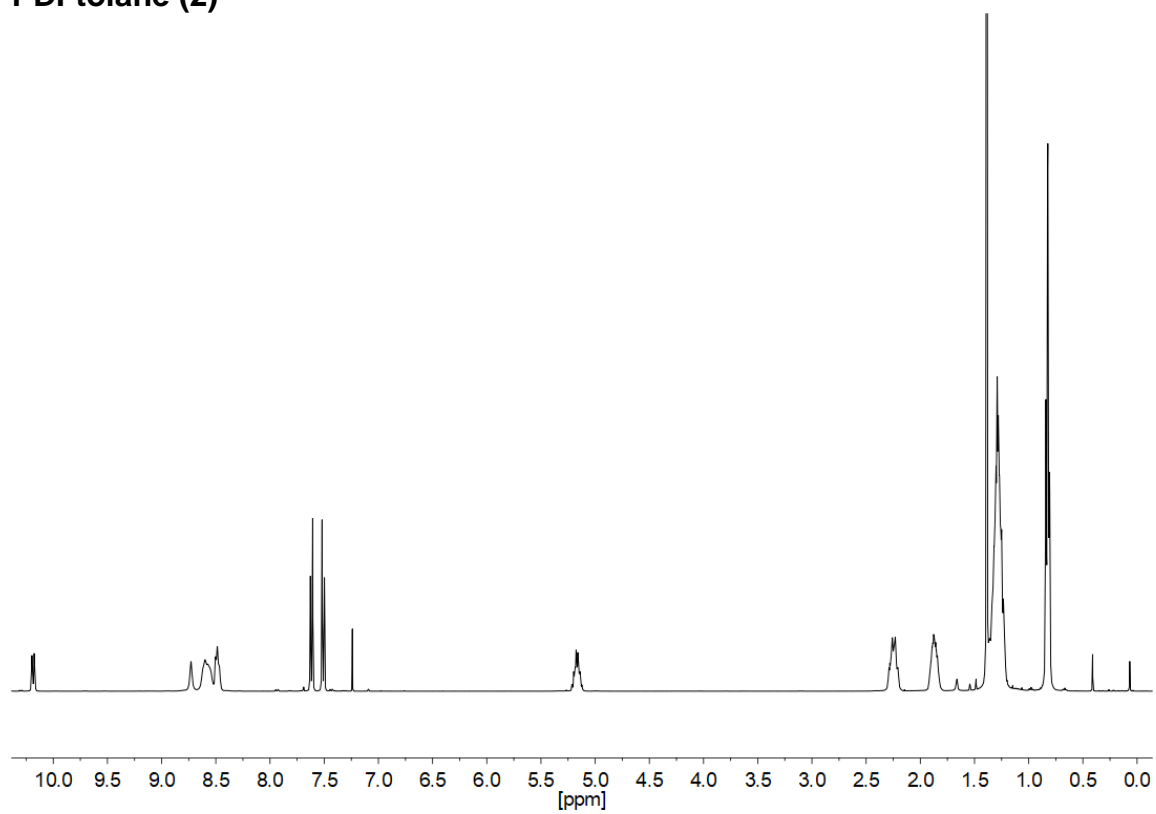

$^1\text{H}$  NMR (400 MHz,  $\text{CDCl}_3$ , rt)



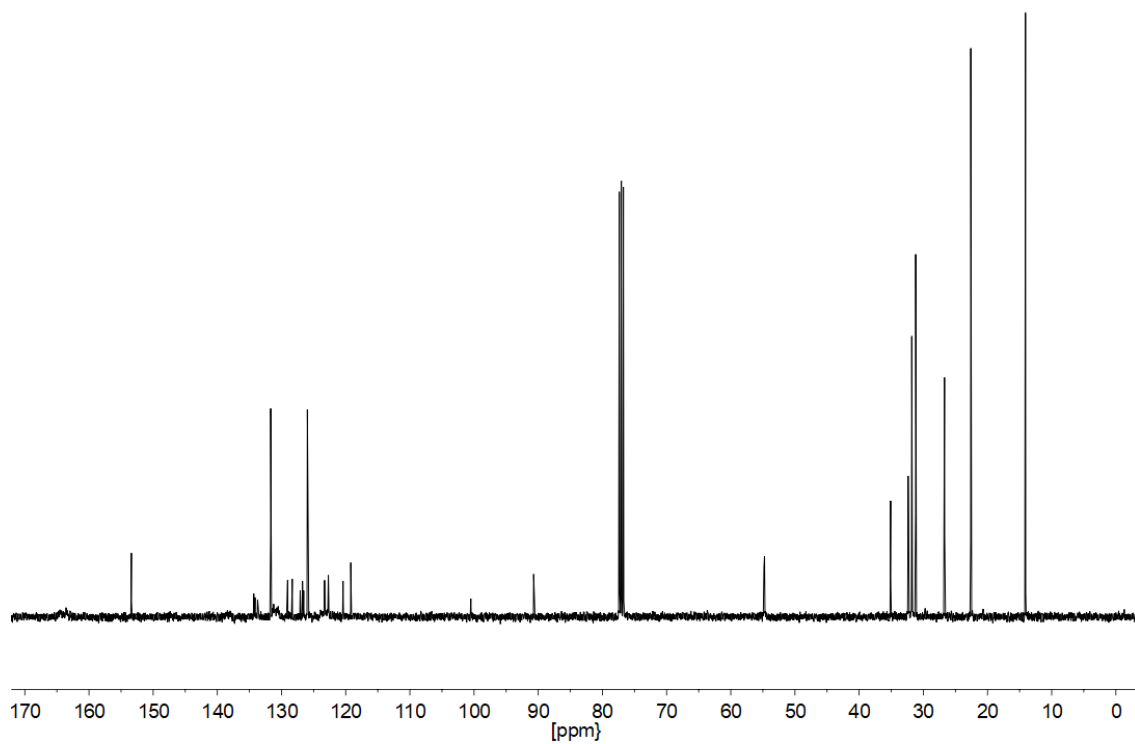

$^{13}\text{C}$  NMR (101 MHz,  $\text{CDCl}_3$ , rt)

### PDI-PPB (3)

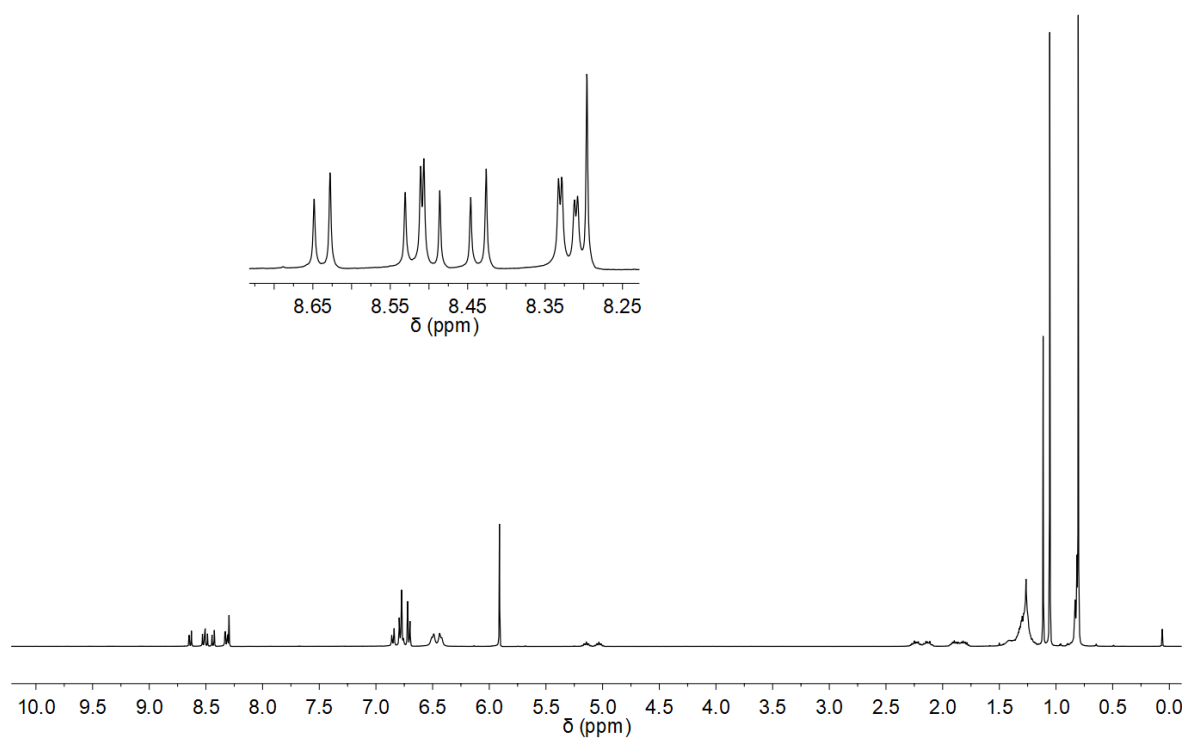

$^1\text{H}$  NMR (400 MHz,  $\text{C}_2\text{D}_2\text{Cl}_4$ ,  $110^\circ\text{C}$ )

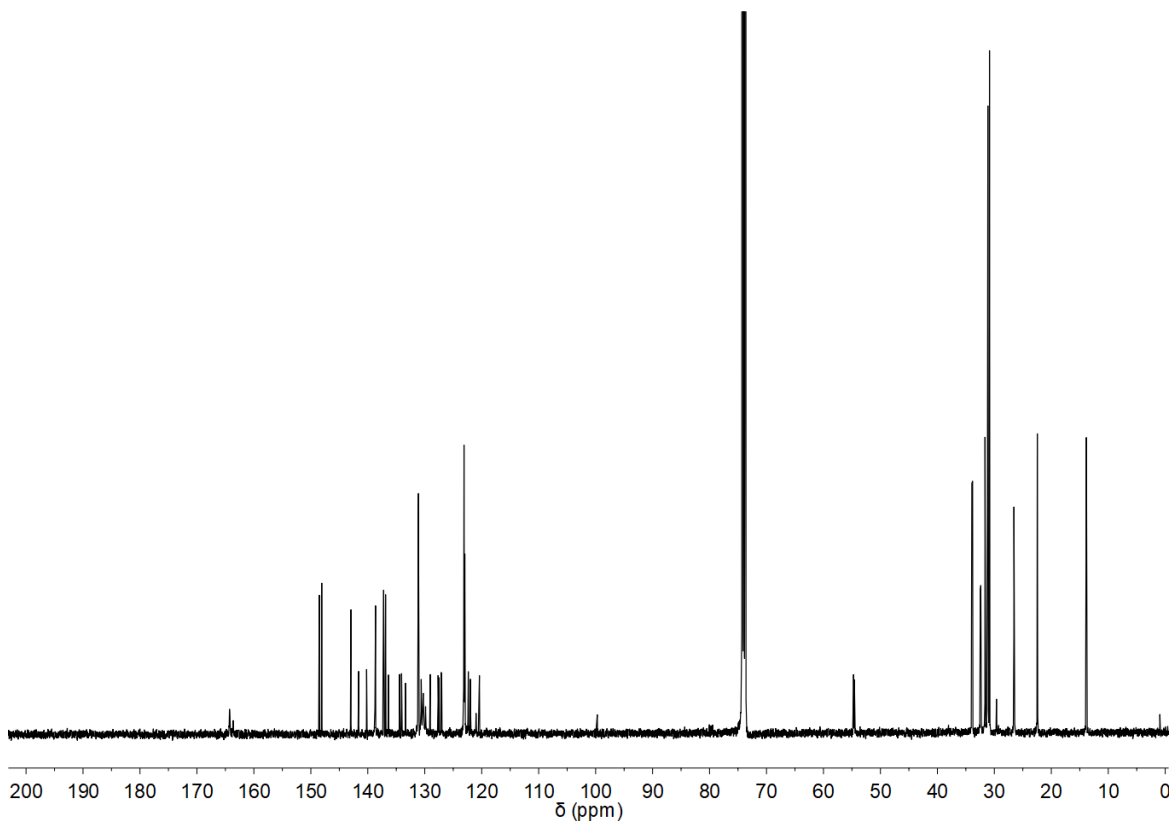

<sup>13</sup>C NMR (101 MHz, C<sub>2</sub>D<sub>2</sub>Cl<sub>4</sub>, 90°C)

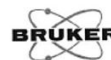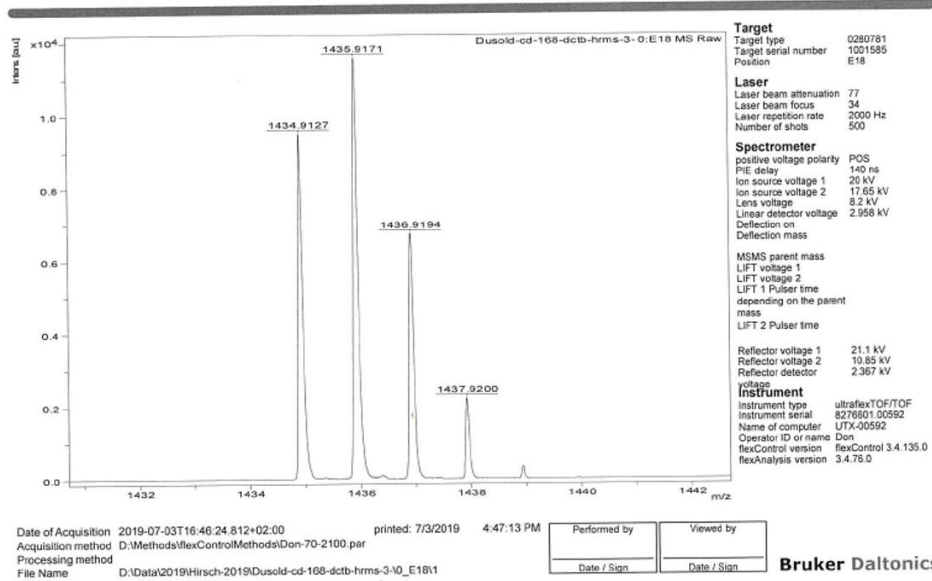

SmartFormula

| Formula                                                         | Mass       | Error  | mSigma  | DblEq | N rule | Electron Configuration |
|-----------------------------------------------------------------|------------|--------|---------|-------|--------|------------------------|
| C <sub>102</sub> H <sub>118</sub> N <sub>2</sub> O <sub>4</sub> | 1,434.9086 | 2.8228 | 39.3231 | 45.00 | ok     | odd                    |

HRMS (MALDI-TOF, dctb)

PTE-(Br)<sub>2</sub> (4)

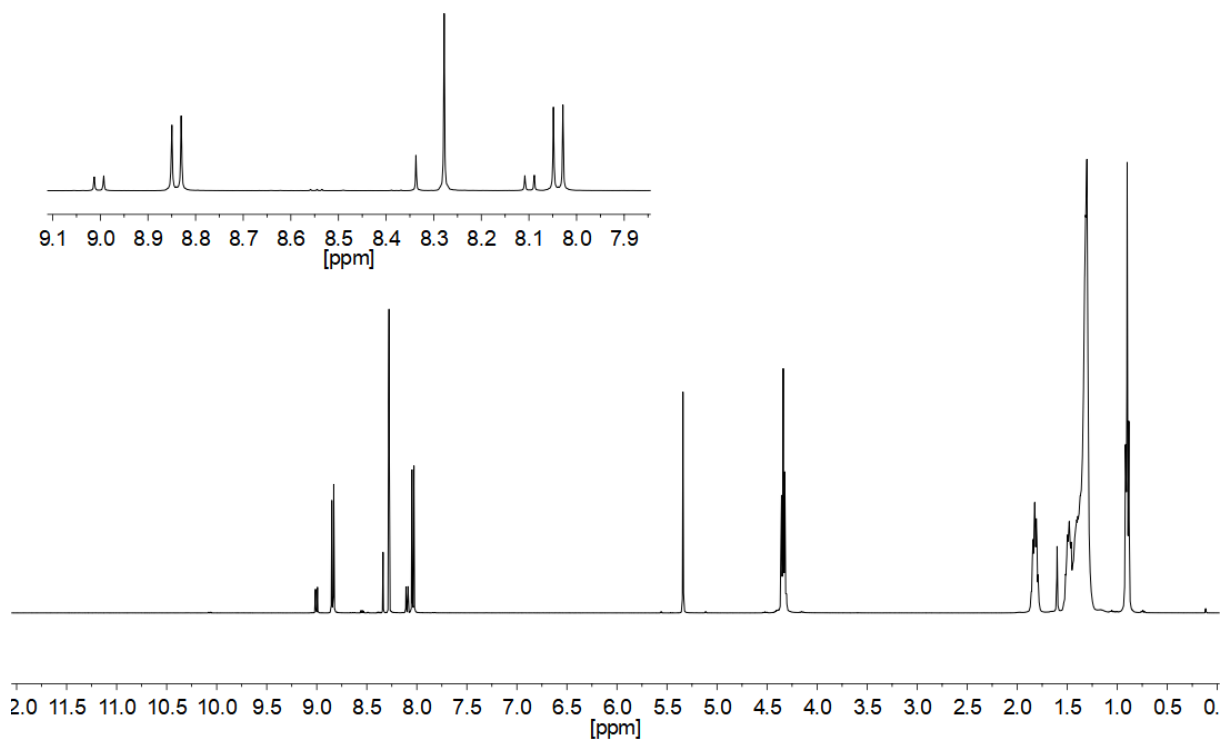

$^1\text{H}$  NMR (400 MHz,  $\text{CD}_2\text{Cl}_2$ , rt)

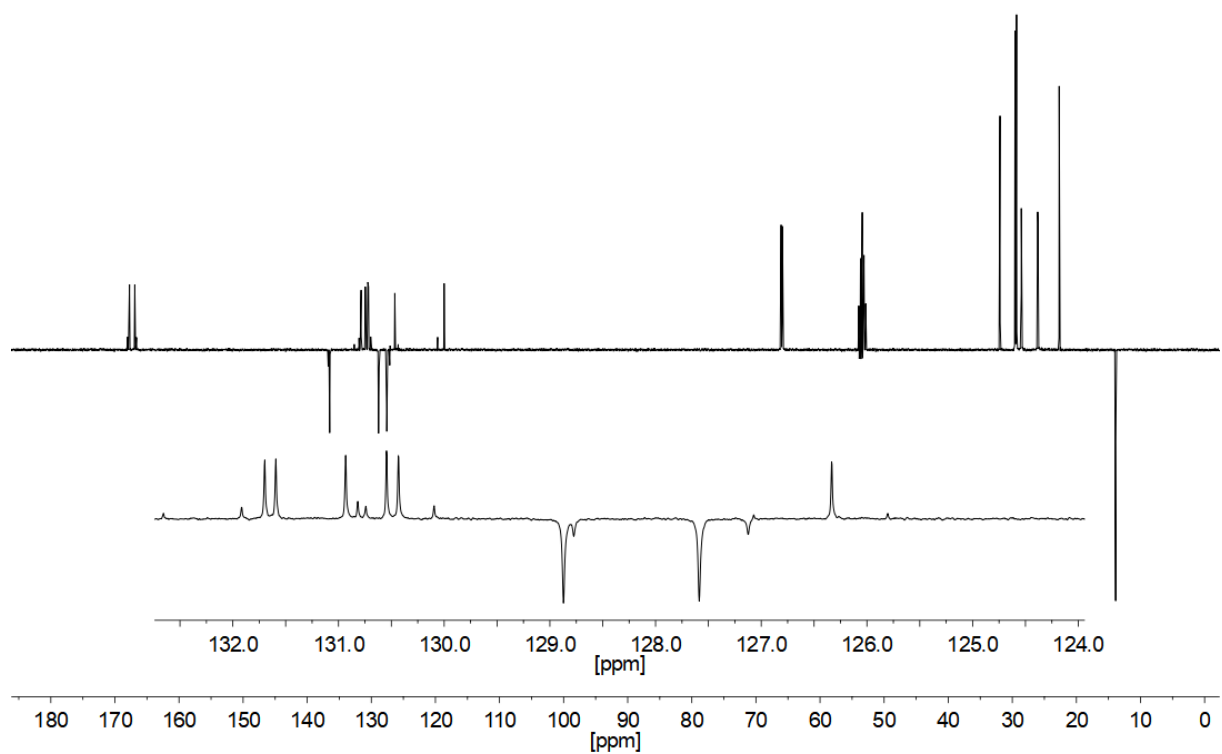

$^{13}\text{C}$  DEPT $q$  NMR (101 MHz,  $\text{CD}_2\text{Cl}_2$ , rt)

f Calibrant

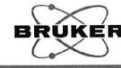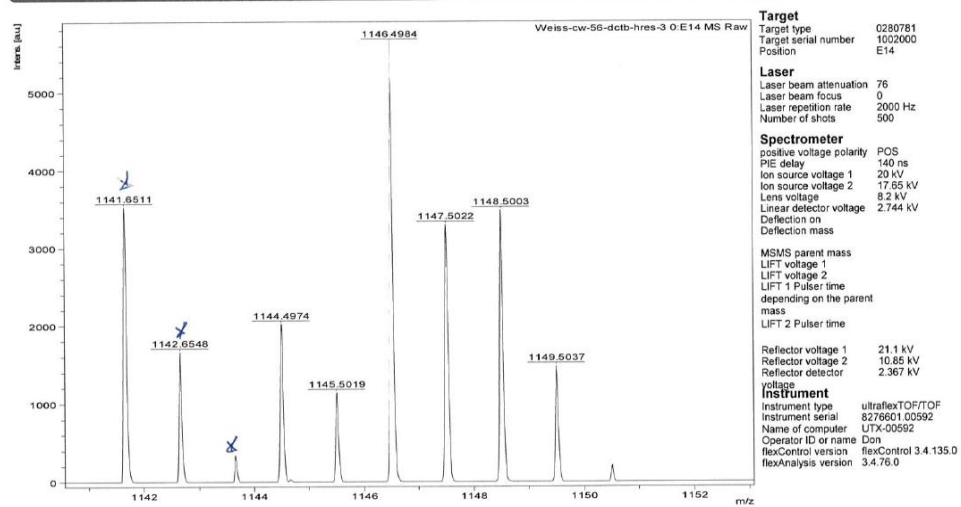

Date of Acquisition: 2020-08-28T14:18:12.468+02:00  
Acquisition method: D:\Methods\flexControlMethods\Don-70-2100.par  
Processing method  
File Name: D:\Data\2020\2020-Hirsch\Weiss-cw-56-dctb-hres-30\_E14V1

|              |             |
|--------------|-------------|
| Performed by | Viewed by   |
| Date / Sign  | Date / Sign |

Bruker Daltonics

### SmartFormula

| Formula                                                                          | Mass       | Error  | mSigma  | DbIEq | N rule | Electron Configuration |
|----------------------------------------------------------------------------------|------------|--------|---------|-------|--------|------------------------|
| C <sub>64</sub> H <sub>90</sub><br>Br <sub>2</sub> O <sub>8</sub>                | 1,144.4997 | 1.9993 | 78.8865 | 19.00 | ok     | odd                    |
| C <sub>64</sub> H <sub>84</sub><br>Br <sub>2</sub> N <sub>5</sub> O <sub>4</sub> | 1,144.4885 | 7.8204 | 81.9492 | 24.50 | ok     | even                   |

HRMS (MALDI-TOF, dctb)

1.6-PTE-tolane (5a)

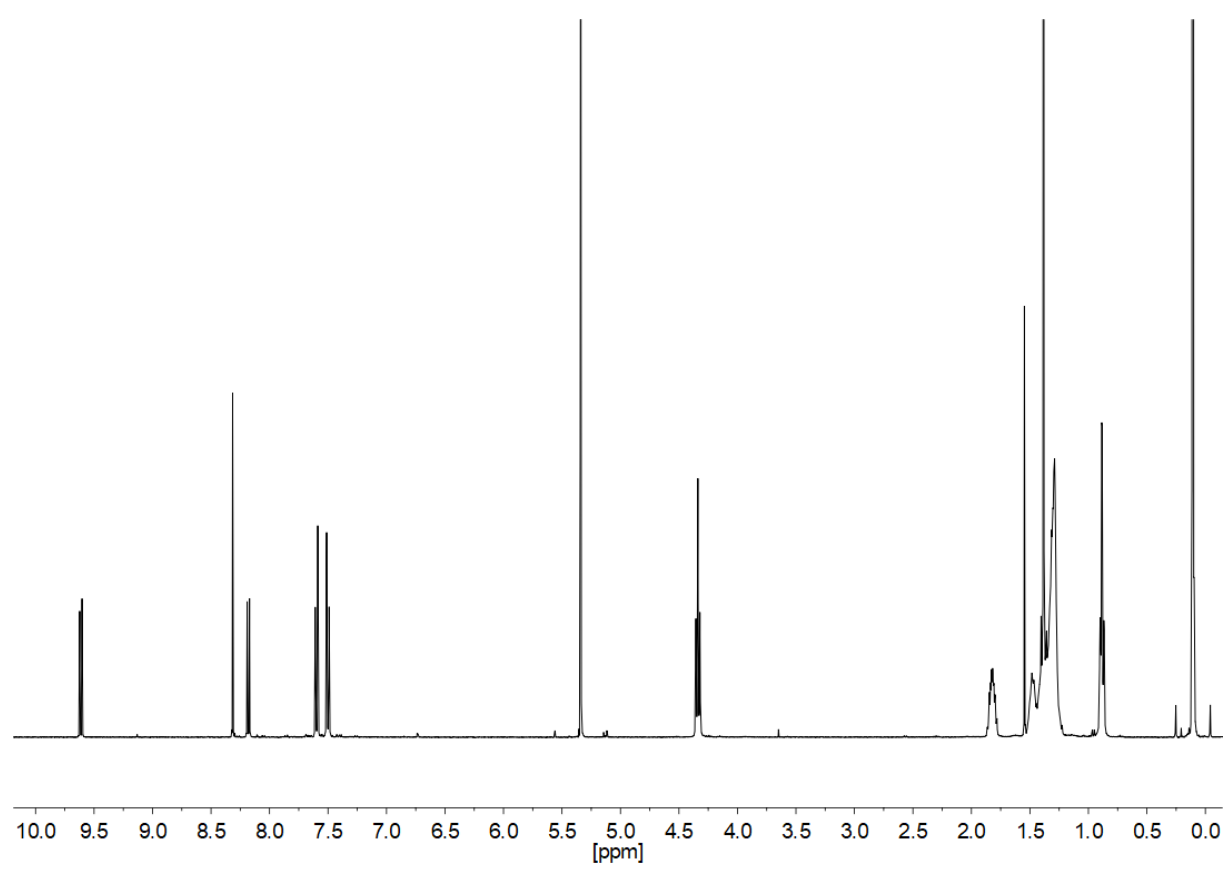

$^1\text{H}$  NMR (400 MHz,  $\text{CD}_2\text{Cl}_2$ , rt)

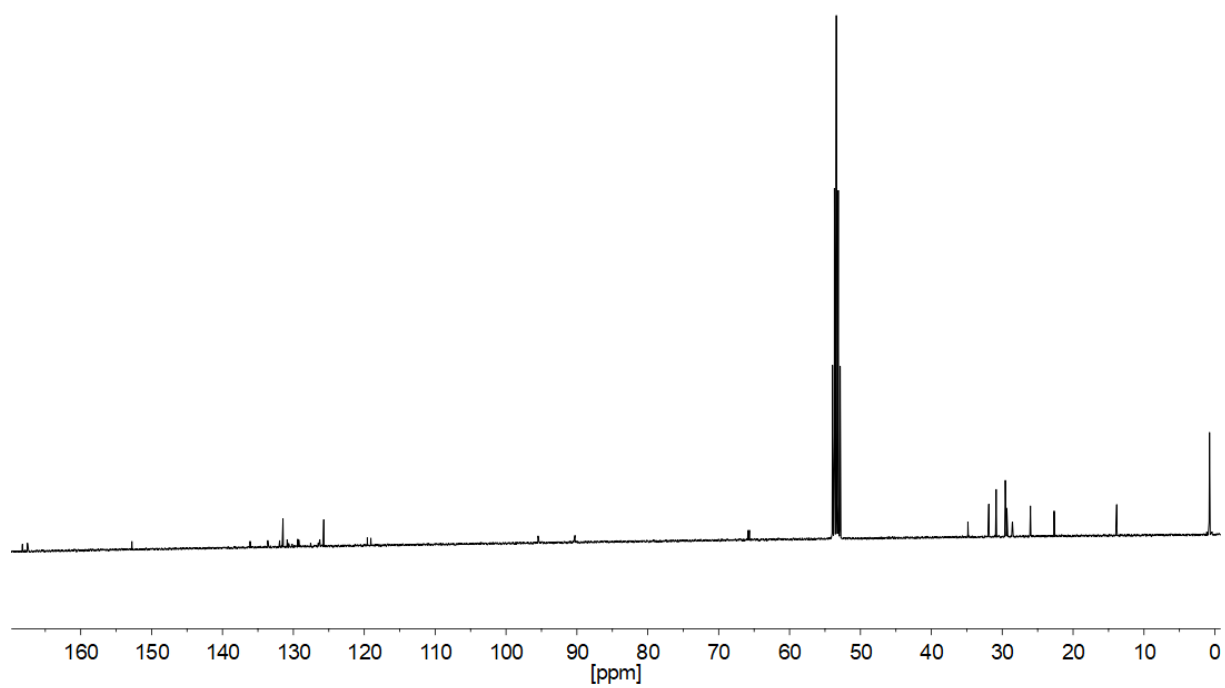

$^{13}\text{C}$  NMR (101 MHz,  $\text{CD}_2\text{Cl}_2$ , rt)

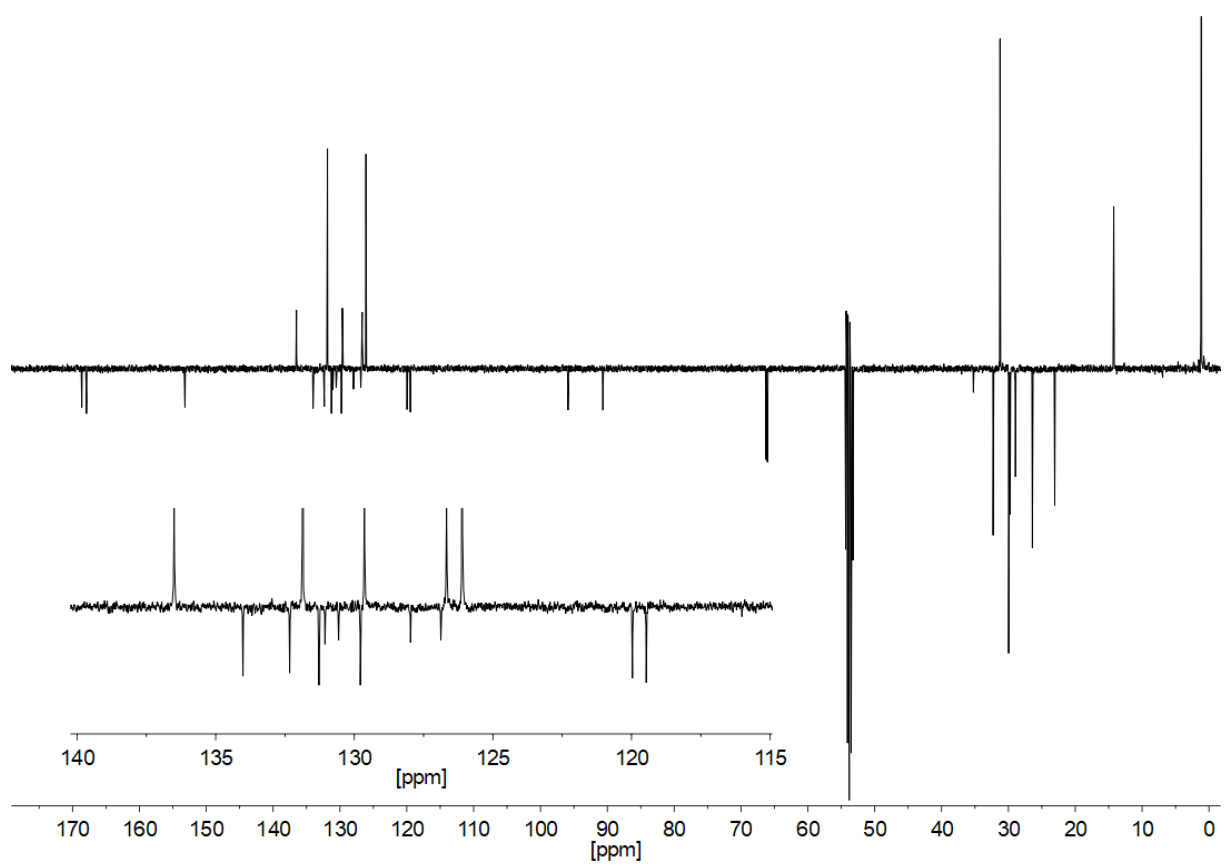

DEPTq135 NMR (101 MHz,  $\text{CD}_2\text{Cl}_2$ , rt)

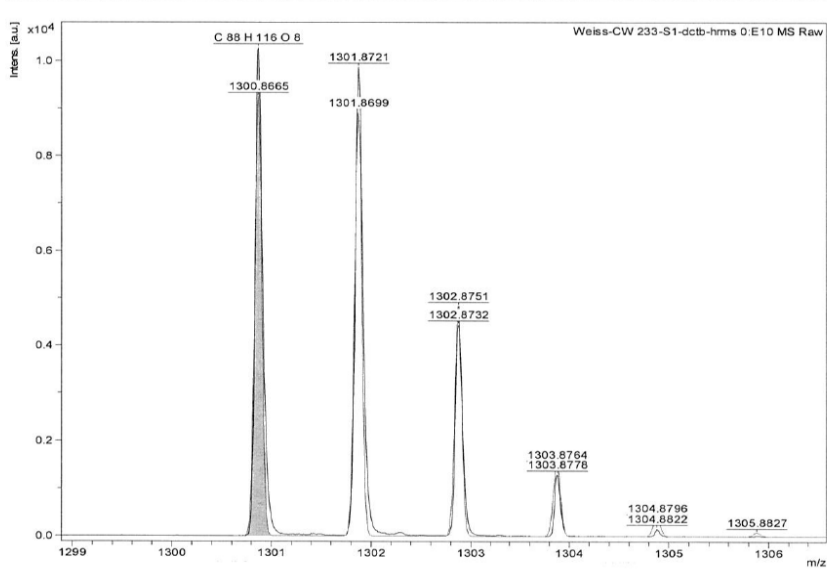

**Target**  
 Target type 0280781  
 Target serial number 1002000  
 Position E10

**Laser**  
 Laser beam attenuation 85  
 Laser beam focus 34  
 Laser repetition rate 2000 Hz  
 Number of shots 500

**Spectrometer**  
 positive voltage polarity POS  
 PIE delay 140 ns  
 Ion source voltage 1 23 kV  
 Ion source voltage 2 17.65 kV  
 Lens voltage 8.2 kV  
 Linear detector voltage 2.981 kV  
 Deflection on  
 Deflection mass

**MSMS parent mass**  
 LIFT voltage 1  
 LIFT voltage 2  
 LIFT 1 Pulser time depending on the parent mass  
 LIFT 2 Pulser time

Reflector voltage 1 21.1 kV  
 Reflector voltage 2 10.85 kV  
 Reflector detector voltage 2.367 kV

**Instrument**  
 Instrument type ultraflexTOF/TOF  
 Instrument serial 8275601 00592  
 Name of computer UTX-00592  
 Operator ID or name Don  
 flexControl version flexControl 3.4.135.0  
 flexAnalysis version 3.4.76.0

Date of Acquisition 2019-12-03T12:02:20.444+01:00 printed: 12/3/2019 12:06:59 PM  
 Acquisition method D:\Methods\flexControlMethods\Don-70-2100.par  
 Processing method  
 File Name D:\Data\2019\Hirsch-2019\Weiss-CW233-S1-dctb-hrms\0\_E10\1

|              |             |
|--------------|-------------|
| Performed by | Viewed by   |
| Date / Sign  | Date / Sign |

**Bruker Daltonics**

### SmartFormula

| Formula                                         | Mass       | Error  | mSigma  | DblEq | N rule | Electron Configuration |
|-------------------------------------------------|------------|--------|---------|-------|--------|------------------------|
| C <sub>88</sub> H <sub>116</sub> O <sub>8</sub> | 1,300.8665 | 0.3797 | 60.6217 | 31.00 | ok     | odd                    |

HRMS (MALDI-TOF, dctb)

**1.7-PTE-tolane (5b)**

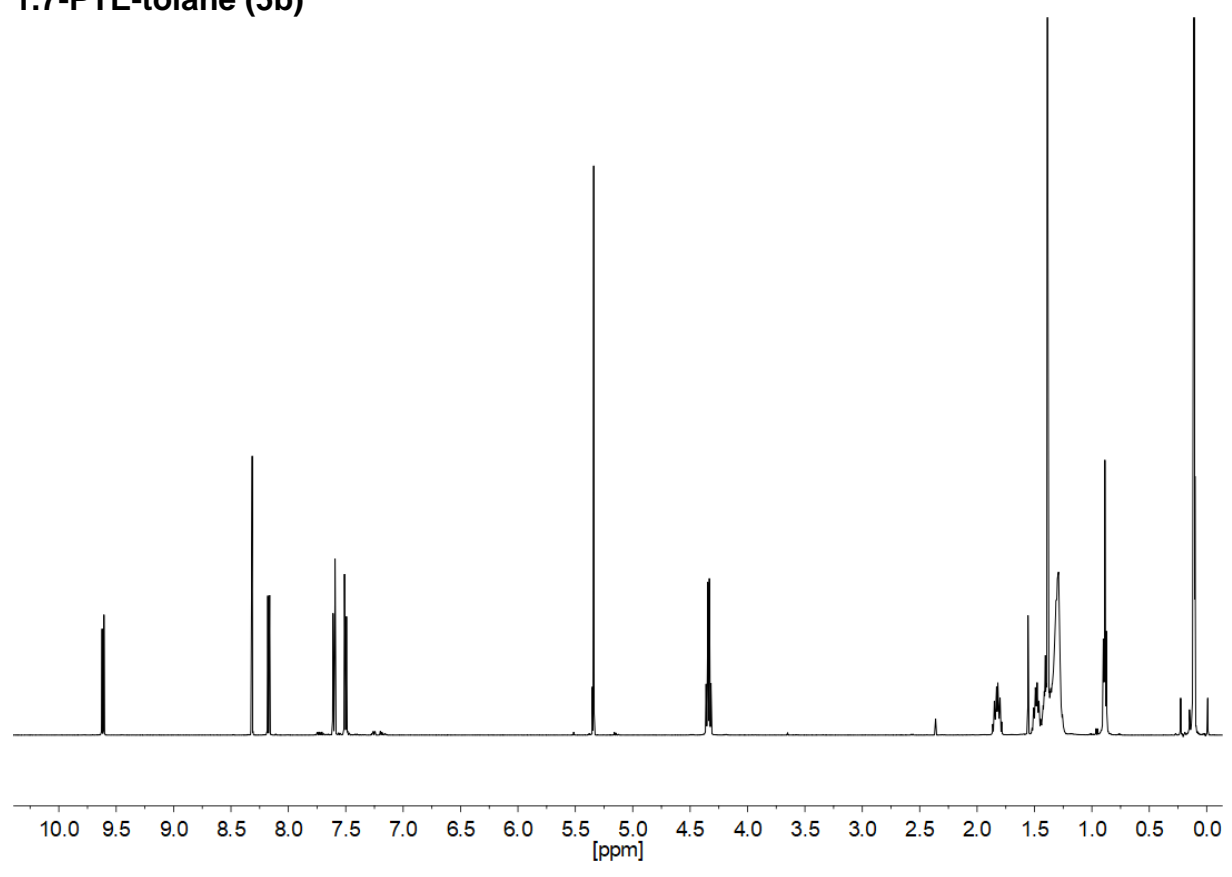

$^1\text{H}$  NMR (400 MHz,  $\text{CD}_2\text{Cl}_2$ , rt)

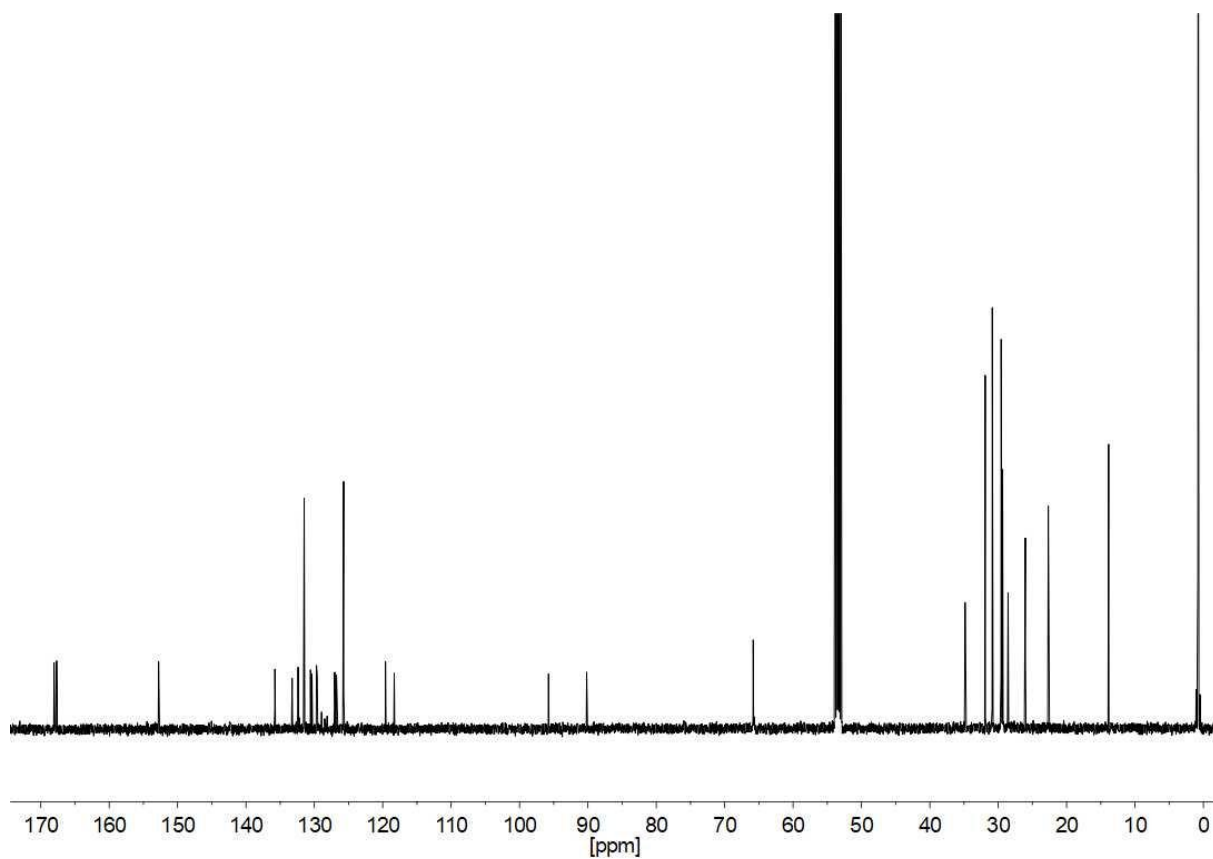

$^{13}\text{C}$  NMR (101 MHz,  $\text{CD}_2\text{Cl}_2$ , rt)

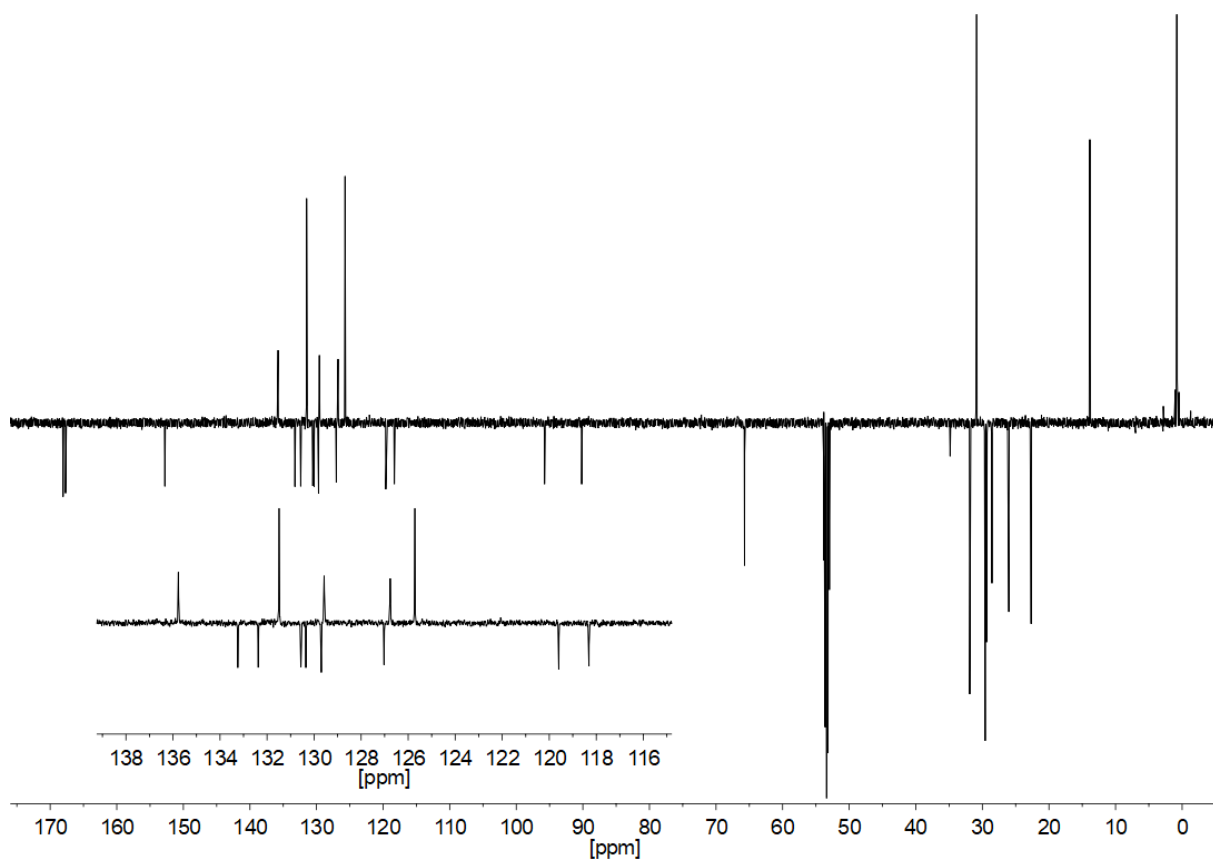

DEPTq135 NMR (101 MHz,  $\text{CD}_2\text{Cl}_2$ , rt)

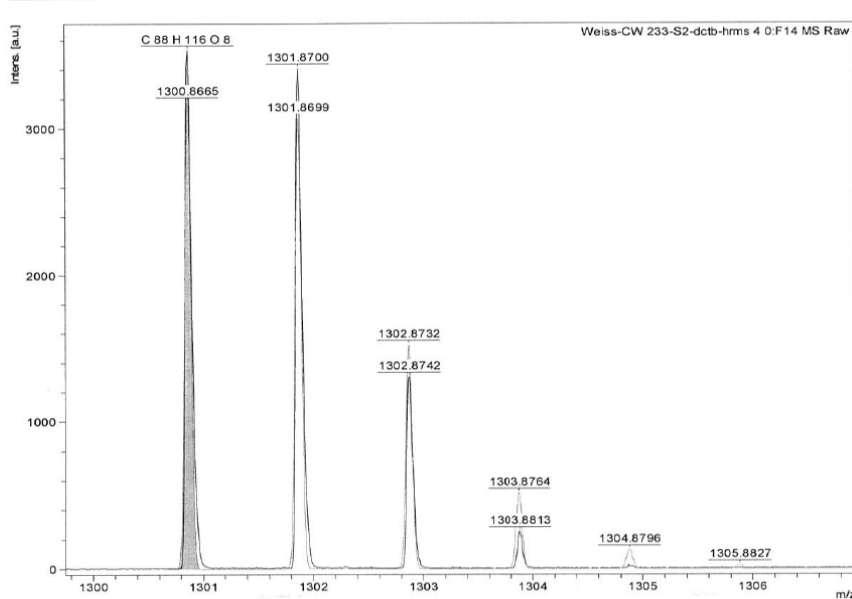

**Target**  
 Target type 0280781  
 Target serial number 1002000  
 Position F14

**Laser**  
 Laser beam attenuation 84  
 Laser beam focus 34  
 Laser repetition rate 2000 Hz  
 Number of shots 500

**Spectrometer**  
 positive voltage polarity POS  
 PIE delay 140 ns  
 Ion source voltage 1 20 kV  
 Ion source voltage 2 17.65 kV  
 Lens voltage 8.2 kV  
 Linear detector voltage 2.981 kV  
 Deflection on Deflection mass

MSMS parent mass  
 LIFT voltage 1  
 LIFT voltage 2  
 LIFT 1 Pulser time depending on the parent mass  
 LIFT 2 Pulser time

Reflector voltage 1 21.1 kV  
 Reflector voltage 2 10.85 kV  
 Reflector detector voltage 2.367 kV

**Instrument**  
 Instrument type ultraflexTOF/TOF  
 Instrument serial 8276601.00592  
 Name of computer UTX-00592  
 Operator ID or name Don  
 flexControl version flexControl 3.4.135.0  
 flexAnalysis version 3.4.76.0

Date of Acquisition 2019-12-03T12:23:24.164+01:00 printed: 12/3/2019 12:28:19 PM  
 Acquisition method D:\Methods\flexControl\Methods\Don-70-2100.par  
 Processing method  
 File Name D:\Data\2019\Hirsch-2019\Weiss-CW233-S2-dctb-hrms4\0\_F14\1

|              |             |
|--------------|-------------|
| Performed by | Viewed by   |
| Date / Sign  | Date / Sign |

**Bruker Daltonics**

### SmartFormula

| Formula                                         | Mass       | Error  | mSigma  | DblEq | N rule | Electron Configuration |
|-------------------------------------------------|------------|--------|---------|-------|--------|------------------------|
| C <sub>88</sub> H <sub>116</sub> O <sub>8</sub> | 1,300.8665 | 0.9828 | 19.5029 | 31.00 | ok     | odd                    |

HRMS (MALDI-TOF, dctb)

**1,6-PTE-(PPB)<sub>2</sub> (6a)**



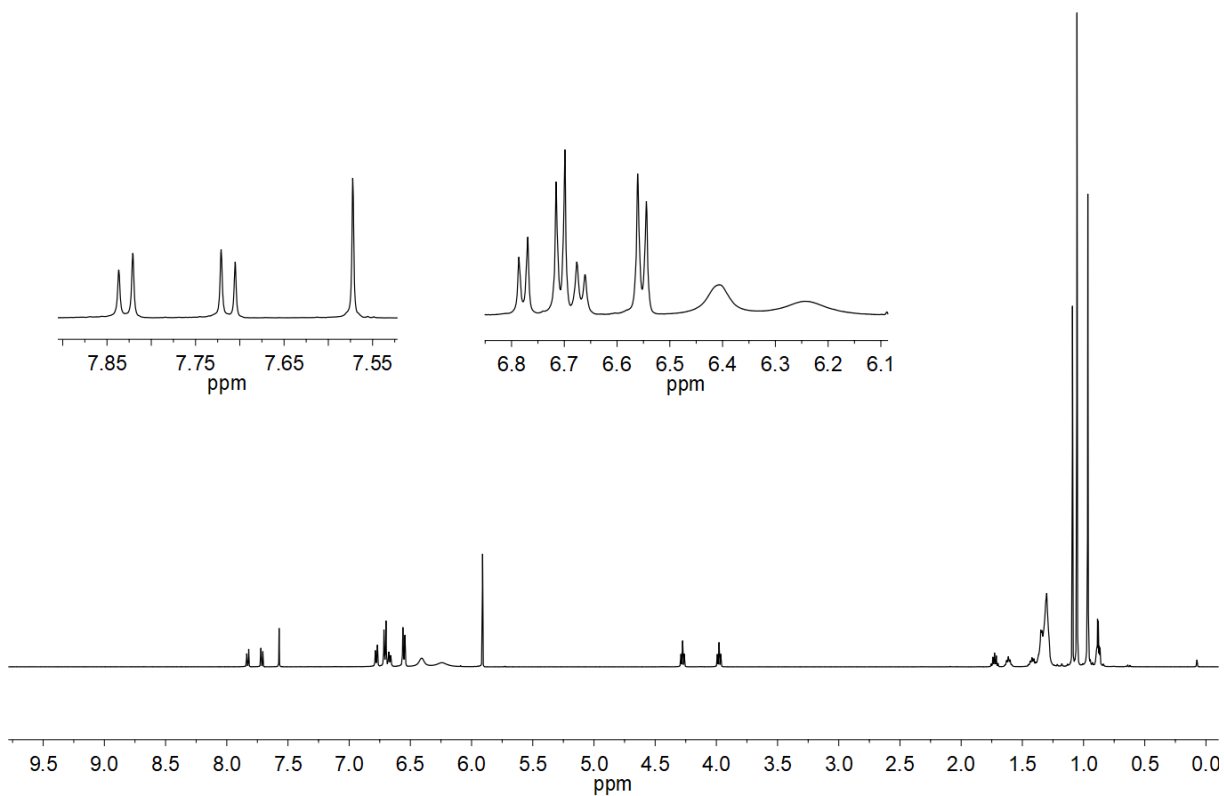

$^1\text{H}$  NMR (500 MHz,  $\text{C}_2\text{D}_2\text{Cl}_4$ , 130°C)

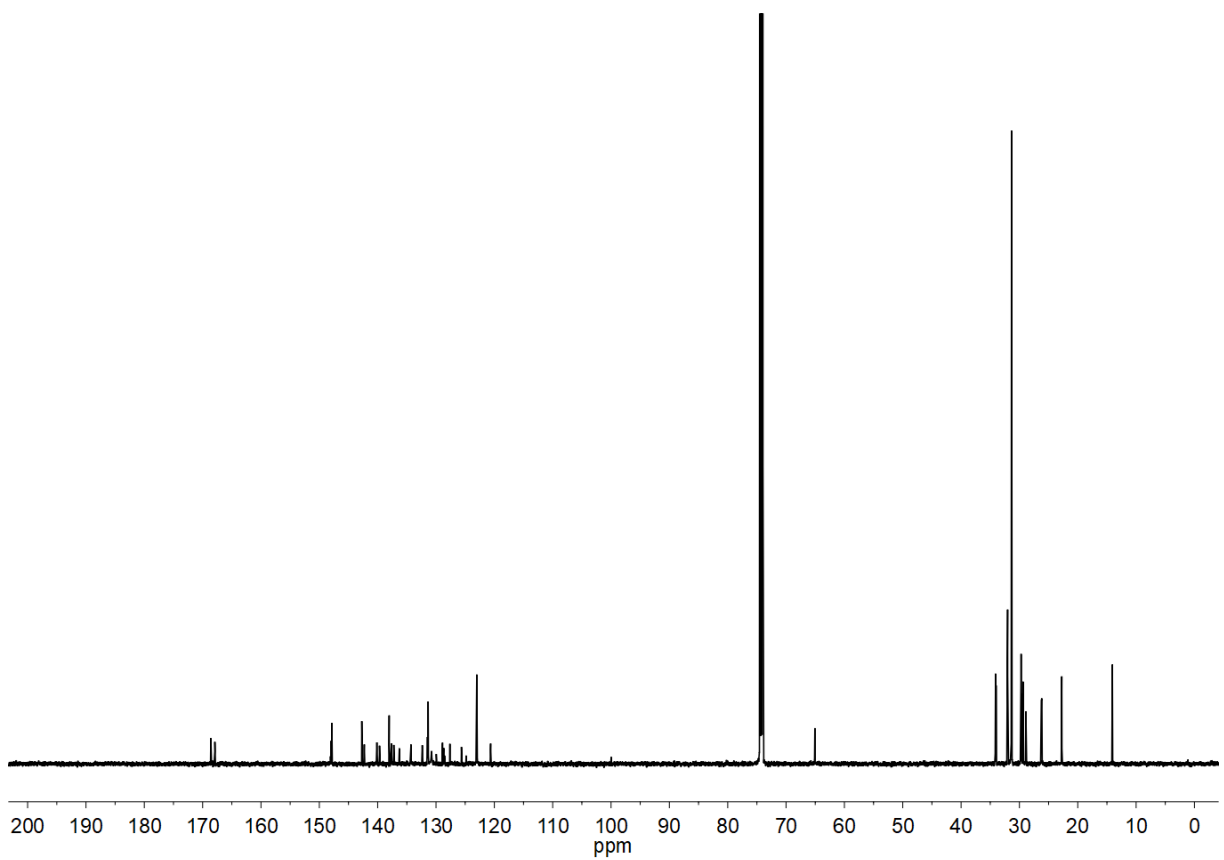

$^{13}\text{C}$  NMR (126 MHz,  $\text{C}_2\text{D}_2\text{Cl}_4$ , 130°C)

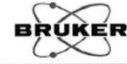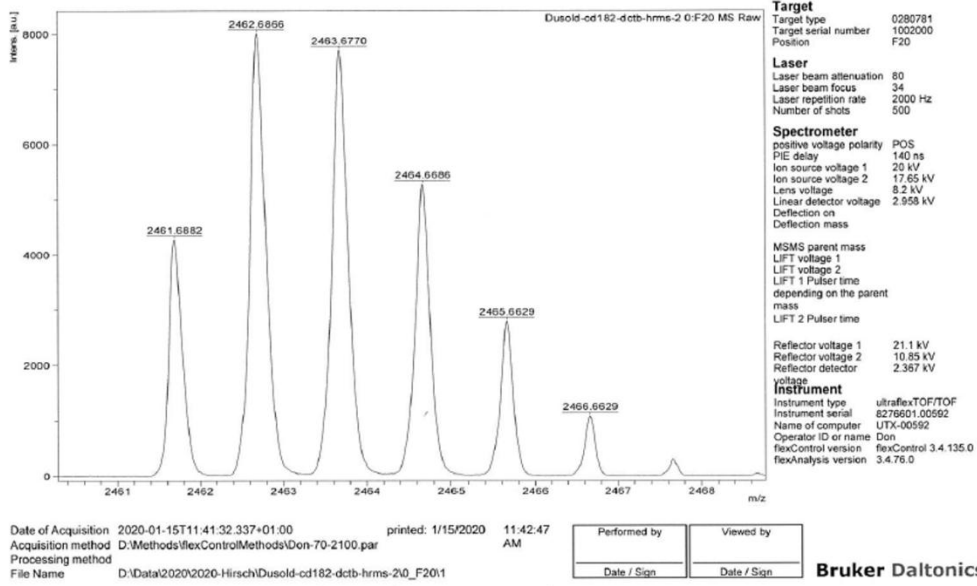

### SmartFormula

| Formula                                            | Mass       | Error  | mSigma  | DbIEq | N rule | Electron Configuration |
|----------------------------------------------------|------------|--------|---------|-------|--------|------------------------|
| C <sub>176</sub> H <sub>11</sub><br>O <sub>8</sub> | 2,461.6803 | 3.2347 | 24.8840 | 67.00 | ok     | odd                    |

HRMS (MALDI-TOF, dctb)

**1,7-PTE-(PPB)<sub>2</sub> (6b)**

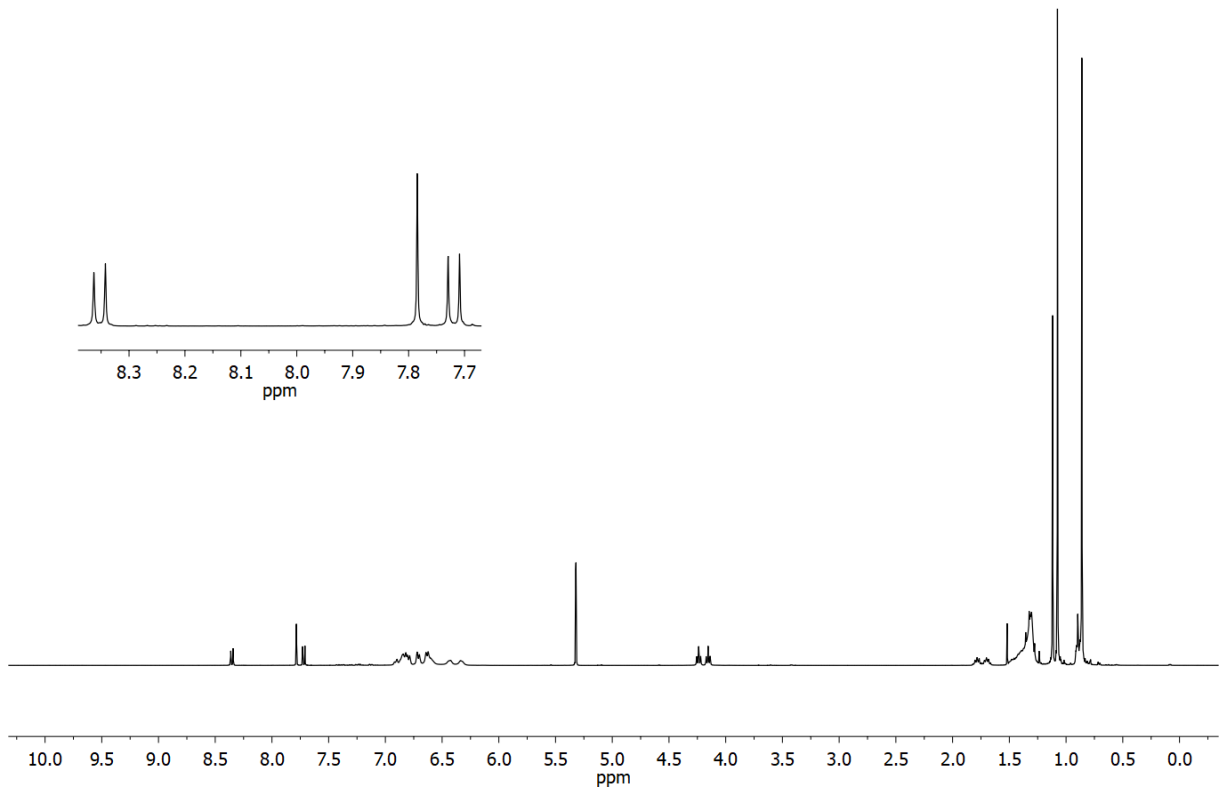

<sup>1</sup>H NMR (400 MHz, CD<sub>2</sub>Cl<sub>2</sub>, rt)

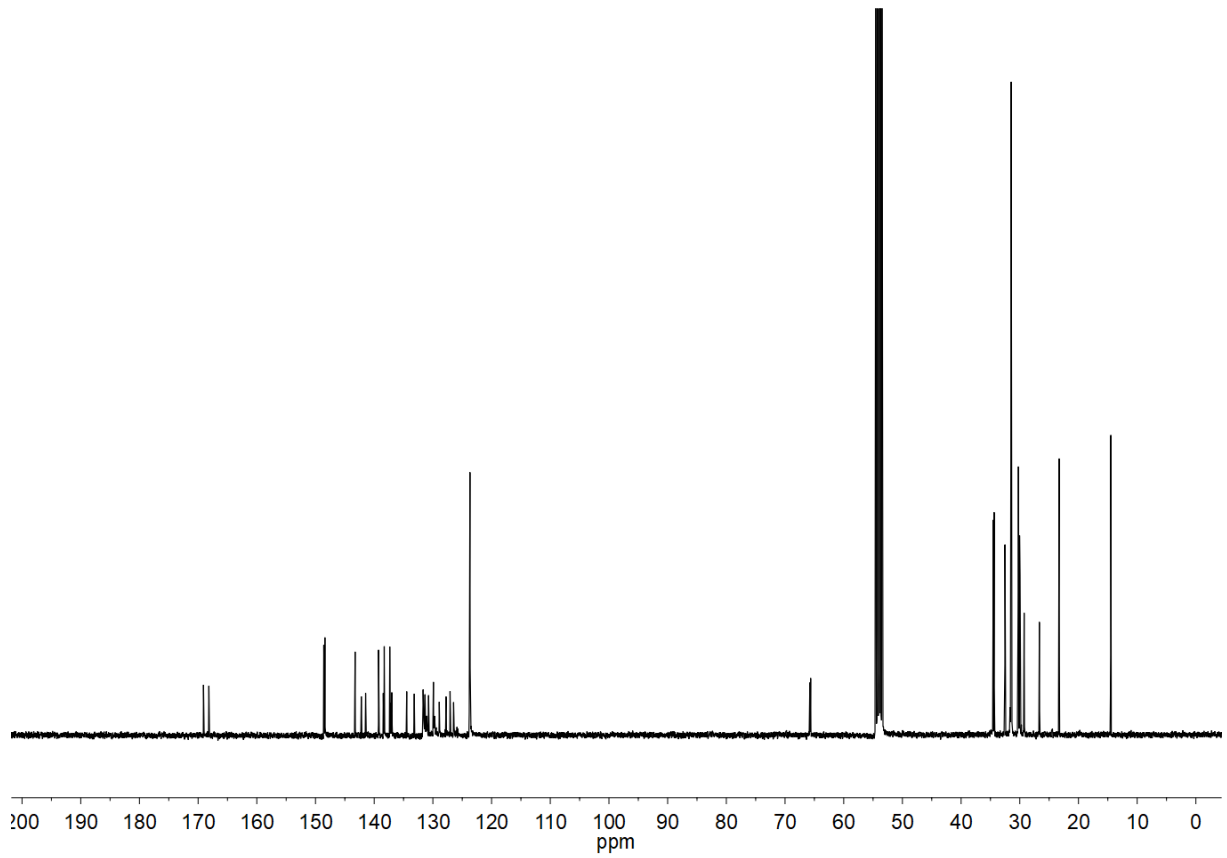

$^{13}\text{C}$  NMR (101 MHz,  $\text{CD}_2\text{Cl}_2$ , rt)

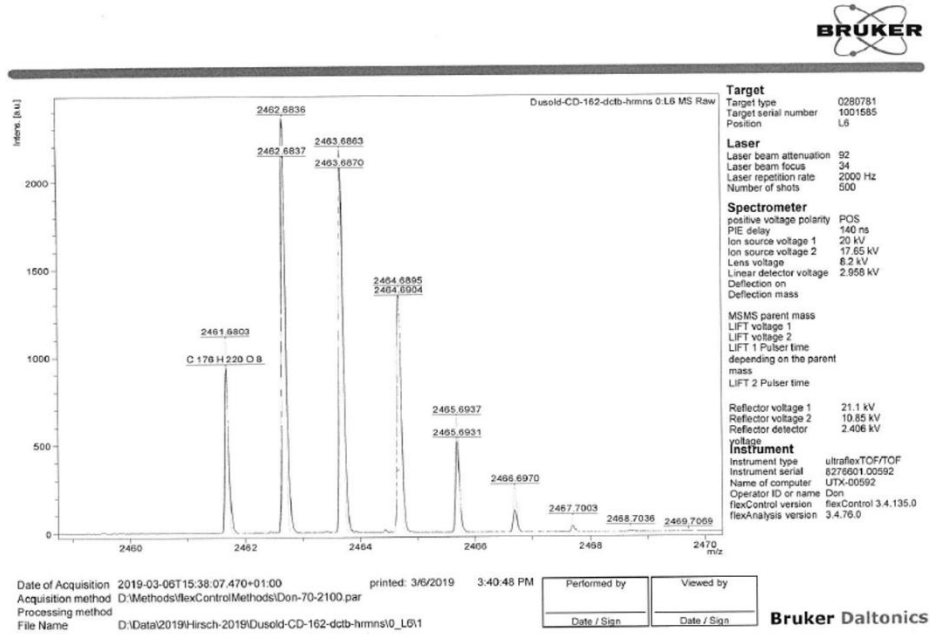

SmartFormula

| Formula         | Mass       | Error  | mSigma  | DbIEq | N rule | Electron Configuration |
|-----------------|------------|--------|---------|-------|--------|------------------------|
| C 176 H 220 O 8 | 2,461.6803 | 0.2624 | 72.2091 | 67.00 | ok     | odd                    |

HRMS (MALDI-TOF, dctb)

# 1,6-PDA-(PPB)<sub>2</sub> (8a)

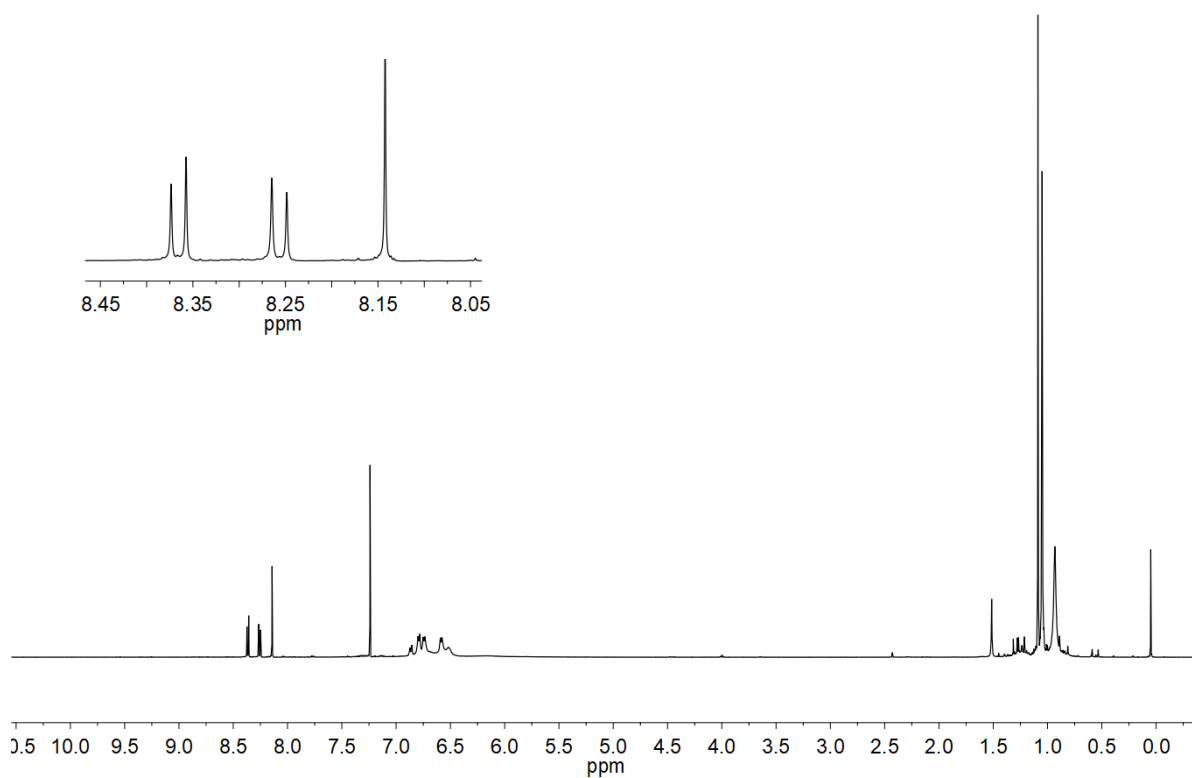

<sup>1</sup>H NMR (500 MHz, CDCl<sub>3</sub>, rt)

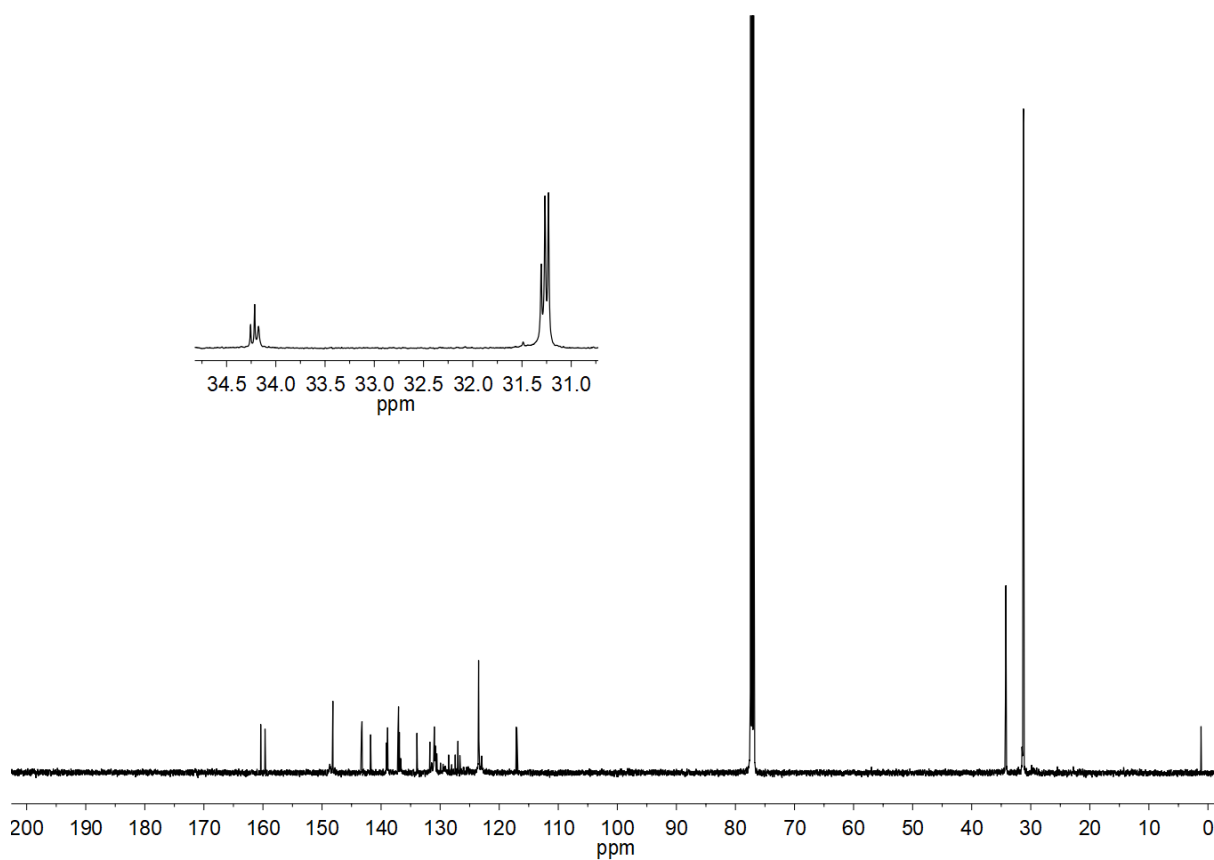

<sup>13</sup>C NMR (126 MHz, CDCl<sub>3</sub>, rt)

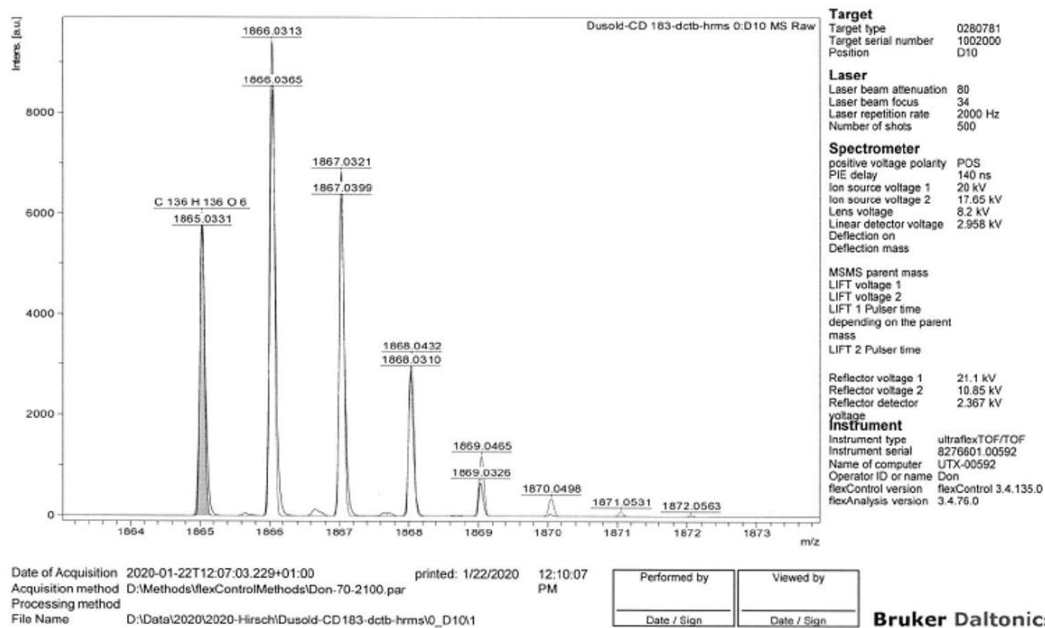

**SmartFormula**

| Formula                                          | Mass       | Error  | mSigma  | DbtEq | N rule | Electron Configuration |
|--------------------------------------------------|------------|--------|---------|-------|--------|------------------------|
| C <sub>136</sub> H <sub>136</sub> O <sub>6</sub> | 1,865.0331 | 0.9917 | 42.6932 | 69.00 | ok     | odd                    |

HRMS (MALDI-TOF, dctb)

**1,7-PDA-(PPB)<sub>2</sub> (8b)**

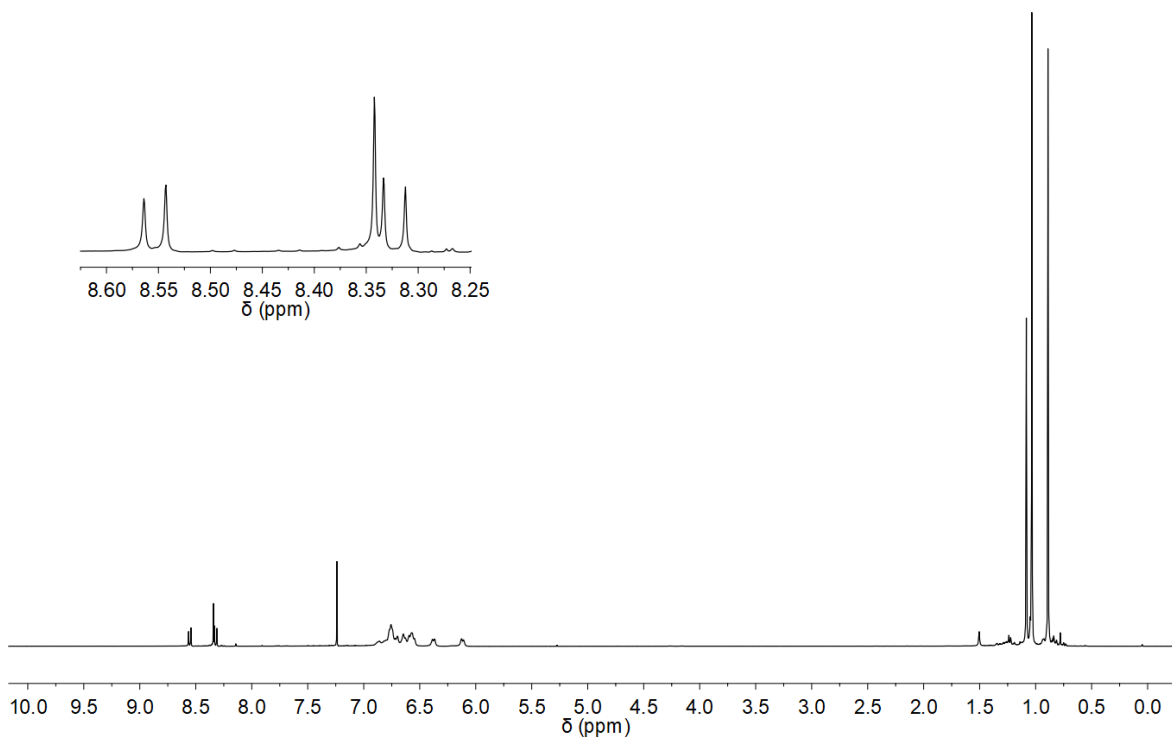

<sup>1</sup>H NMR (400 MHz, CDCl<sub>3</sub>, rt)

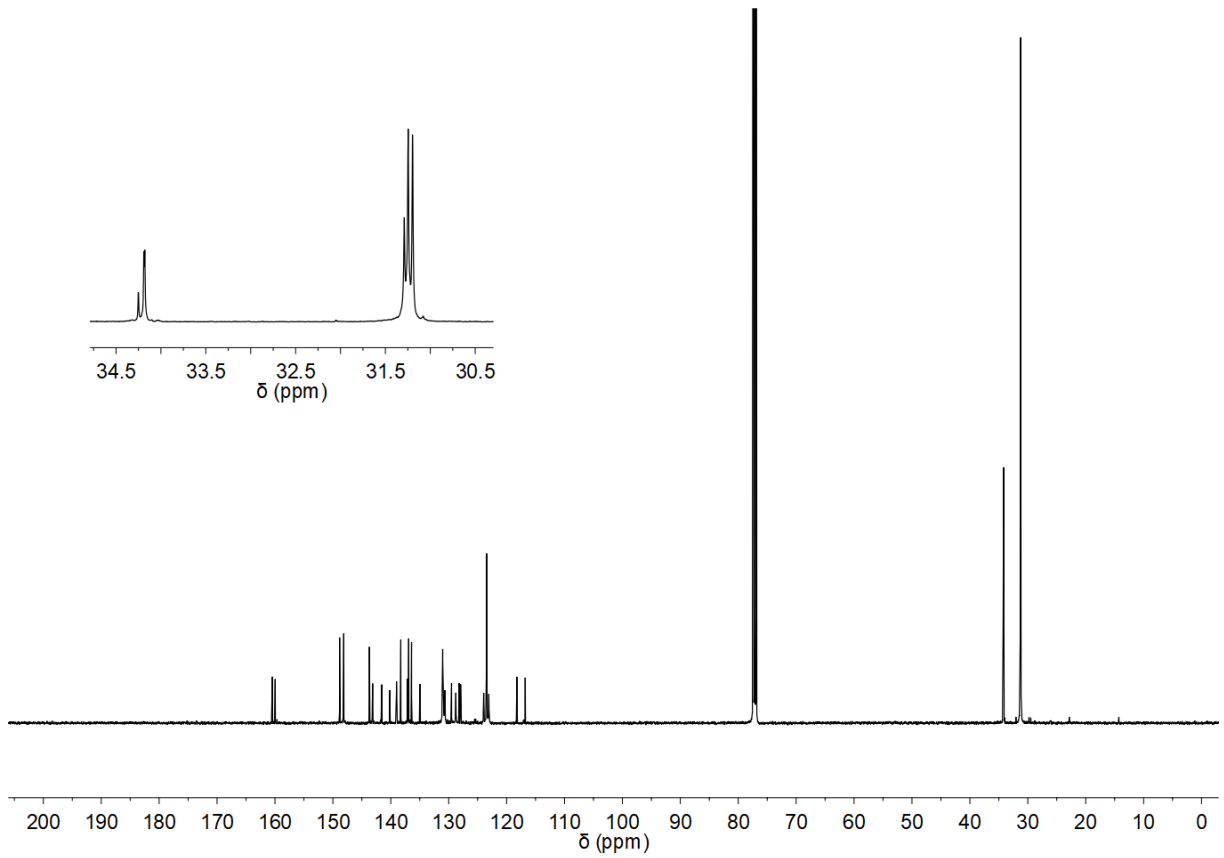

<sup>13</sup>C NMR (126 MHz, CDCl<sub>3</sub>, rt)

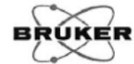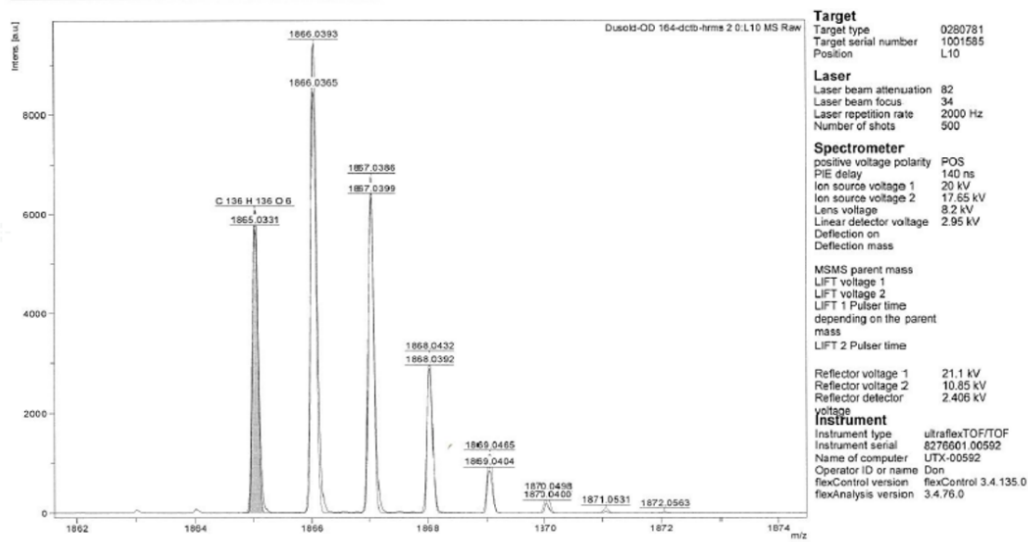

**Target**  
 Target type 0289781  
 Target serial number 1001585  
 Position L10

**Laser**  
 Laser beam attenuation 82  
 Laser beam focus 34  
 Laser repetition rate 2000 Hz  
 Number of shots 500

**Spectrometer**  
 positive voltage polarity POS  
 PIE delay 140 ns  
 Ion source voltage 1 20 kV  
 Ion source voltage 2 17.65 kV  
 Lens voltage 8.2 kV  
 Linear detector voltage 2.95 kV  
 Deflection on Deflection mass

**MSMS parent mass**  
 LIFT voltage 1  
 LIFT voltage 2  
 LIFT 1 Pulser time depending on the parent mass  
 LIFT 2 Pulser time

**Reflector voltage 1** 21.1 kV  
**Reflector voltage 2** 10.85 kV  
**Reflector detector voltage** 2.406 kV

**Instrument**  
 Instrument type ultraflexTOF/TOF  
 Instrument serial 8276901\_00592  
 Name of computer UTX-00592  
 Operator ID or name Don  
 flexControl version flexControl 3.4.135.0  
 flexAnalysis version 3.4.76.0

Date of Acquisition 2019-03-14T13:31:00.500+01:00 printed: 3/14/2019 1:34:13 PM  
 Acquisition method D:\Methods\flexControlMethods\Don-70-2100.par  
 Processing method  
 File Name D:\Data\2019\Hirsch-2019\Disold-OD 164-dctb-hrms 210\_L101

|              |             |
|--------------|-------------|
| Performed by | Viewed by   |
| Date / Sign  | Date / Sign |

Bruker Daltonics

SmartFormula

| Formula                                          | Mass       | Error  | mSigma  | DblEq | N rule | Electron Configuration |
|--------------------------------------------------|------------|--------|---------|-------|--------|------------------------|
| C <sub>136</sub> H <sub>136</sub> O <sub>6</sub> | 1,865.0331 | 1.6825 | 36.5644 | 69.00 | ok     | odd                    |

HRMS (MALDI-TOF, dctb)

**1,6-PDI-(PPB)<sub>2</sub> (7a)**

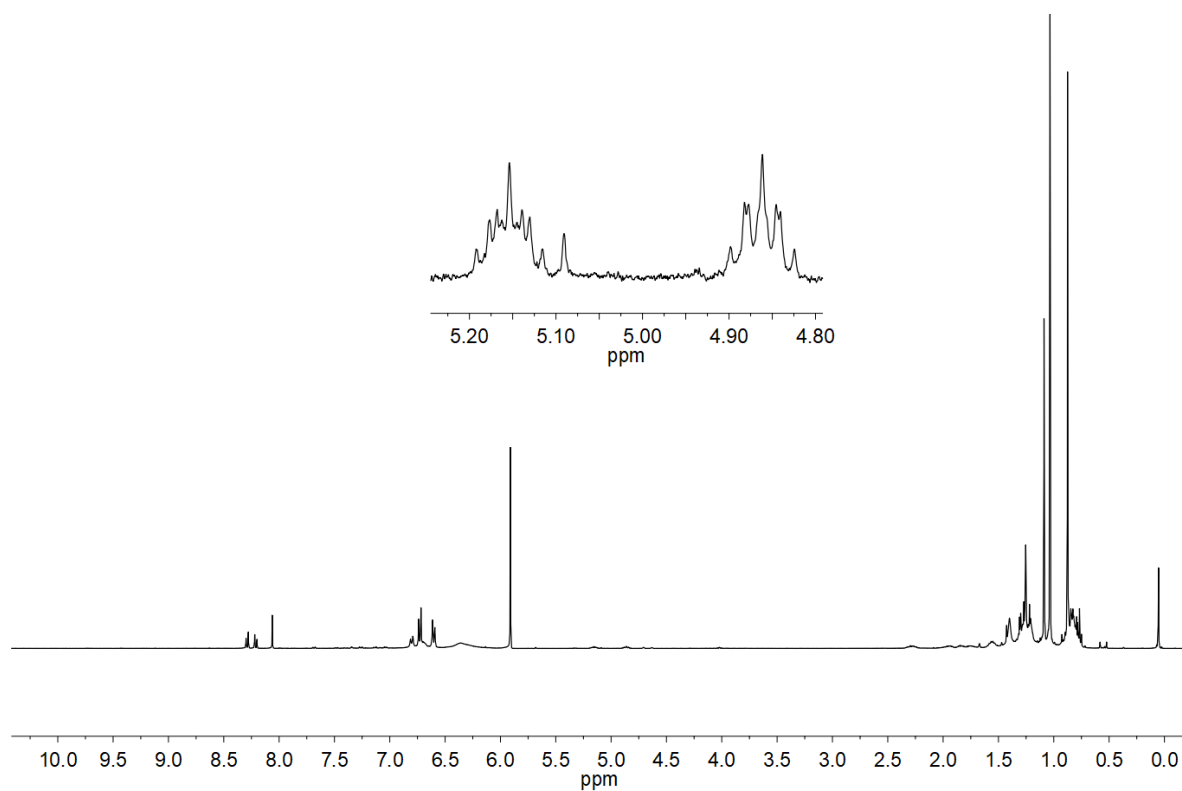

<sup>1</sup>H NMR (400 MHz, C<sub>2</sub>D<sub>2</sub>Cl<sub>4</sub>, 100°C)

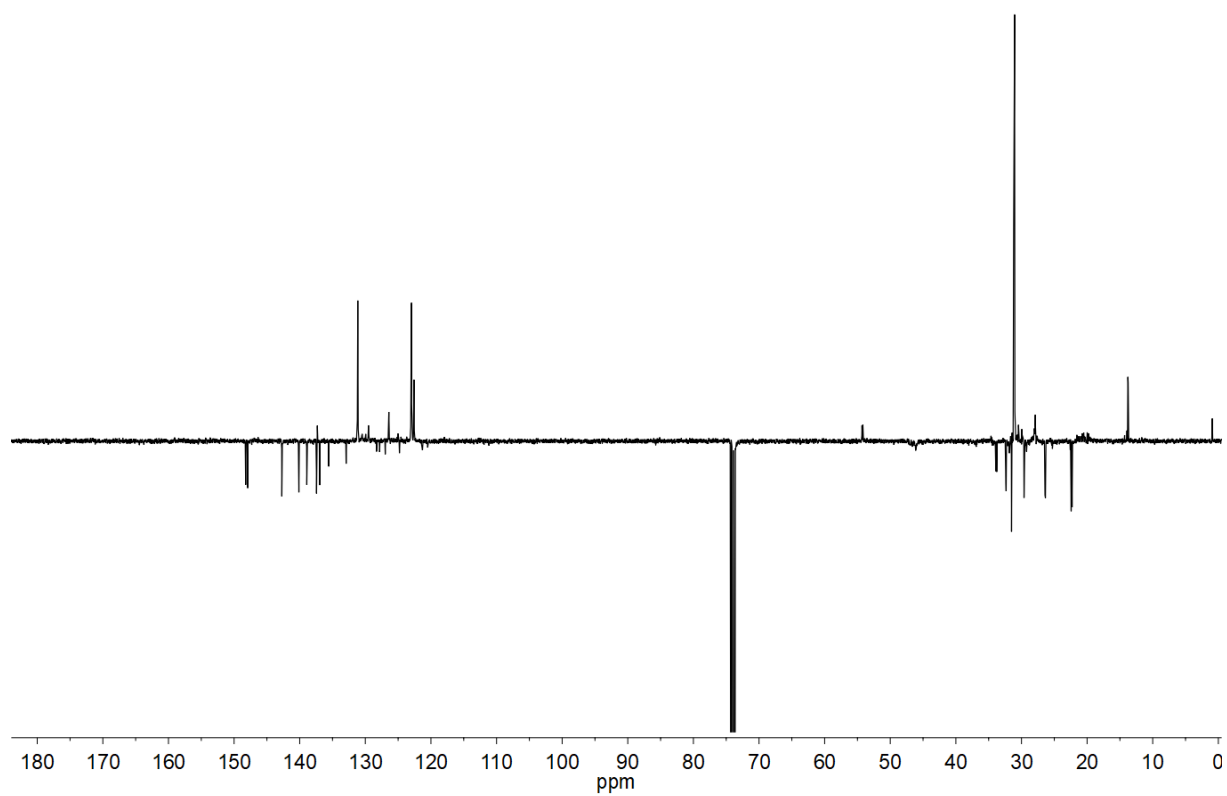

DEPTq135 NMR (101 MHz, C<sub>2</sub>D<sub>2</sub>Cl<sub>4</sub>, 100°C)

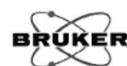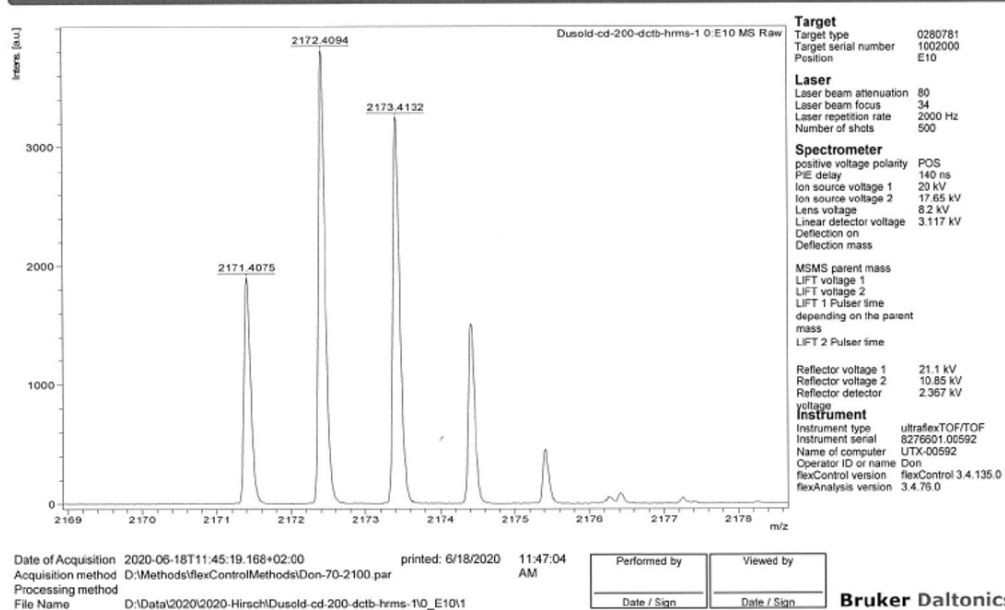

### SmartFormula

| Formula                                                         | Mass       | Error  | mSigma   | DbtEq | N rule | Electron Configuration |
|-----------------------------------------------------------------|------------|--------|----------|-------|--------|------------------------|
| C <sub>158</sub> H <sub>182</sub> N <sub>2</sub> O <sub>4</sub> | 2,171.4094 | 0.8733 | 197.7220 | 69.00 | ok     | odd                    |

HRMS (MALDI-TOF, dctb)

**1,7-PDI-(PPB)<sub>2</sub> (7b)**

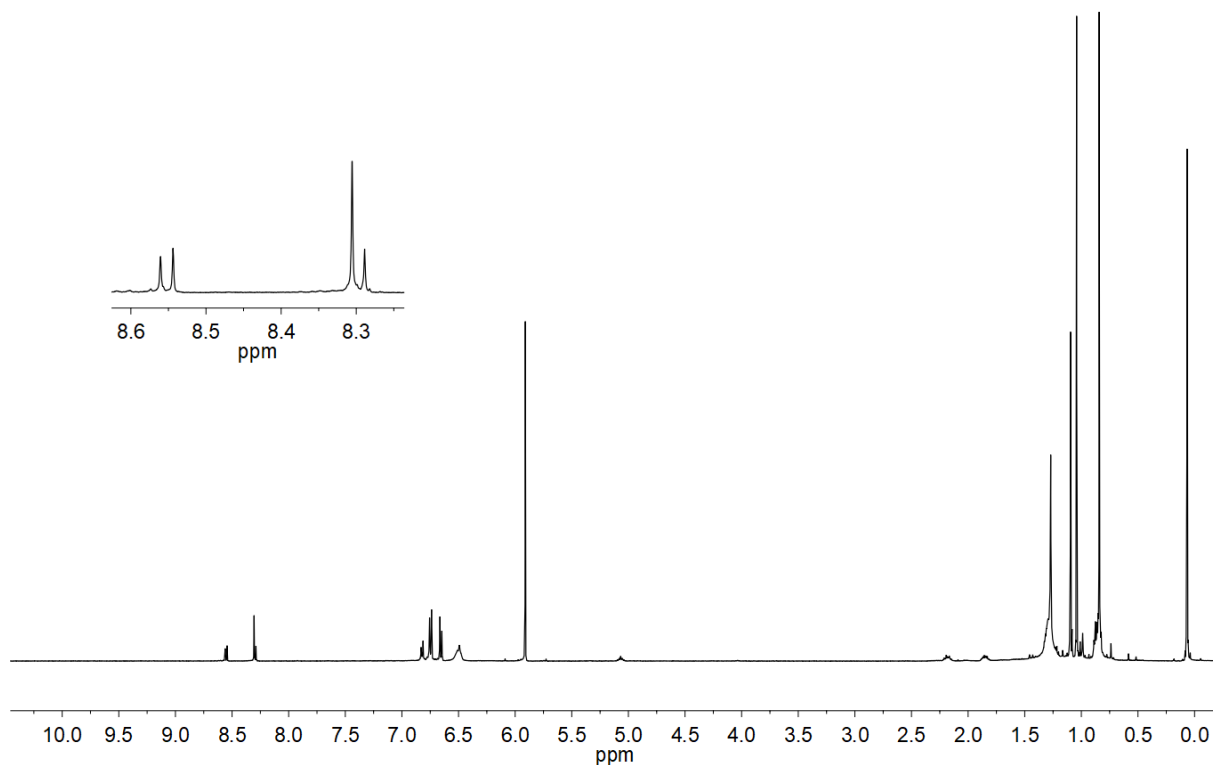

<sup>1</sup>H NMR (500 MHz, C<sub>2</sub>D<sub>2</sub>Cl<sub>4</sub>, 120°C)



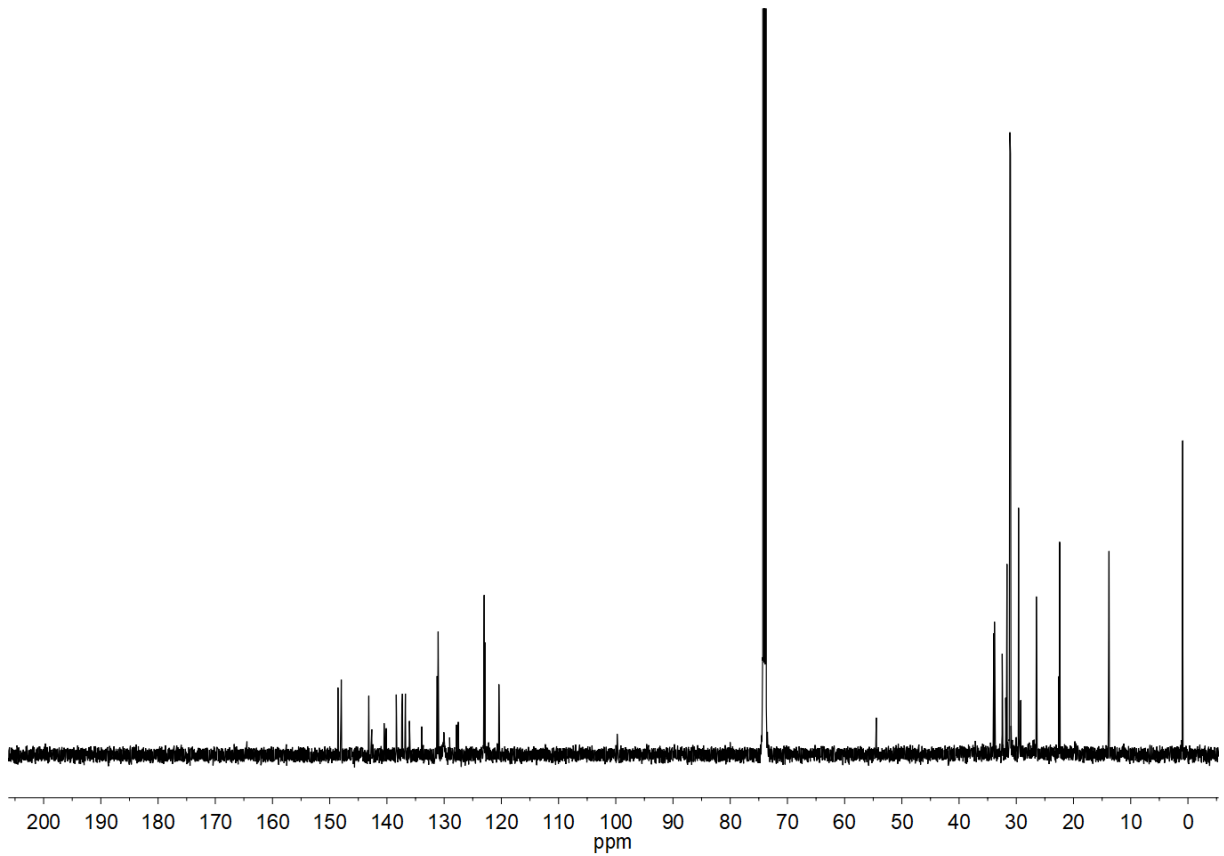

$^{13}\text{C}$  NMR (126 MHz,  $\text{C}_2\text{D}_2\text{Cl}_4$ ,  $110^\circ\text{C}$ )

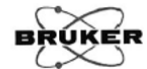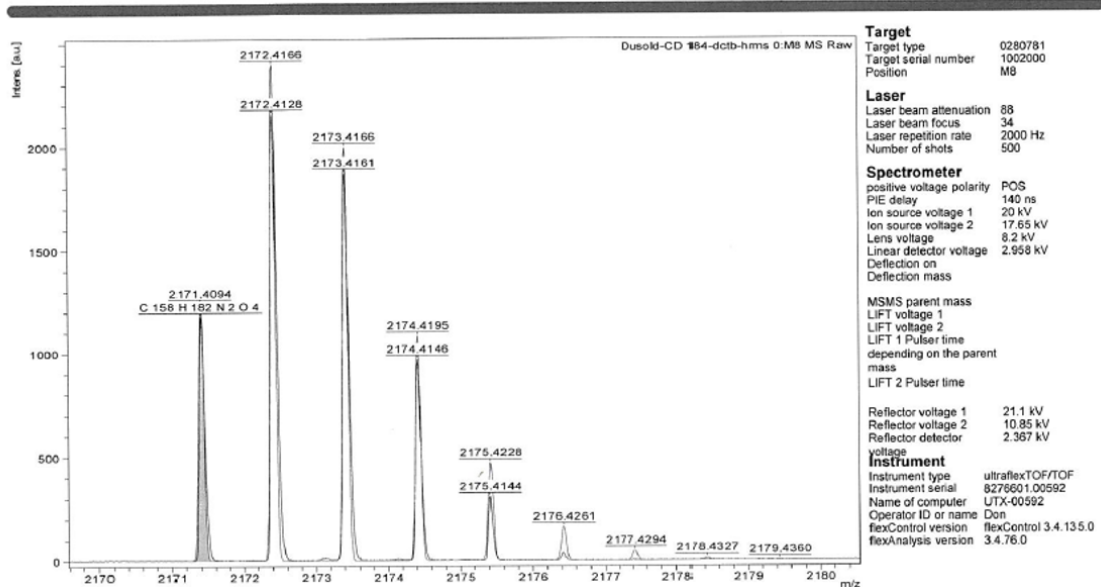

**Target**  
 Target type 0280781  
 Target serial number 1002000  
 Position M8

**Laser**  
 Laser beam attenuation 88  
 Laser beam focus 34  
 Laser repetition rate 2000 Hz  
 Number of shots 500

**Spectrometer**  
 positive voltage polarity POS  
 PIE delay 140 ns  
 Ion source voltage 1 20 kV  
 Ion source voltage 2 17.65 kV  
 Lens voltage 8.2 kV  
 Linear detector voltage 2.958 kV  
 Deflection on  
 Deflection mass

**MSMS parent mass**  
 LIFT voltage 1  
 LIFT voltage 2  
 LIFT 1 Pulser time depending on the parent mass  
 LIFT 2 Pulser time

**Instrument**  
 Reflecter voltage 1 21.1 kV  
 Reflecter voltage 2 10.85 kV  
 Reflecter detector voltage 2.357 kV  
 Instrument type ultraflexTOF/TOF  
 Instrument serial 8275601.00592  
 Name of computer LTX-00592  
 Operator ID or name Don  
 flexControl version flexControl 3.4.135.0  
 flexAnalysis version 3.4.76.0

Date of Acquisition 2020-01-21T16:11:22.193+01:00 printed: 1/21/2020 4:14:45 PM  
 Acquisition method D:\Methods\flexControlMethods\Don-70-2100.par  
 Processing method  
 File Name D:\Data\2020\2020-Hirsch\I\usold-CD184-dctb-hrms\0\_M81

|              |             |
|--------------|-------------|
| Performed by | Viewed by   |
| Date / Sign  | Date / Sign |

**Bruker Daltonics**

**SmartFormula**

| Formula                                                         | Mass       | Error  | mSigma  | DbEq  | N rule | Electron Configuration |
|-----------------------------------------------------------------|------------|--------|---------|-------|--------|------------------------|
| C <sub>158</sub> H <sub>182</sub> N <sub>2</sub> O <sub>4</sub> | 2,171.4094 | 1.4022 | 63.5998 | 69.00 | ok     | odd                    |

HRMS (MALDI-TOF, dctb)

S4. UV/Vis and fluorescence data:

**PDI-tolane (2)**

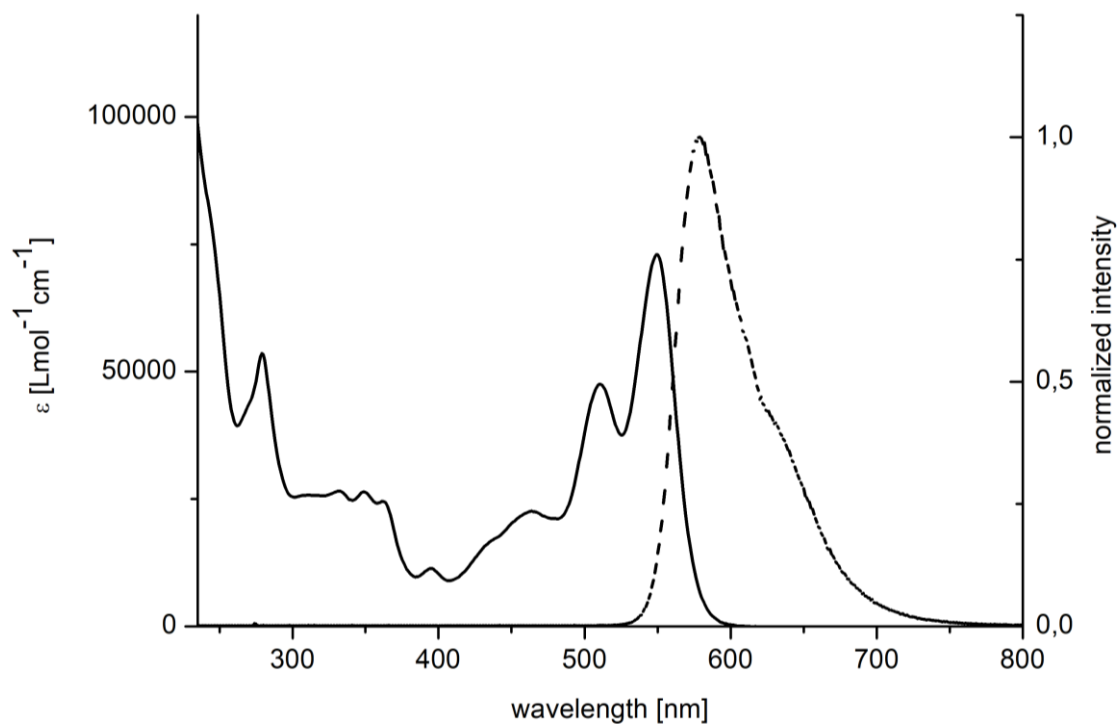

**PDI-PPB (3)**

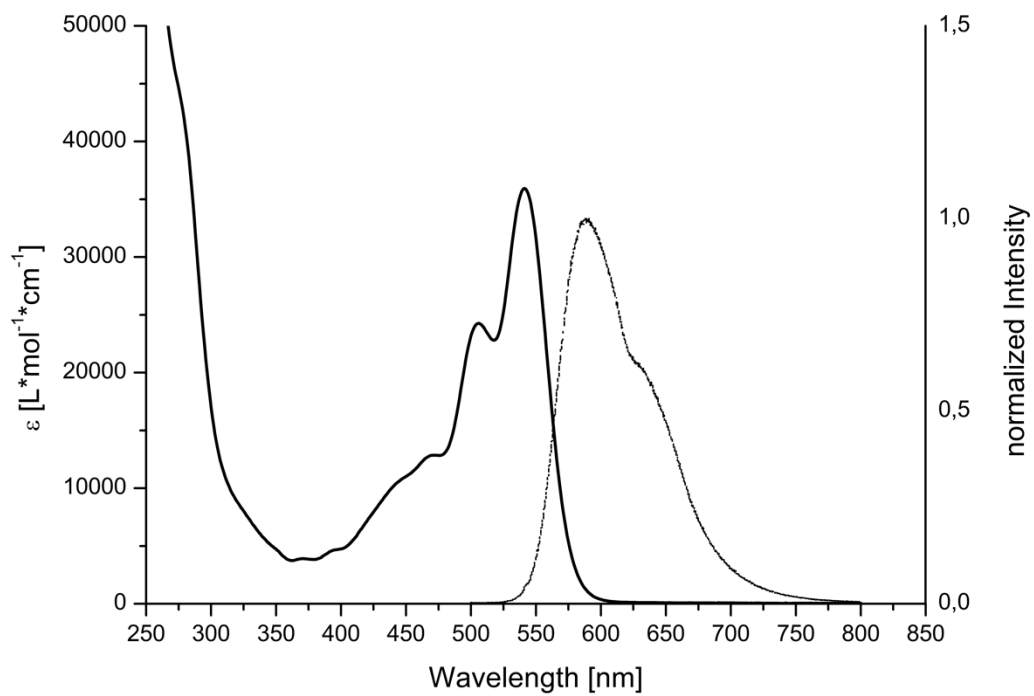

### PTE-(Br)<sub>2</sub> (4)

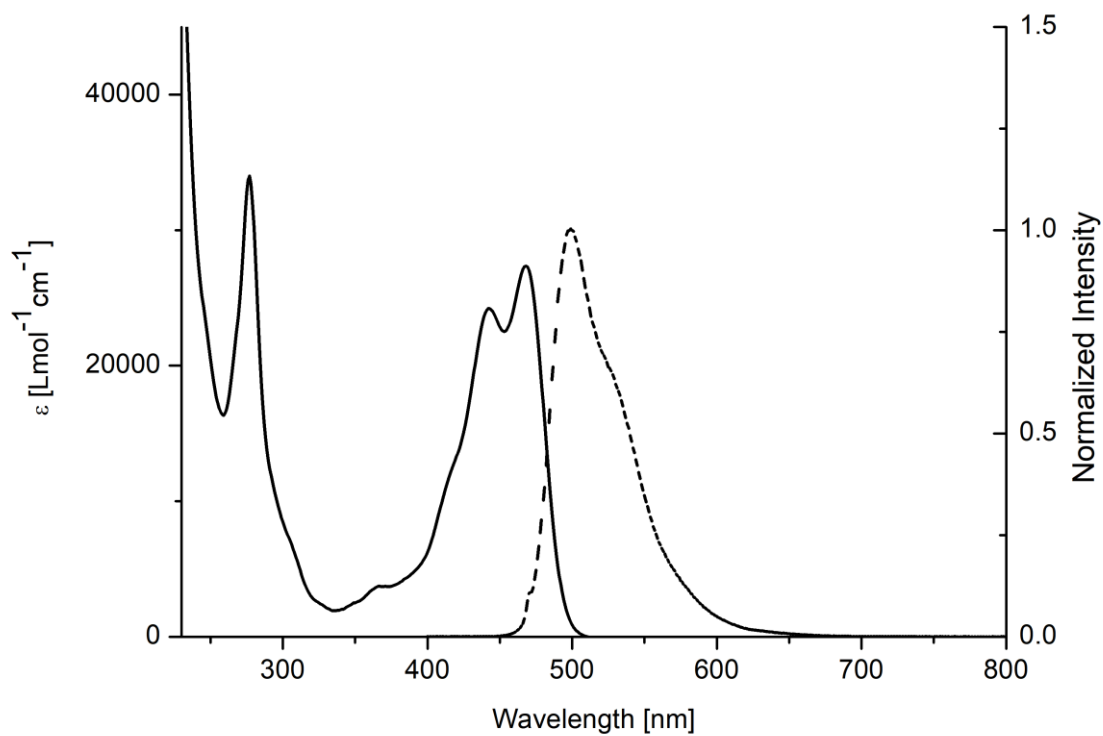

### PTE-tolane (5a)

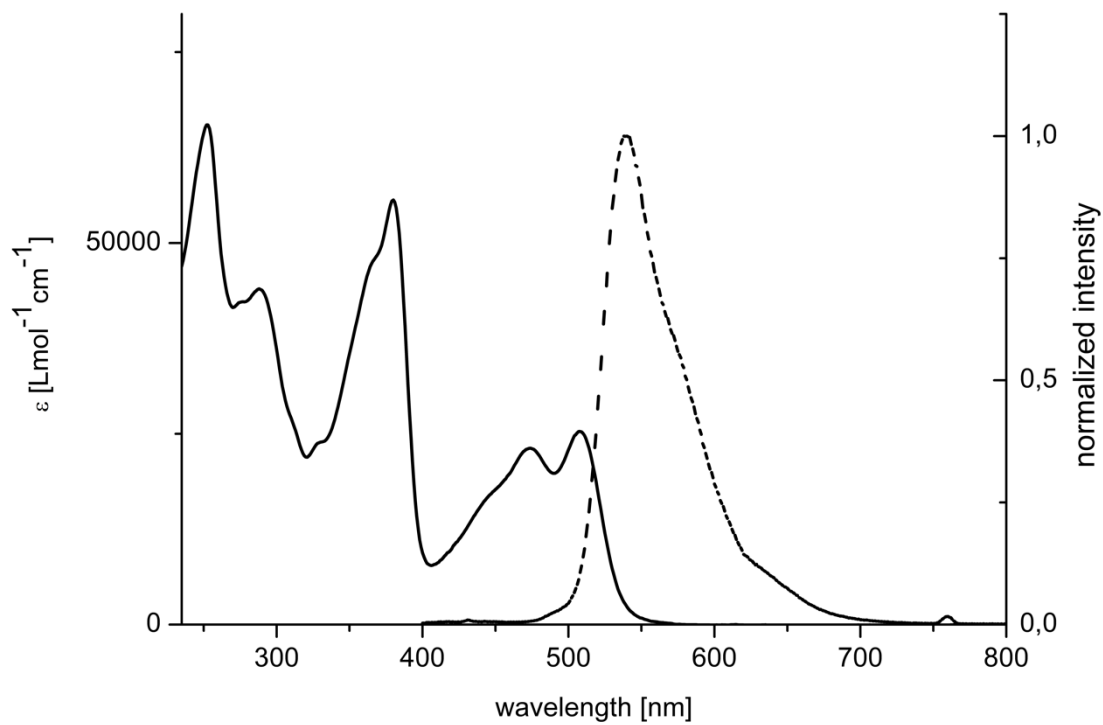

### PTE-tolane (5b)

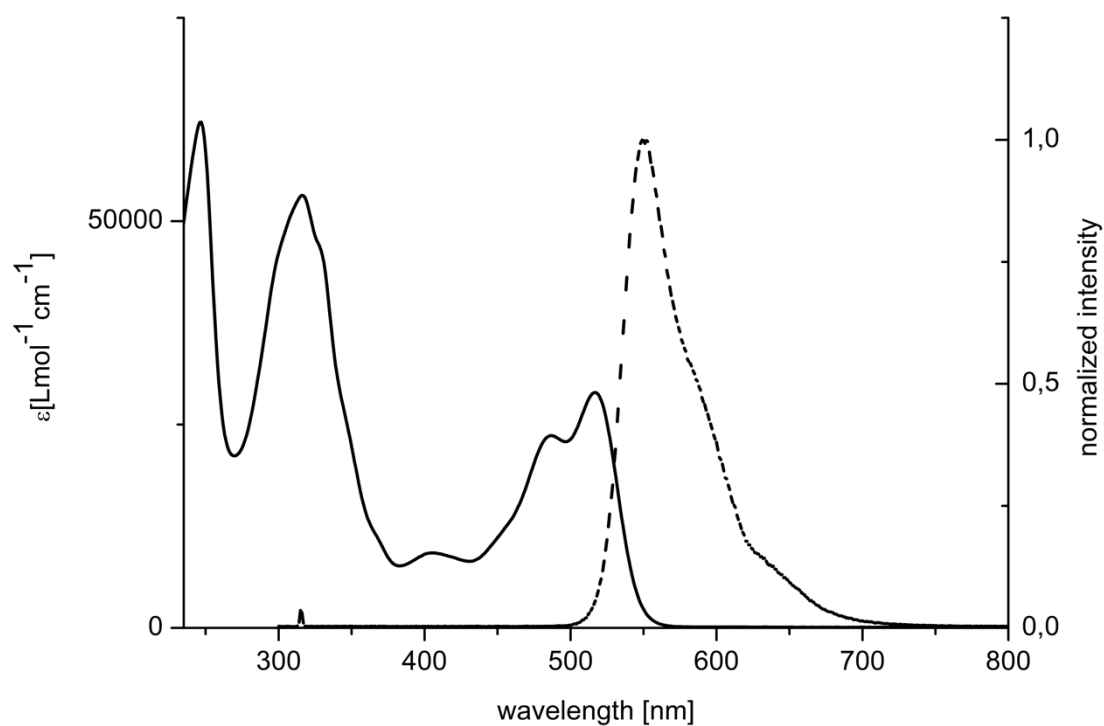

### 1,6-PTE-(PPB)<sub>2</sub> (6a)

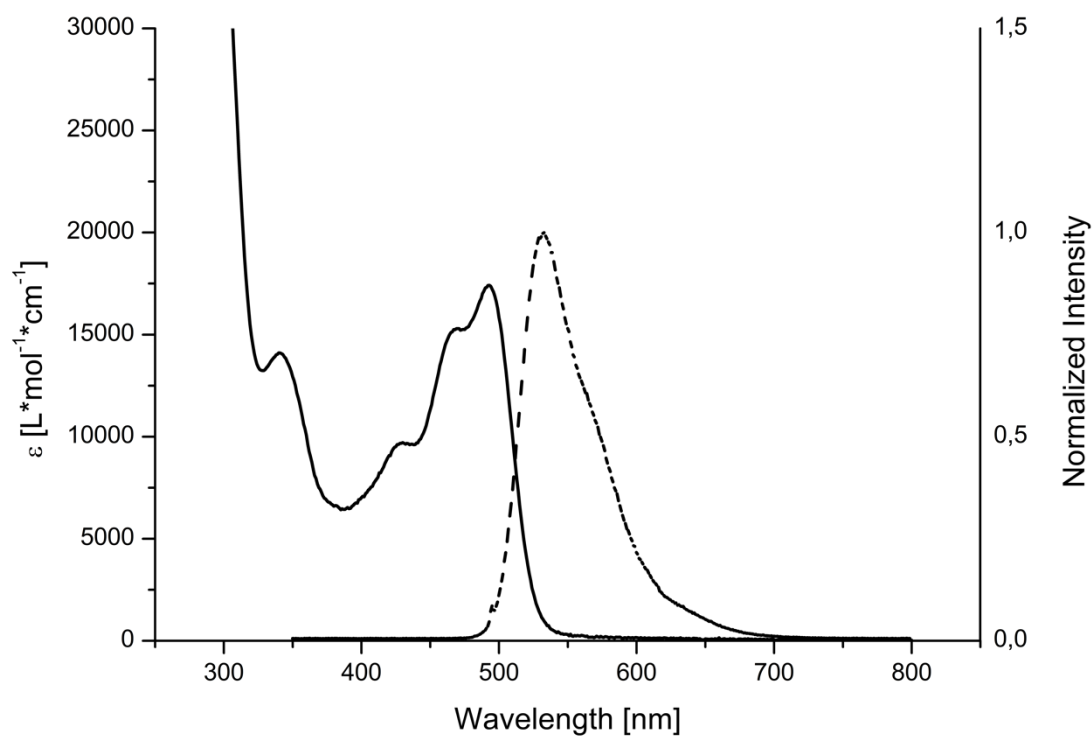

### 1,7-PTE-(PPB)<sub>2</sub> (6b)

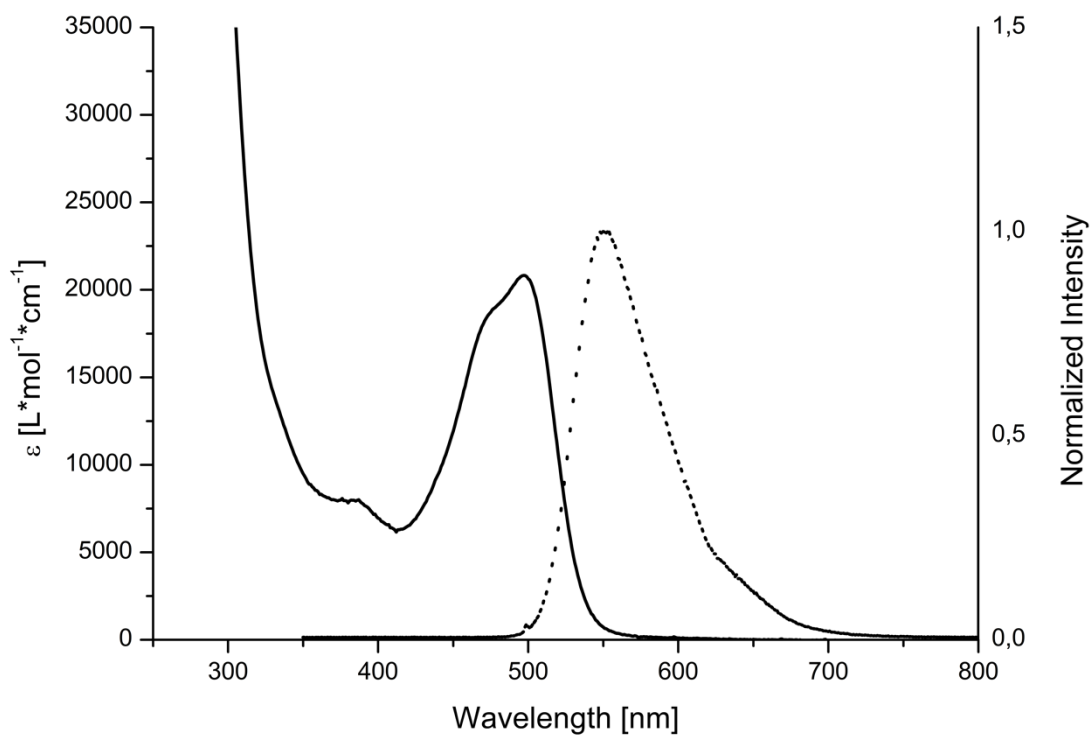

### 1,6-PDA-(PPB)<sub>2</sub> (8a)

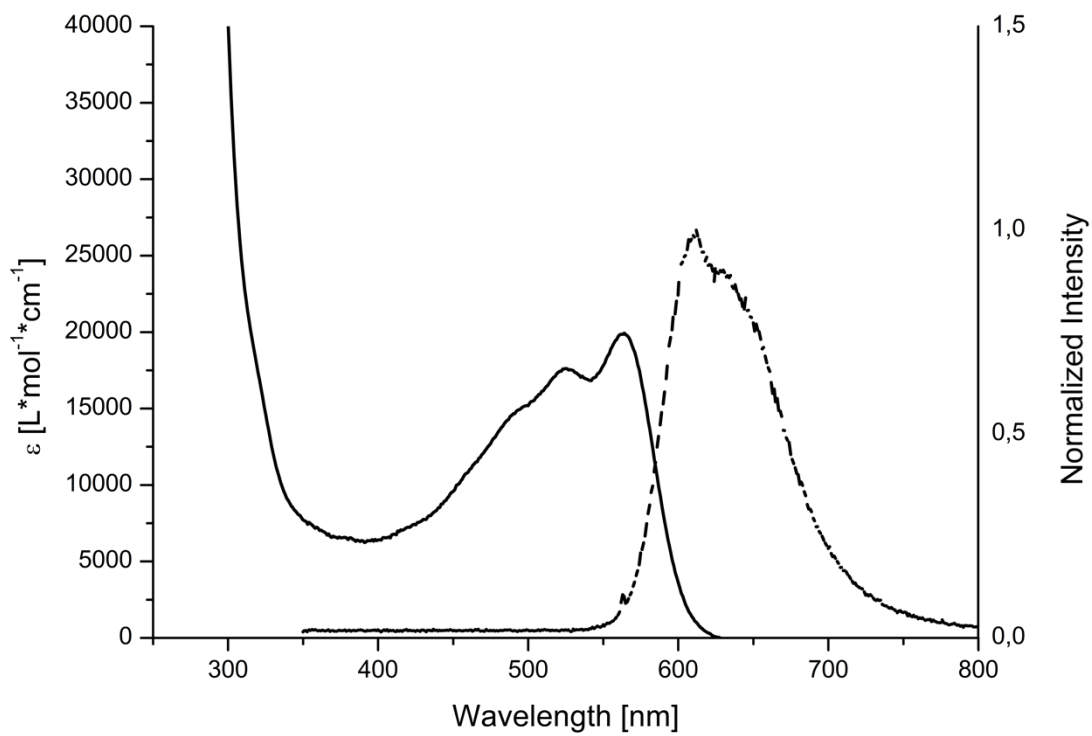

### 1,7-PDA-(PPB)<sub>2</sub> (8b)

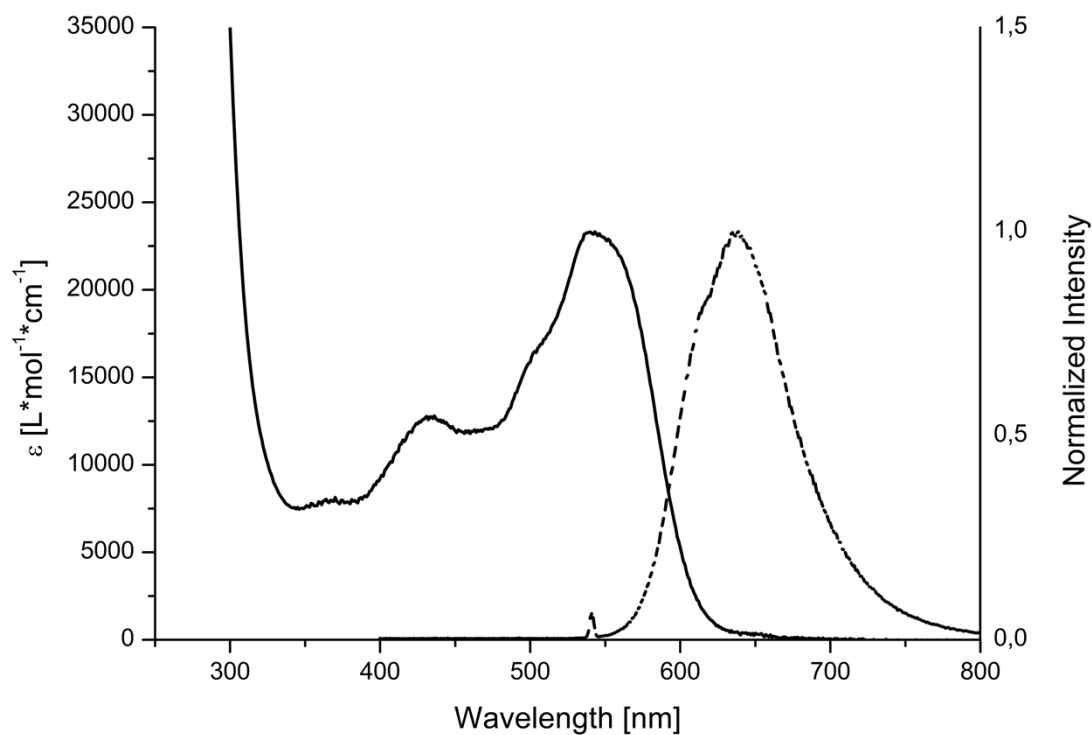

### 1,6-PDI-(PPB)<sub>2</sub> (7a)

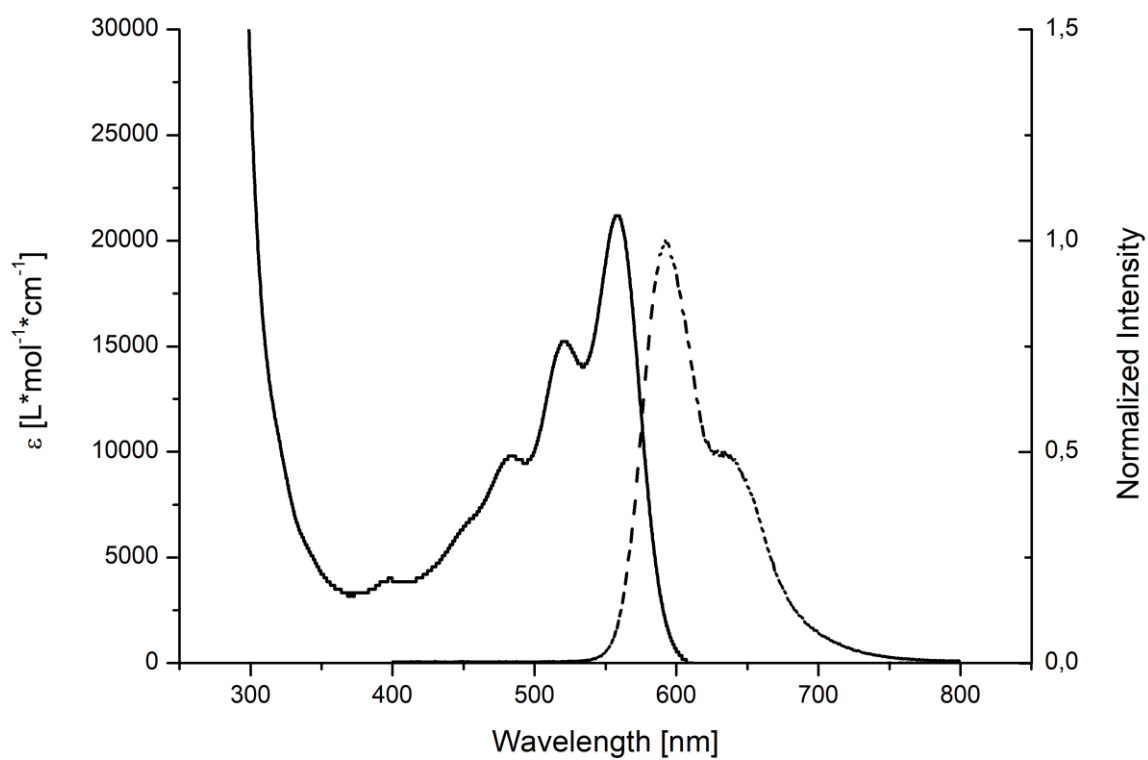

# 1,7-PDI-(PPB)<sub>2</sub> (7b)

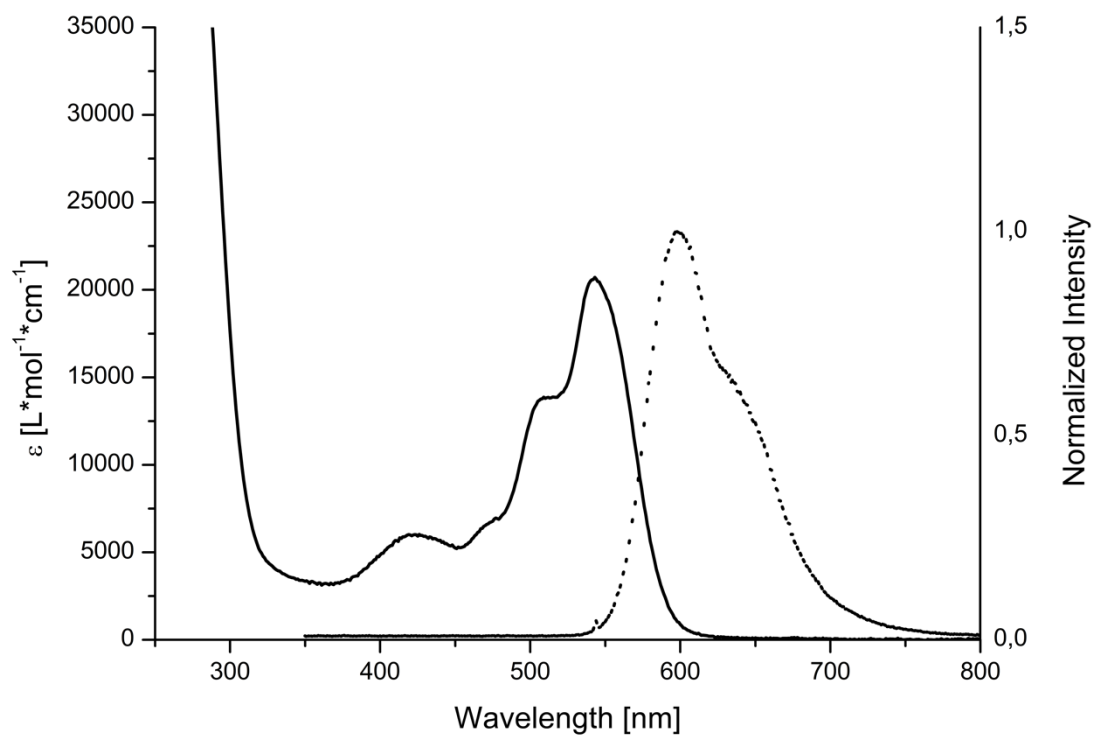

## S5. Crystal structure analysis

### 1.7-PTE-tolane **5b**

Crystal structure of 1.7-PTE-tolane **5b** depicted as ORTEP model with thermal ellipsoids drawn at a 50 % probability level:

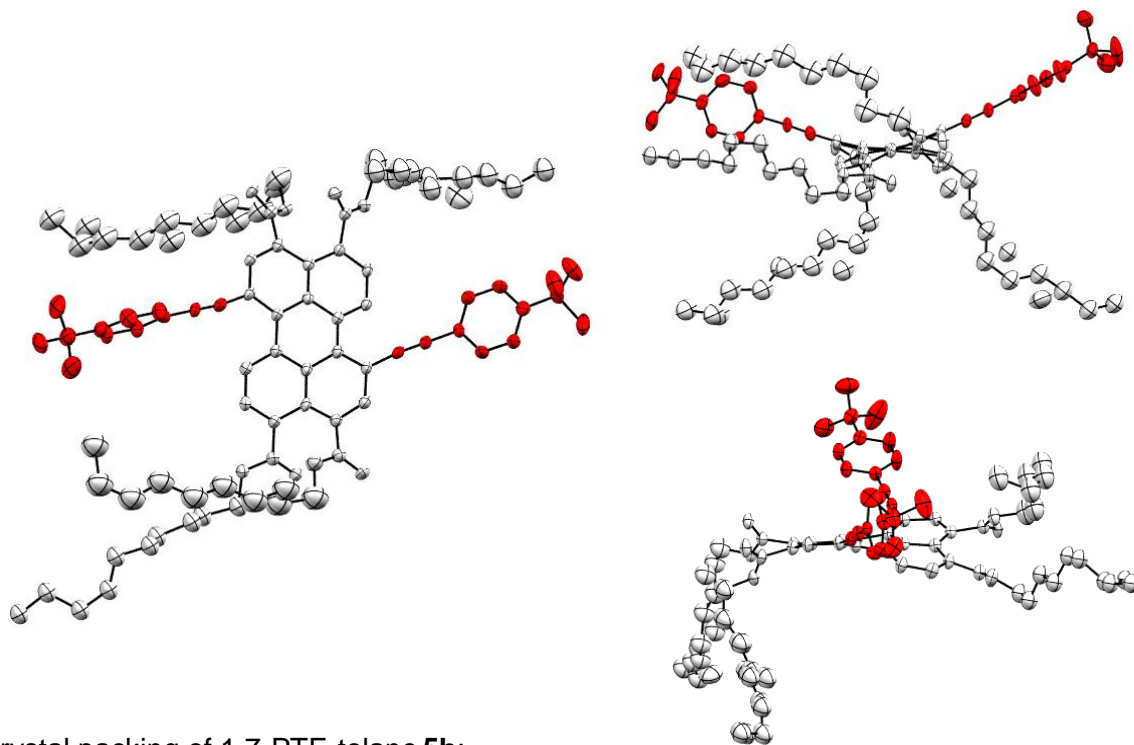

Crystal packing of 1.7-PTE-tolane **5b**:

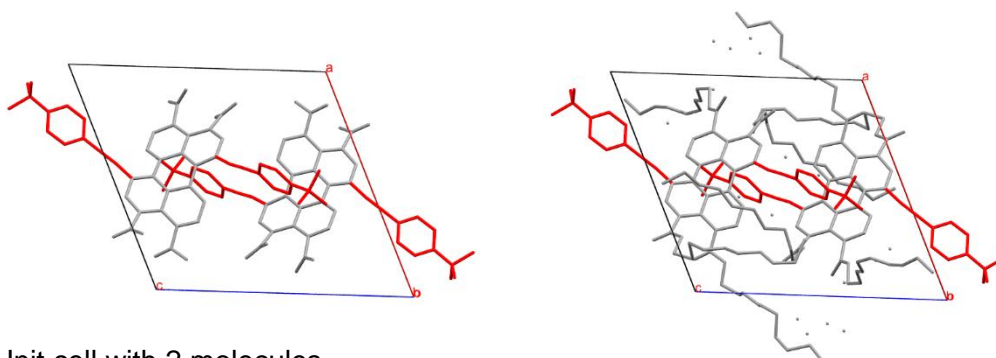

Unit cell with 2 molecules

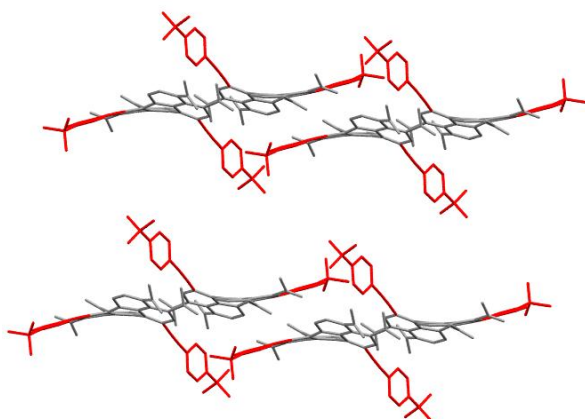



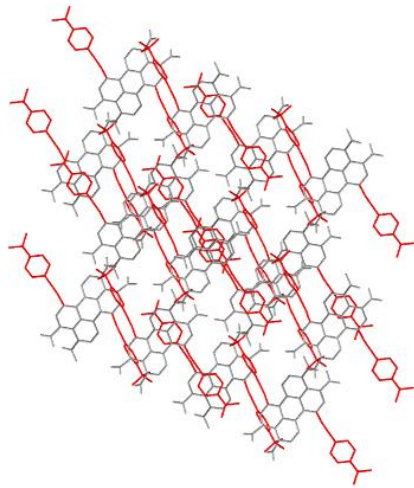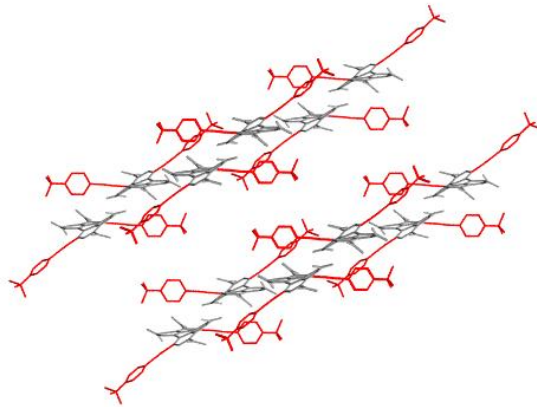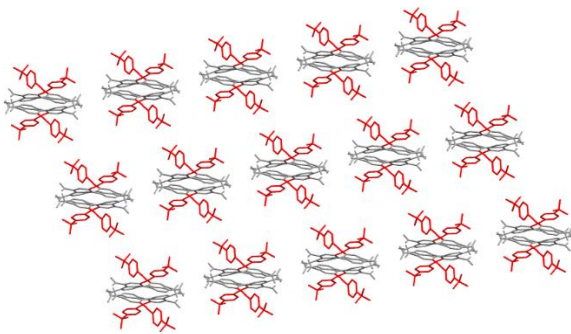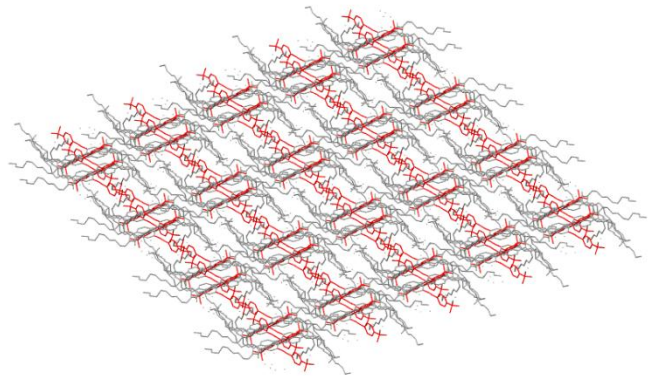

Crystal packing

## 1.6-PTE-(PPB)<sub>2</sub> 6a

Crystal structure of 1.6-PTE-(PPB)<sub>2</sub> **6a** depicted as ORTEP model with thermal ellipsoids drawn at a 50 % probability level:

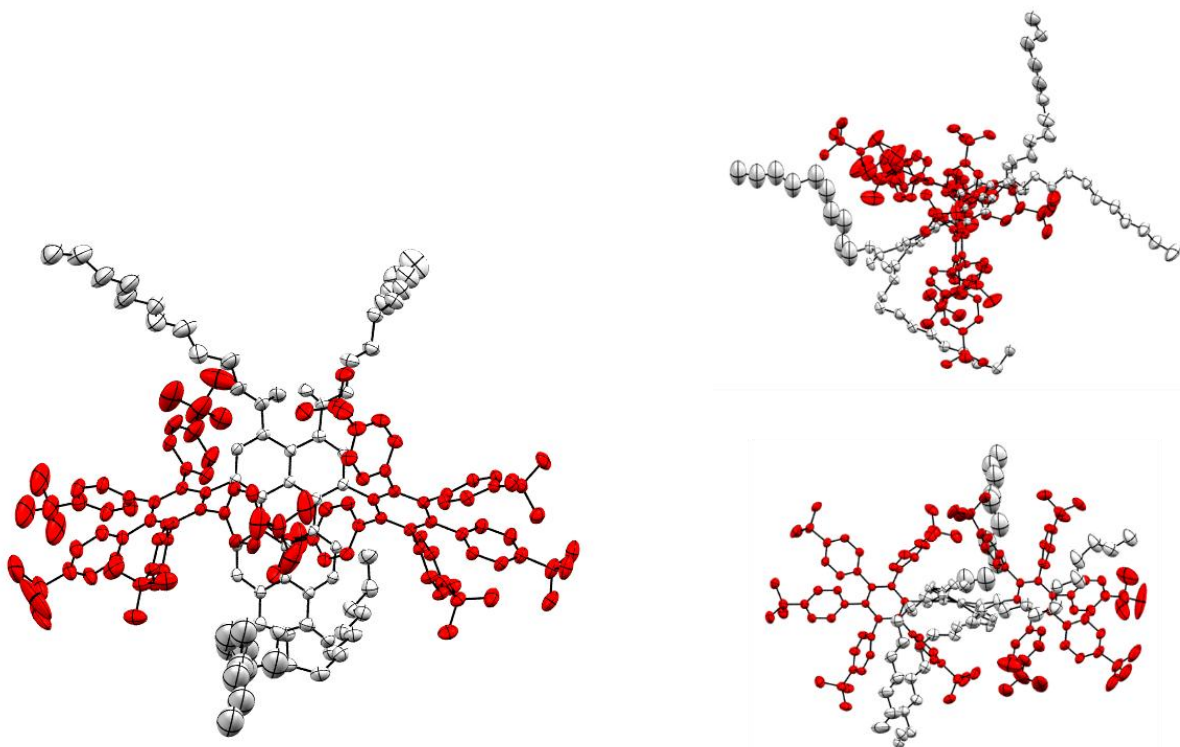

Crystal packing of 1.6-PTE-(PPB)<sub>2</sub> **6a**:

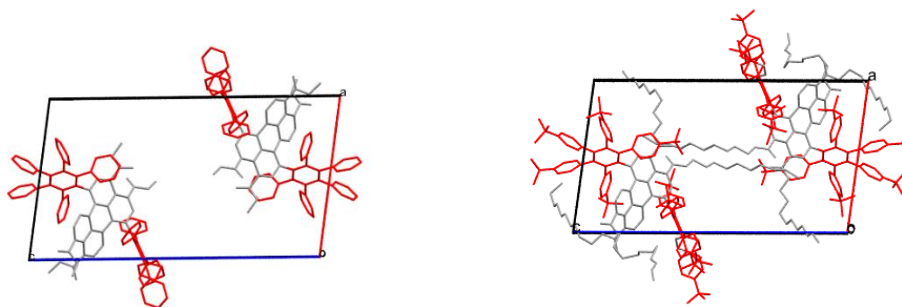

Unit cell with 2 molecules

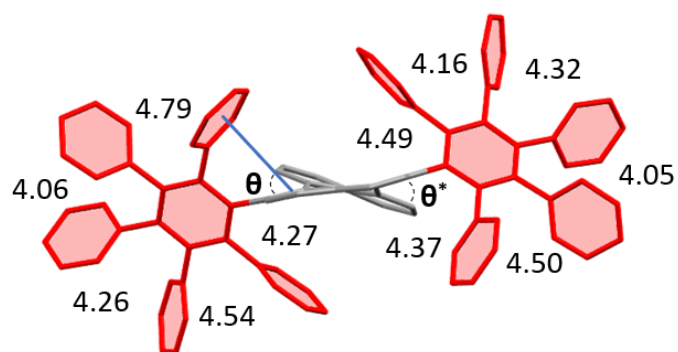

$\theta = 25.7$ ,  $\theta^* = 28.5$   
 $\pi$ - $\pi$  interaction, 3.9 Å

Centroid-centroid distances of phenyl units of PPB-substituents

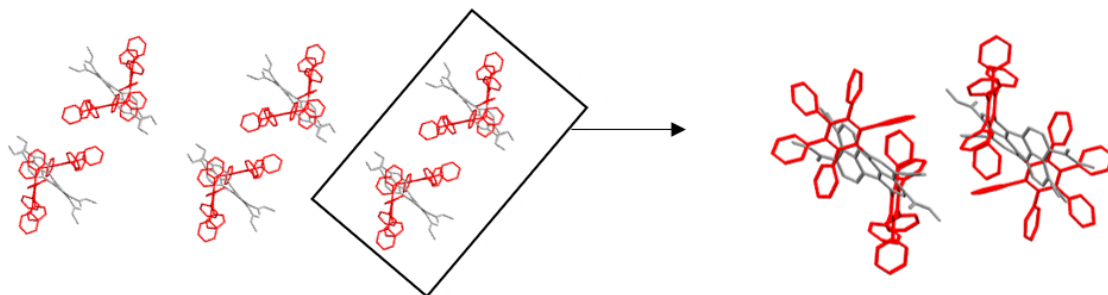

PPB-units facing each other

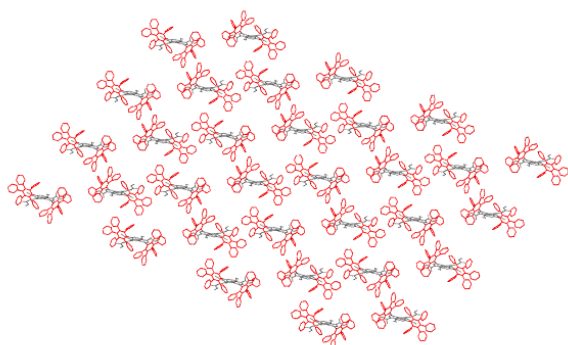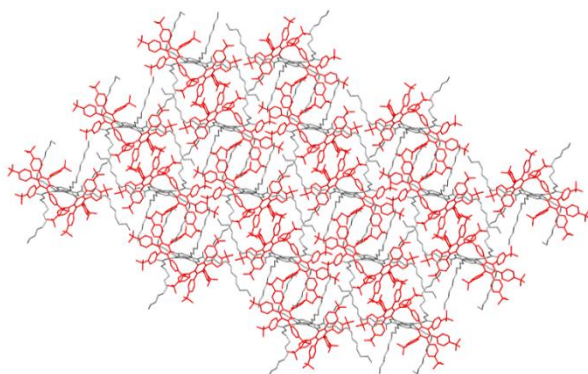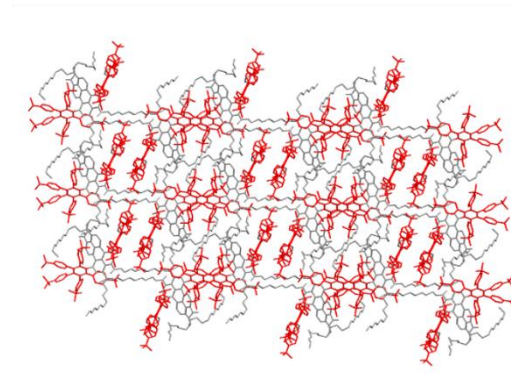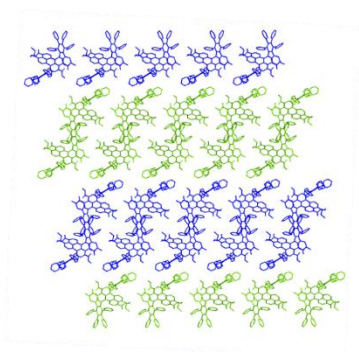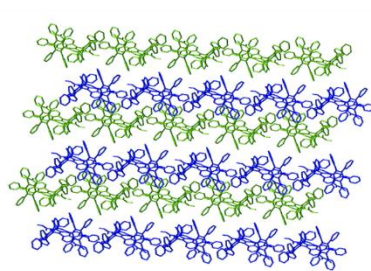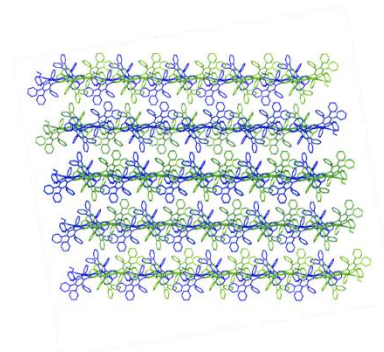

Crystal packing

Crystal data and structure refinement for 20Hir\_CW02\_2 (1.7-PTE-tolane 5b)

**Compound**            **20Hir\_CW02\_2**

|                                                |                                                 |
|------------------------------------------------|-------------------------------------------------|
| Formula                                        | C <sub>88</sub> H <sub>116</sub> O <sub>8</sub> |
| <i>D</i> <sub>calc.</sub> / g cm <sup>-3</sup> | 1.118                                           |
| <i>μ</i> /mm <sup>-1</sup>                     | 0.539                                           |
| Formula Weight                                 | 1301.80                                         |
| Colour                                         | clear yellowish<br>orange                       |
| Shape                                          | needle                                          |
| Size/mm <sup>3</sup>                           | 0.33×0.10×0.08                                  |
| <i>T</i> /K                                    | 113(14)                                         |
| Crystal System                                 | triclinic                                       |
| Space Group                                    | <i>P</i> -1                                     |
| <i>a</i> /Å                                    | 16.5010(4)                                      |
| <i>b</i> /Å                                    | 16.5277(4)                                      |
| <i>c</i> /Å                                    | 16.5470(3)                                      |
| <i>α</i> /°                                    | 84.401(2)                                       |
| <i>β</i> /°                                    | 66.537(2)                                       |
| <i>γ</i> /°                                    | 69.279(2)                                       |
| <i>V</i> /Å <sup>3</sup>                       | 3866.92(17)                                     |
| <i>Z</i>                                       | 2                                               |
| <i>Z</i> '                                     | 1                                               |
| Wavelength/Å                                   | 1.54184                                         |
| Radiation type                                 | Cu K <sub>α</sub>                               |
| <i>θ</i> <sub>min</sub> /°                     | 2.862                                           |
| <i>θ</i> <sub>max</sub> /°                     | 69.660                                          |
| Measured Refl's.                               | 69673                                           |
| Indep't Refl's                                 | 14290                                           |
| Refl's I≥2 <i>σ</i> (I)                        | 11376                                           |
| <i>R</i> <sub>int</sub>                        | 0.0505                                          |
| Parameters                                     | 700                                             |
| Restraints                                     | 162                                             |
| Largest Peak                                   | 2.964                                           |
| Deepest Hole                                   | -1.582                                          |
| Goof                                           | 2.789                                           |
| <i>wR</i> <sub>2</sub> (all data)              | 0.5795                                          |
| <i>wR</i> <sub>2</sub>                         | 0.5463                                          |
| <i>R</i> <sub>1</sub> (all data)               | 0.2198                                          |
| <i>R</i> <sub>1</sub>                          | 0.1977                                          |

**Experimental.** Single clear yellowish orange needle crystals of **20Hir\_CW02\_2** recrystallised from a mixture of toluene and methanol by solvent layering. A suitable crystal with dimensions 0.33 × 0.10 × 0.08 mm<sup>3</sup> was selected and mounted on a mylar loop on a SuperNova, Dual, Cu at home/near, Atlas diffractometer. The crystal was kept at a steady *T* = 113(14) K during data collection. The structure was solved with the ShelXT 2018/2 (Sheldrick, 2018) solution program using dual methods and by using Olex2 (Dolomanov et al., 2009) as the graphical interface. The model was refined with ShelXL 2018/3 (Sheldrick, 2015) using full matrix least squares minimisation on *F*<sup>2</sup>.

**Crystal Data.** C<sub>88</sub>H<sub>116</sub>O<sub>8</sub>, *M*<sub>r</sub> = 1301.80, triclinic, *P*-1 (No. 2), *a* = 16.5010(4) Å, *b* = 16.5277(4) Å, *c* = 16.5470(3) Å, *α* = 84.401(2)°, *β* = 66.537(2)°, *γ* = 69.279(2)°, *V* = 3866.92(17) Å<sup>3</sup>, *T* = 113(14) K, *Z* = 2, *Z*' = 1, *m*(Cu K<sub>α</sub>) = 0.539, 69673 reflections measured, 14290 unique (*R*<sub>int</sub> = 0.0505) which were used in all calculations. The final

$wR_2$  was 0.5795 (all data) and  $R_1$  was 0.1977 ( $I \geq 2 \sigma(I)$ ).

A clear yellowish orange needle-shaped crystal with dimensions  $0.33 \times 0.10 \times 0.08 \text{ mm}^3$  was mounted on a mylar loop. Data were collected using a SuperNova, Dual, Cu at home/near, Atlas diffractometer equipped with a Cryojet - Oxford Instruments low-temperature device operating at  $T = 113(14) \text{ K}$ .

Data were measured using  $\omega$  scans using Cu  $K_\alpha$  radiation. The diffraction pattern was indexed and the total number of runs and images was based on the strategy calculation from the program CrysAlisPro (Rigaku, V1.171.40.67a, 2019). The maximum resolution that was achieved was  $Q = 69.660^\circ$  ( $0.82 \text{ \AA}$ ).

The diffraction pattern was indexed and the total number of runs and images was based on the strategy calculation from the program CrysAlisPro (Rigaku, V1.171.40.67a, 2019). The unit cell was refined using CrysAlisPro (Rigaku, V1.171.40.67a, 2019) on 25917 reflections, 37% of the observed reflections.

Data reduction, scaling and absorption corrections were performed using CrysAlisPro (Rigaku, V1.171.40.67a, 2019). The final completeness is 99.80 % out to  $69.660^\circ$  in  $Q$ . A gaussian absorption correction was performed using CrysAlisPro 1.171.40.67a (Rigaku Oxford Diffraction, 2019) Numerical absorption correction based on gaussian integration over a multifaceted crystal model Empirical absorption correction using spherical harmonics, implemented in SCALE3 ABSPACK scaling algorithm.. The absorption coefficient  $m$  of this material is  $0.539 \text{ mm}^{-1}$  at this wavelength ( $\lambda = 1.54184 \text{ \AA}$ ) and the minimum and maximum transmissions are 0.698 and 1.000.

The structure was solved and the space group  $P-1$  (# 2) determined by the ShelXT 2018/2 (Sheldrick, 2018) structure solution program using using dual methods and refined by full matrix least squares minimisation on  $F^2$  using version 2018/3 of ShelXL 2018/3 (Sheldrick, 2015). All non-hydrogen atoms were refined anisotropically. Hydrogen atom positions were calculated geometrically and refined using the riding model. Hydrogen atom positions were calculated geometrically and refined using the riding model.

\_refine\_special\_details: The measured crystal was unfortunately no single crystal. The Ewald space pattern showed clearly a multiple twin. All attempts to index the single twin parts were unsuccessful because of too much overlap of the individual reflections. Nevertheless, the structure solution and refinement, the geometry, space group and resulting packing arrangements etc. are correct. Data were collected at 113 K, but strong disorder especially in the aliphatic chains is still existent and could only get partially resolved: C66-C69:C66a-C69a = 63:37%; C102:C10a = 79:21%, C104:C10b = 79:21%, C107:C10c = 46:54%; C87:C87a=37:63%; C90:C90a = 53:47% occupation. Further disorder along the aliphatic chains couldn't get resolved and resulted finally in a stronger and unassigned rest electron density.

\_exptl\_absorpt\_process\_details: CrysAlisPro 1.171.40.67a (Rigaku Oxford Diffraction, 2019) Numerical absorption correction based on gaussian integration over a multifaceted crystal model Empirical absorption correction using spherical harmonics implemented in SCALE3 ABSPACK.

There is a single molecule in the asymmetric unit, which is represented by the reported sum formula. In other words: Z is 2 and Z' is 1.

**Table 1:** Fractional Atomic Coordinates ( $\times 10^4$ ) and Equivalent Isotropic Displacement Parameters ( $\text{\AA}^2 \times 10^3$ ) for **20Hir\_CW02\_2**.  $U_{eq}$  is defined as 1/3 of the trace of the orthogonalised  $U_{ij}$ .

| Atom | x       | y        | z        | $U_{eq}$ |
|------|---------|----------|----------|----------|
| O57  | 8506(3) | 5220(3)  | 475(2)   | 41.0(9)  |
| O58  | 8603(2) | 5702(3)  | 1643(2)  | 38.3(9)  |
| O71  | 7686(3) | 6200(3)  | -872(2)  | 43.8(10) |
| O72  | 7498(3) | 6944(3)  | 297(3)   | 47.5(10) |
| O84  | 993(2)  | 5375(3)  | 4228(2)  | 38.6(9)  |
| O85  | 1550(2) | 4147(2)  | 3398(2)  | 34.2(8)  |
| O97  | 1545(3) | 5238(3)  | 5967(2)  | 43.1(10) |
| O98  | 2189(3) | 4108(3)  | 4978(2)  | 39.8(9)  |
| C11  | 6896(4) | 5563(4)  | 2680(3)  | 38.8(12) |
| C12  | 7127(3) | 5688(4)  | 1786(3)  | 32.6(11) |
| C13  | 6431(3) | 5837(3)  | 1414(3)  | 29.4(10) |
| C14  | 5567(3) | 5727(3)  | 1967(3)  | 28.2(10) |
| C15  | 5321(3) | 5658(3)  | 2898(3)  | 29.8(10) |
| C16  | 5989(4) | 5571(4)  | 3236(3)  | 37.6(12) |
| C17  | 6552(3) | 6085(3)  | 534(3)   | 30.4(10) |
| C18  | 5871(3) | 6153(3)  | 231(3)   | 31.7(10) |
| C19  | 5053(3) | 5946(3)  | 751(3)   | 28.4(10) |
| C21  | 4922(3) | 5689(3)  | 1612(3)  | 28.4(10) |
| C22  | 4170(3) | 5359(3)  | 2146(3)  | 27.5(10) |
| C23  | 3753(3) | 4988(3)  | 1771(3)  | 30.8(10) |
| C24  | 2964(3) | 4763(3)  | 2298(3)  | 30.4(10) |
| C25  | 2586(3) | 4894(3)  | 3203(3)  | 29.6(10) |
| C26  | 3042(3) | 5188(3)  | 3622(3)  | 30.2(10) |
| C27  | 3853(3) | 5395(3)  | 3087(3)  | 27.1(10) |
| C28  | 4377(3) | 5657(3)  | 3462(3)  | 30.1(10) |
| C29  | 3958(3) | 5879(3)  | 4374(3)  | 31.3(10) |
| C30  | 3151(3) | 5663(3)  | 4906(3)  | 31.5(10) |
| C31  | 2739(3) | 5279(3)  | 4559(3)  | 33.2(11) |
| C32  | 4401(3) | 6080(3)  | 346(3)   | 32.4(11) |
| C33  | 3911(4) | 6230(3)  | -60(3)   | 33.5(11) |
| C34  | 3307(4) | 6442(3)  | -549(3)  | 33.0(11) |
| C35  | 2440(4) | 6349(4)  | -212(3)  | 41.3(12) |
| C36  | 1871(4) | 6579(4)  | -687(4)  | 44.7(13) |
| C37  | 2158(4) | 6911(4)  | -1516(4) | 39.2(12) |
| C38  | 3034(4) | 6999(6)  | -1853(4) | 61(2)    |
| C39  | 3598(4) | 6762(5)  | -1374(4) | 56.8(19) |
| C40  | 1491(4) | 7224(4)  | -2003(4) | 45.2(13) |
| C41  | 2072(7) | 7189(11) | -3016(5) | 120(5)   |
| C42  | 928(7)  | 6628(6)  | -1901(8) | 83(3)    |
| C43  | 882(7)  | 8147(6)  | -1749(7) | 81(3)    |
| C44  | 4275(4) | 6324(4)  | 4815(3)  | 36.4(12) |
| C45  | 4423(4) | 6734(4)  | 5262(3)  | 35.3(11) |
| C46  | 4651(3) | 7176(3)  | 5807(3)  | 33.7(11) |
| C47  | 4241(4) | 8070(4)  | 5994(4)  | 46.8(14) |
| C48  | 4471(5) | 8458(4)  | 6536(5)  | 53.4(15) |
| C49  | 5106(4) | 7981(4)  | 6920(4)  | 42.9(13) |
| C50  | 5516(4) | 7097(4)  | 6702(4)  | 42.8(13) |
| C51  | 5299(4) | 6700(4)  | 6165(4)  | 39.9(12) |
| C52  | 5365(5) | 8423(5)  | 7500(4)  | 56.1(17) |
| C53  | 5933(9) | 8976(8)  | 6927(6)  | 97(4)    |
| C54  | 4461(7) | 9012(5)  | 8211(5)  | 71(2)    |
| C55  | 5937(6) | 7770(6)  | 7960(5)  | 69(2)    |

| Atom | x         | y        | z        | $U_{eq}$  |
|------|-----------|----------|----------|-----------|
| C56  | 8136(4)   | 5527(4)  | 1218(3)  | 37.0(12)  |
| C59  | 9636(5)   | 5389(6)  | 1157(5)  | 64.6(8)   |
| C61  | 10078(6)  | 5519(5)  | 1746(5)  | 64.6(8)   |
| C62  | 9980(6)   | 6440(5)  | 1882(5)  | 64.6(8)   |
| C63  | 10537(6)  | 6560(5)  | 2370(5)  | 64.6(8)   |
| C64  | 10493(6)  | 7486(5)  | 2383(5)  | 64.6(8)   |
| C65  | 10908(5)  | 7737(5)  | 2922(5)  | 64.6(8)   |
| C66  | 11974(7)  | 7258(8)  | 2520(8)  | 64.6(8)   |
| C67  | 12550(9)  | 7639(9)  | 2788(7)  | 64.6(8)   |
| C68  | 12289(9)  | 7726(9)  | 3766(7)  | 64.6(8)   |
| C69  | 12906(9)  | 8068(9)  | 3994(9)  | 64.6(8)   |
| C70  | 7325(4)   | 6380(4)  | -91(3)   | 35.7(11)  |
| C73  | 8275(10)  | 7227(10) | -272(9)  | 112.5(13) |
| C74  | 8502(10)  | 7697(9)  | 397(9)   | 112.5(13) |
| C75  | 7766(10)  | 8578(9)  | 503(9)   | 112.5(13) |
| C76  | 8054(10)  | 9193(10) | 972(9)   | 112.5(13) |
| C77  | 7947(10)  | 9036(9)  | 1844(9)  | 112.5(13) |
| C78  | 8166(10)  | 9757(10) | 2286(9)  | 112.5(13) |
| C79  | 8071(10)  | 9565(10) | 3227(9)  | 112.5(13) |
| C80  | 8560(10)  | 9919(10) | 3566(9)  | 112.5(13) |
| C81  | 8492(10)  | 9704(9)  | 4454(9)  | 112.5(13) |
| C82  | 7446(9)   | 9948(9)  | 5186(9)  | 112.5(13) |
| C83  | 1634(3)   | 4827(3)  | 3672(3)  | 31.5(10)  |
| C86  | 611(8)    | 4091(6)  | 3734(7)  | 85.6(10)  |
| C87  | 652(17)   | 3198(9)  | 3863(13) | 85.6(10)  |
| C88  | 1194(7)   | 2526(6)  | 3200(7)  | 85.6(10)  |
| C89  | 1184(8)   | 1761(6)  | 2960(7)  | 85.6(10)  |
| C90  | 1623(17)  | 869(8)   | 3028(14) | 85.6(10)  |
| C91  | 1821(8)   | 196(6)   | 2427(7)  | 85.6(10)  |
| C92  | 1548(19)  | 205(16)  | 1741(15) | 85.6(10)  |
| C93  | 1536(8)   | -429(7)  | 1269(7)  | 85.6(10)  |
| C94  | 1902(8)   | -1093(7) | 546(7)   | 85.6(10)  |
| C95  | 1272(8)   | -1124(7) | 169(7)   | 85.6(10)  |
| C96  | 2072(4)   | 4892(4)  | 5242(3)  | 36.9(12)  |
| C99  | 1601(9)   | 3658(7)  | 5602(7)  | 97.0(11)  |
| C100 | 2094(8)   | 2776(7)  | 5501(7)  | 97.0(11)  |
| C101 | 3010(8)   | 2282(7)  | 5440(7)  | 97.0(11)  |
| C102 | 3027(9)   | 2563(9)  | 6232(8)  | 97.0(11)  |
| C103 | 3871(8)   | 1942(7)  | 6377(6)  | 97.0(11)  |
| C104 | 3992(10)  | 2077(9)  | 7188(8)  | 97.0(11)  |
| C105 | 4759(8)   | 1575(7)  | 7443(6)  | 97.0(11)  |
| C106 | 4938(9)   | 1744(7)  | 8204(6)  | 97.0(11)  |
| C107 | 5010(30)  | 1001(14) | 8740(15) | 97.0(11)  |
| C108 | 4940(9)   | 1289(7)  | 9620(7)  | 97.0(11)  |
| C66A | 11098(14) | 7348(14) | 3682(12) | 64.6(8)   |
| C67A | 11763(13) | 7679(15) | 3838(11) | 64.6(8)   |
| C68A | 11265(14) | 7818(15) | 4811(10) | 64.6(8)   |
| C69A | 11576(15) | 8187(14) | 5364(13) | 64.6(8)   |
| C87A | 659(12)   | 3409(7)  | 3214(12) | 85.6(10)  |
| C90A | 1728(12)  | 1096(8)  | 2253(10) | 85.6(10)  |
| C92A | 2277(14)  | -470(13) | 1515(16) | 107(6)    |
| C10A | 3660(30)  | 1624(17) | 5730(30) | 97.0(11)  |
| C10B | 4440(40)  | 2090(30) | 6780(30) | 97.0(11)  |
| C10C | 5480(18)  | 1137(14) | 8580(13) | 97.0(11)  |

**Table 2:** Anisotropic Displacement Parameters ( $\times 10^4$ ) for **20Hir\_CW02\_2**. The anisotropic displacement factor exponent takes the form:  $-2\pi^2[h^2a^{*2} \times U_{11} + \dots + 2hka^* \times b^* \times U_{12}]$

| Atom | $U_{11}$ | $U_{22}$ | $U_{33}$ | $U_{23}$ | $U_{13}$ | $U_{12}$  |
|------|----------|----------|----------|----------|----------|-----------|
| O57  | 36.2(19) | 61(2)    | 24.4(18) | -9.4(16) | -4.8(14) | -20.9(17) |

| Atom | $U_{11}$ | $U_{22}$ | $U_{33}$ | $U_{23}$ | $U_{13}$  | $U_{12}$  |
|------|----------|----------|----------|----------|-----------|-----------|
| O58  | 31.6(17) | 57(2)    | 29.7(18) | -7.5(16) | -9.9(14)  | -18.2(16) |
| O71  | 43(2)    | 73(3)    | 22.6(17) | 8.3(17)  | -8.7(15)  | -34.1(19) |
| O72  | 51(2)    | 56(2)    | 41(2)    | -1.5(18) | -9.7(17)  | -34(2)    |
| O84  | 33.8(18) | 48(2)    | 30.5(18) | -5.4(16) | -3.3(15)  | -19.3(16) |
| O85  | 32.9(17) | 46(2)    | 27.2(17) | -1.5(15) | -9.6(14)  | -19.5(15) |
| O97  | 45(2)    | 69(3)    | 16.1(16) | -3.3(16) | -2.0(15)  | -31.2(19) |
| O98  | 41(2)    | 50(2)    | 26.0(17) | 6.2(15)  | -7.0(15)  | -21.3(17) |
| C11  | 37(3)    | 59(3)    | 24(2)    | -1(2)    | -15(2)    | -18(2)    |
| C12  | 31(2)    | 47(3)    | 22(2)    | -4(2)    | -6.4(18)  | -18(2)    |
| C13  | 36(2)    | 36(2)    | 18(2)    | -6.1(18) | -8.8(18)  | -14.5(19) |
| C14  | 32(2)    | 33(2)    | 21(2)    | -3.2(18) | -8.4(18)  | -13.2(19) |
| C15  | 31(2)    | 37(3)    | 23(2)    | -2.6(19) | -9.0(18)  | -15.1(19) |
| C16  | 33(2)    | 57(3)    | 23(2)    | -3(2)    | -9(2)     | -17(2)    |
| C17  | 31(2)    | 36(3)    | 25(2)    | -3.6(19) | -7.5(18)  | -16.2(19) |
| C18  | 36(2)    | 39(3)    | 21(2)    | -0.9(19) | -7.9(19)  | -17(2)    |
| C19  | 32(2)    | 37(2)    | 18(2)    | -1.7(18) | -8.6(17)  | -15.2(19) |
| C21  | 32(2)    | 33(2)    | 21(2)    | -4.2(18) | -7.8(18)  | -13.9(19) |
| C22  | 29(2)    | 33(2)    | 19(2)    | -1.2(17) | -7.9(17)  | -10.6(18) |
| C23  | 37(2)    | 40(3)    | 18(2)    | -1.7(18) | -8.9(18)  | -17(2)    |
| C24  | 37(2)    | 39(3)    | 19(2)    | -4.0(18) | -9.6(18)  | -18(2)    |
| C25  | 35(2)    | 36(2)    | 21(2)    | 2.0(18)  | -9.4(18)  | -18.5(19) |
| C26  | 33(2)    | 35(2)    | 21(2)    | -1.5(18) | -8.8(18)  | -12.2(19) |
| C27  | 31(2)    | 30(2)    | 22(2)    | -0.3(17) | -10.3(18) | -12.8(18) |
| C28  | 33(2)    | 41(3)    | 19(2)    | 1.9(18)  | -9.3(18)  | -16(2)    |
| C29  | 36(2)    | 41(3)    | 16(2)    | 1.0(18)  | -6.4(18)  | -17(2)    |
| C30  | 34(2)    | 44(3)    | 17(2)    | 0.1(19)  | -6.2(18)  | -18(2)    |
| C31  | 34(2)    | 44(3)    | 23(2)    | -4(2)    | -7.9(19)  | -16(2)    |
| C32  | 35(2)    | 42(3)    | 19(2)    | 0.2(19)  | -5.5(19)  | -18(2)    |
| C33  | 38(3)    | 46(3)    | 24(2)    | 3(2)     | -13(2)    | -21(2)    |
| C34  | 37(2)    | 44(3)    | 27(2)    | 0(2)     | -16(2)    | -19(2)    |
| C35  | 41(3)    | 60(3)    | 28(2)    | 2(2)     | -11(2)    | -25(3)    |
| C36  | 37(3)    | 65(4)    | 37(3)    | 2(3)     | -10(2)    | -28(3)    |
| C37  | 39(3)    | 45(3)    | 35(3)    | -6(2)    | -12(2)    | -16(2)    |
| C38  | 43(3)    | 120(6)   | 33(3)    | 22(3)    | -21(3)    | -40(4)    |
| C39  | 43(3)    | 110(6)   | 35(3)    | 28(3)    | -21(3)    | -47(4)    |
| C40  | 42(3)    | 57(3)    | 46(3)    | -7(3)    | -23(2)    | -20(3)    |
| C41  | 66(5)    | 244(16)  | 45(4)    | -20(6)   | -31(4)    | -30(7)    |
| C42  | 73(5)    | 86(6)    | 124(8)   | 11(5)    | -68(5)    | -34(4)    |
| C43  | 92(6)    | 67(5)    | 111(7)   | -2(5)    | -75(6)    | -13(4)    |
| C44  | 37(3)    | 50(3)    | 22(2)    | 4(2)     | -9.2(19)  | -18(2)    |
| C45  | 42(3)    | 48(3)    | 21(2)    | 1(2)     | -14(2)    | -20(2)    |
| C46  | 34(2)    | 43(3)    | 28(2)    | 0(2)     | -10.0(19) | -21(2)    |
| C47  | 53(3)    | 40(3)    | 50(3)    | -2(3)    | -26(3)    | -11(2)    |
| C48  | 58(4)    | 38(3)    | 66(4)    | -7(3)    | -26(3)    | -14(3)    |
| C49  | 53(3)    | 49(3)    | 33(3)    | -4(2)    | -13(2)    | -26(3)    |
| C50  | 55(3)    | 45(3)    | 40(3)    | 2(2)     | -27(3)    | -21(3)    |
| C51  | 51(3)    | 37(3)    | 40(3)    | -2(2)    | -24(2)    | -16(2)    |
| C52  | 73(4)    | 64(4)    | 45(3)    | -14(3)   | -16(3)    | -43(4)    |
| C53  | 136(9)   | 137(9)   | 60(5)    | -13(5)   | -24(5)    | -107(8)   |
| C54  | 99(6)    | 67(5)    | 53(4)    | -26(4)   | -29(4)    | -28(4)    |
| C55  | 65(4)    | 92(6)    | 68(4)    | -24(4)   | -34(4)    | -30(4)    |
| C56  | 35(3)    | 51(3)    | 29(3)    | -1(2)    | -12(2)    | -20(2)    |
| C59  | 63.7(16) | 73.6(18) | 66.2(17) | 0.4(13)  | -29.4(13) | -29.1(13) |
| C61  | 63.7(16) | 73.6(18) | 66.2(17) | 0.4(13)  | -29.4(13) | -29.1(13) |
| C62  | 63.7(16) | 73.6(18) | 66.2(17) | 0.4(13)  | -29.4(13) | -29.1(13) |
| C63  | 63.7(16) | 73.6(18) | 66.2(17) | 0.4(13)  | -29.4(13) | -29.1(13) |
| C64  | 63.7(16) | 73.6(18) | 66.2(17) | 0.4(13)  | -29.4(13) | -29.1(13) |
| C65  | 63.7(16) | 73.6(18) | 66.2(17) | 0.4(13)  | -29.4(13) | -29.1(13) |
| C66  | 63.7(16) | 73.6(18) | 66.2(17) | 0.4(13)  | -29.4(13) | -29.1(13) |
| C67  | 63.7(16) | 73.6(18) | 66.2(17) | 0.4(13)  | -29.4(13) | -29.1(13) |
| C68  | 63.7(16) | 73.6(18) | 66.2(17) | 0.4(13)  | -29.4(13) | -29.1(13) |



| Atom | $U_{11}$ | $U_{22}$ | $U_{33}$ | $U_{23}$ | $U_{13}$  | $U_{12}$  |
|------|----------|----------|----------|----------|-----------|-----------|
| C69  | 63.7(16) | 73.6(18) | 66.2(17) | 0.4(13)  | -29.4(13) | -29.1(13) |
| C70  | 36(3)    | 41(3)    | 31(3)    | 2(2)     | -11(2)    | -18(2)    |
| C73  | 114(3)   | 122(3)   | 110(3)   | 10(2)    | -31(2)    | -66(3)    |
| C74  | 114(3)   | 122(3)   | 110(3)   | 10(2)    | -31(2)    | -66(3)    |
| C75  | 114(3)   | 122(3)   | 110(3)   | 10(2)    | -31(2)    | -66(3)    |
| C76  | 114(3)   | 122(3)   | 110(3)   | 10(2)    | -31(2)    | -66(3)    |
| C77  | 114(3)   | 122(3)   | 110(3)   | 10(2)    | -31(2)    | -66(3)    |
| C78  | 114(3)   | 122(3)   | 110(3)   | 10(2)    | -31(2)    | -66(3)    |
| C79  | 114(3)   | 122(3)   | 110(3)   | 10(2)    | -31(2)    | -66(3)    |
| C80  | 114(3)   | 122(3)   | 110(3)   | 10(2)    | -31(2)    | -66(3)    |
| C81  | 114(3)   | 122(3)   | 110(3)   | 10(2)    | -31(2)    | -66(3)    |
| C82  | 114(3)   | 122(3)   | 110(3)   | 10(2)    | -31(2)    | -66(3)    |
| C83  | 34(2)    | 40(3)    | 19(2)    | -0.3(19) | -7.4(19)  | -14(2)    |
| C86  | 95(2)    | 80(2)    | 91(2)    | -4.8(17) | -38.3(19) | -36.5(18) |
| C87  | 95(2)    | 80(2)    | 91(2)    | -4.8(17) | -38.3(19) | -36.5(18) |
| C88  | 95(2)    | 80(2)    | 91(2)    | -4.8(17) | -38.3(19) | -36.5(18) |
| C89  | 95(2)    | 80(2)    | 91(2)    | -4.8(17) | -38.3(19) | -36.5(18) |
| C90  | 95(2)    | 80(2)    | 91(2)    | -4.8(17) | -38.3(19) | -36.5(18) |
| C91  | 95(2)    | 80(2)    | 91(2)    | -4.8(17) | -38.3(19) | -36.5(18) |
| C92  | 95(2)    | 80(2)    | 91(2)    | -4.8(17) | -38.3(19) | -36.5(18) |
| C93  | 95(2)    | 80(2)    | 91(2)    | -4.8(17) | -38.3(19) | -36.5(18) |
| C94  | 95(2)    | 80(2)    | 91(2)    | -4.8(17) | -38.3(19) | -36.5(18) |
| C95  | 95(2)    | 80(2)    | 91(2)    | -4.8(17) | -38.3(19) | -36.5(18) |
| C96  | 34(2)    | 54(3)    | 24(2)    | 0(2)     | -8(2)     | -19(2)    |
| C99  | 108(3)   | 91(2)    | 75(2)    | 7.8(18)  | -16.7(19) | -38(2)    |
| C100 | 108(3)   | 91(2)    | 75(2)    | 7.8(18)  | -16.7(19) | -38(2)    |
| C101 | 108(3)   | 91(2)    | 75(2)    | 7.8(18)  | -16.7(19) | -38(2)    |
| C102 | 108(3)   | 91(2)    | 75(2)    | 7.8(18)  | -16.7(19) | -38(2)    |
| C103 | 108(3)   | 91(2)    | 75(2)    | 7.8(18)  | -16.7(19) | -38(2)    |
| C104 | 108(3)   | 91(2)    | 75(2)    | 7.8(18)  | -16.7(19) | -38(2)    |
| C105 | 108(3)   | 91(2)    | 75(2)    | 7.8(18)  | -16.7(19) | -38(2)    |
| C106 | 108(3)   | 91(2)    | 75(2)    | 7.8(18)  | -16.7(19) | -38(2)    |
| C107 | 108(3)   | 91(2)    | 75(2)    | 7.8(18)  | -16.7(19) | -38(2)    |
| C108 | 108(3)   | 91(2)    | 75(2)    | 7.8(18)  | -16.7(19) | -38(2)    |
| C66A | 63.7(16) | 73.6(18) | 66.2(17) | 0.4(13)  | -29.4(13) | -29.1(13) |
| C67A | 63.7(16) | 73.6(18) | 66.2(17) | 0.4(13)  | -29.4(13) | -29.1(13) |
| C68A | 63.7(16) | 73.6(18) | 66.2(17) | 0.4(13)  | -29.4(13) | -29.1(13) |
| C69A | 63.7(16) | 73.6(18) | 66.2(17) | 0.4(13)  | -29.4(13) | -29.1(13) |
| C87A | 95(2)    | 80(2)    | 91(2)    | -4.8(17) | -38.3(19) | -36.5(18) |
| C90A | 95(2)    | 80(2)    | 91(2)    | -4.8(17) | -38.3(19) | -36.5(18) |
| C92A | 101(14)  | 73(11)   | 132(17)  | -20(11)  | -41(12)   | -13(9)    |
| C10A | 108(3)   | 91(2)    | 75(2)    | 7.8(18)  | -16.7(19) | -38(2)    |
| C10B | 108(3)   | 91(2)    | 75(2)    | 7.8(18)  | -16.7(19) | -38(2)    |
| C10C | 108(3)   | 91(2)    | 75(2)    | 7.8(18)  | -16.7(19) | -38(2)    |

**Table 3:** Bond Lengths in Å for 20Hir\_CW02\_2.

| Atom | Atom | Length/Å  | Atom | Atom | Length/Å |
|------|------|-----------|------|------|----------|
| O57  | C56  | 1.203(6)  | C11  | C12  | 1.388(7) |
| O58  | C56  | 1.343(6)  | C11  | C16  | 1.406(7) |
| O58  | C59  | 1.478(9)  | C12  | C13  | 1.445(7) |
| O71  | C70  | 1.205(6)  | C12  | C56  | 1.488(7) |
| O72  | C70  | 1.347(7)  | C13  | C14  | 1.419(7) |
| O72  | C73  | 1.458(12) | C13  | C17  | 1.428(6) |
| O84  | C83  | 1.223(6)  | C14  | C15  | 1.433(6) |
| O85  | C83  | 1.322(6)  | C14  | C21  | 1.427(6) |
| O85  | C86  | 1.458(11) | C15  | C16  | 1.383(7) |
| O97  | C96  | 1.214(6)  | C15  | C28  | 1.463(7) |
| O98  | C96  | 1.331(7)  | C17  | C18  | 1.367(7) |
| O98  | C99  | 1.457(11) | C17  | C70  | 1.492(7) |

| Atom | Atom | Length/Å  | Atom | Atom | Length/Å  |
|------|------|-----------|------|------|-----------|
| C18  | C19  | 1.424(7)  | C65  | C66A | 1.452(13) |
| C19  | C21  | 1.399(6)  | C66  | C67  | 1.518(11) |
| C19  | C32  | 1.425(7)  | C67  | C68  | 1.508(11) |
| C21  | C22  | 1.460(6)  | C68  | C69  | 1.502(11) |
| C22  | C23  | 1.396(7)  | C73  | C74  | 1.636(19) |
| C22  | C27  | 1.431(6)  | C74  | C75  | 1.50(2)   |
| C23  | C24  | 1.403(7)  | C75  | C76  | 1.630(18) |
| C24  | C25  | 1.379(6)  | C76  | C77  | 1.392(18) |
| C25  | C26  | 1.421(7)  | C77  | C78  | 1.665(17) |
| C25  | C83  | 1.488(7)  | C78  | C79  | 1.515(18) |
| C26  | C27  | 1.419(7)  | C79  | C80  | 1.437(17) |
| C26  | C31  | 1.432(7)  | C80  | C81  | 1.446(18) |
| C27  | C28  | 1.437(7)  | C81  | C82  | 1.596(18) |
| C28  | C29  | 1.410(6)  | C86  | C87  | 1.451(14) |
| C29  | C30  | 1.421(7)  | C86  | C87A | 1.446(12) |
| C29  | C44  | 1.425(7)  | C87  | C88  | 1.411(14) |
| C30  | C31  | 1.372(7)  | C88  | C89  | 1.369(13) |
| C31  | C96  | 1.505(7)  | C88  | C87A | 1.410(13) |
| C32  | C33  | 1.194(7)  | C89  | C90  | 1.411(14) |
| C33  | C34  | 1.452(6)  | C89  | C90A | 1.449(13) |
| C34  | C35  | 1.373(7)  | C90  | C91  | 1.426(14) |
| C34  | C39  | 1.375(7)  | C91  | C92  | 1.38(2)   |
| C35  | C36  | 1.385(8)  | C91  | C90A | 1.453(13) |
| C36  | C37  | 1.387(8)  | C91  | C92A | 1.70(2)   |
| C37  | C38  | 1.384(8)  | C92  | C93  | 1.38(2)   |
| C37  | C40  | 1.534(7)  | C93  | C94  | 1.487(14) |
| C38  | C39  | 1.384(8)  | C93  | C92A | 1.413(19) |
| C40  | C41  | 1.560(11) | C94  | C95  | 1.426(14) |
| C40  | C42  | 1.532(10) | C99  | C100 | 1.384(15) |
| C40  | C43  | 1.489(11) | C100 | C101 | 1.409(11) |
| C44  | C45  | 1.193(8)  | C101 | C102 | 1.446(12) |
| C45  | C46  | 1.443(7)  | C101 | C10A | 1.433(15) |
| C46  | C47  | 1.398(8)  | C102 | C103 | 1.502(12) |
| C46  | C51  | 1.389(8)  | C103 | C104 | 1.481(12) |
| C47  | C48  | 1.382(9)  | C103 | C10A | 1.440(15) |
| C48  | C49  | 1.406(9)  | C103 | C10B | 1.445(15) |
| C49  | C50  | 1.389(9)  | C104 | C105 | 1.442(12) |
| C49  | C52  | 1.524(8)  | C105 | C106 | 1.474(11) |
| C50  | C51  | 1.373(8)  | C105 | C10B | 1.471(15) |
| C52  | C53  | 1.531(11) | C106 | C107 | 1.442(14) |
| C52  | C54  | 1.535(11) | C106 | C10C | 1.37(2)   |
| C52  | C55  | 1.524(12) | C107 | C108 | 1.53(3)   |
| C59  | C61  | 1.499(9)  | C108 | C10C | 1.59(2)   |
| C61  | C62  | 1.503(9)  | C66A | C67A | 1.500(14) |
| C62  | C63  | 1.514(8)  | C67A | C68A | 1.485(14) |
| C63  | C64  | 1.508(9)  | C68A | C69A | 1.476(13) |
| C64  | C65  | 1.482(8)  |      |      |           |
| C65  | C66  | 1.532(11) |      |      |           |

**Table 4:** Bond Angles in ° for **20Hir\_CW02\_2**.

| Atom | Atom | Atom | Angle/°  | Atom | Atom | Atom | Angle/°  |
|------|------|------|----------|------|------|------|----------|
| C56  | O58  | C59  | 113.9(4) | C14  | C13  | C12  | 117.4(4) |
| C70  | O72  | C73  | 115.0(6) | C14  | C13  | C17  | 117.9(4) |
| C83  | O85  | C86  | 117.1(5) | C17  | C13  | C12  | 124.7(4) |
| C96  | O98  | C99  | 116.6(6) | C13  | C14  | C15  | 120.5(4) |
| C12  | C11  | C16  | 120.8(4) | C13  | C14  | C21  | 121.0(4) |
| C11  | C12  | C13  | 120.2(4) | C21  | C14  | C15  | 118.5(4) |
| C11  | C12  | C56  | 117.4(4) | C14  | C15  | C28  | 119.0(4) |
| C13  | C12  | C56  | 121.7(4) | C16  | C15  | C14  | 119.1(4) |

| Atom | Atom | Atom | Angle/°  | Atom | Atom | Atom | Angle/°   |
|------|------|------|----------|------|------|------|-----------|
| C16  | C15  | C28  | 121.9(4) | C48  | C49  | C52  | 121.3(6)  |
| C15  | C16  | C11  | 120.8(4) | C50  | C49  | C48  | 116.1(5)  |
| C13  | C17  | C70  | 125.8(4) | C50  | C49  | C52  | 122.4(6)  |
| C18  | C17  | C13  | 119.8(4) | C51  | C50  | C49  | 122.5(5)  |
| C18  | C17  | C70  | 114.1(4) | C50  | C51  | C46  | 120.7(5)  |
| C17  | C18  | C19  | 122.3(4) | C49  | C52  | C53  | 108.8(5)  |
| C18  | C19  | C32  | 115.0(4) | C49  | C52  | C54  | 109.3(6)  |
| C21  | C19  | C18  | 119.1(4) | C53  | C52  | C54  | 109.0(7)  |
| C21  | C19  | C32  | 125.7(4) | C55  | C52  | C49  | 111.9(6)  |
| C14  | C21  | C22  | 119.1(4) | C55  | C52  | C53  | 109.6(8)  |
| C19  | C21  | C14  | 118.5(4) | C55  | C52  | C54  | 108.2(6)  |
| C19  | C21  | C22  | 122.4(4) | O57  | C56  | O58  | 123.5(5)  |
| C23  | C22  | C21  | 122.3(4) | O57  | C56  | C12  | 123.4(5)  |
| C23  | C22  | C27  | 118.0(4) | O58  | C56  | C12  | 112.9(4)  |
| C27  | C22  | C21  | 119.7(4) | O58  | C59  | C61  | 108.5(6)  |
| C22  | C23  | C24  | 120.9(4) | C59  | C61  | C62  | 115.3(7)  |
| C25  | C24  | C23  | 120.9(4) | C61  | C62  | C63  | 115.3(7)  |
| C24  | C25  | C26  | 120.1(4) | C64  | C63  | C62  | 111.9(6)  |
| C24  | C25  | C83  | 115.8(4) | C65  | C64  | C63  | 118.8(7)  |
| C26  | C25  | C83  | 123.5(4) | C64  | C65  | C66  | 107.9(7)  |
| C25  | C26  | C31  | 123.9(4) | C66A | C65  | C64  | 130.9(9)  |
| C27  | C26  | C25  | 118.6(4) | C67  | C66  | C65  | 115.1(9)  |
| C27  | C26  | C31  | 117.5(4) | C68  | C67  | C66  | 115.6(10) |
| C22  | C27  | C28  | 117.6(4) | C69  | C68  | C67  | 113.6(10) |
| C26  | C27  | C22  | 120.6(4) | O71  | C70  | O72  | 123.8(5)  |
| C26  | C27  | C28  | 121.8(4) | O71  | C70  | C17  | 123.2(5)  |
| C27  | C28  | C15  | 119.4(4) | O72  | C70  | C17  | 112.6(4)  |
| C29  | C28  | C15  | 122.9(4) | O72  | C73  | C74  | 105.0(9)  |
| C29  | C28  | C27  | 117.6(4) | C75  | C74  | C73  | 99.1(12)  |
| C28  | C29  | C30  | 118.9(4) | C74  | C75  | C76  | 104.9(11) |
| C28  | C29  | C44  | 124.8(4) | C77  | C76  | C75  | 116.4(10) |
| C30  | C29  | C44  | 116.3(4) | C76  | C77  | C78  | 112.4(10) |
| C31  | C30  | C29  | 122.4(4) | C79  | C78  | C77  | 111.7(10) |
| C26  | C31  | C96  | 126.3(5) | C80  | C79  | C78  | 116.5(10) |
| C30  | C31  | C26  | 119.9(4) | C79  | C80  | C81  | 116.0(11) |
| C30  | C31  | C96  | 113.4(4) | C80  | C81  | C82  | 115.3(12) |
| C33  | C32  | C19  | 173.3(5) | O84  | C83  | O85  | 124.4(4)  |
| C32  | C33  | C34  | 178.2(6) | O84  | C83  | C25  | 122.2(5)  |
| C35  | C34  | C33  | 122.4(4) | O85  | C83  | C25  | 113.4(4)  |
| C35  | C34  | C39  | 118.1(5) | C87  | C86  | O85  | 111.0(12) |
| C39  | C34  | C33  | 119.5(4) | C87A | C86  | O85  | 106.9(10) |
| C34  | C35  | C36  | 120.8(5) | C88  | C87  | C86  | 124.3(15) |
| C35  | C36  | C37  | 121.2(5) | C89  | C88  | C87  | 139.8(13) |
| C36  | C37  | C40  | 120.5(5) | C89  | C88  | C87A | 135.3(11) |
| C38  | C37  | C36  | 117.6(5) | C88  | C89  | C90  | 137.4(12) |
| C38  | C37  | C40  | 121.8(5) | C88  | C89  | C90A | 139.0(11) |
| C37  | C38  | C39  | 120.6(5) | C89  | C90  | C91  | 125.5(15) |
| C34  | C39  | C38  | 121.6(5) | C92  | C91  | C90  | 131.4(15) |
| C37  | C40  | C41  | 109.8(5) | C90A | C91  | C92A | 115.0(12) |
| C42  | C40  | C37  | 112.5(6) | C93  | C92  | C91  | 133.8(19) |
| C42  | C40  | C41  | 104.2(8) | C92  | C93  | C94  | 157.0(14) |
| C43  | C40  | C37  | 110.9(5) | C92A | C93  | C94  | 108.9(11) |
| C43  | C40  | C41  | 106.0(8) | C95  | C94  | C93  | 117.7(9)  |
| C43  | C40  | C42  | 112.9(7) | O97  | C96  | O98  | 125.1(5)  |
| C45  | C44  | C29  | 171.5(5) | O97  | C96  | C31  | 122.8(5)  |
| C44  | C45  | C46  | 176.1(6) | O98  | C96  | C31  | 111.8(4)  |
| C47  | C46  | C45  | 122.5(5) | C100 | C99  | O98  | 109.5(9)  |
| C51  | C46  | C45  | 119.2(5) | C99  | C100 | C101 | 132.4(12) |
| C51  | C46  | C47  | 118.3(5) | C100 | C101 | C102 | 102.8(10) |
| C48  | C47  | C46  | 120.0(5) | C100 | C101 | C10A | 153(2)    |
| C47  | C48  | C49  | 122.2(6) | C101 | C102 | C103 | 108.9(10) |

| Atom | Atom | Atom | Angle/°   |
|------|------|------|-----------|
| C104 | C103 | C102 | 117.9(10) |
| C10A | C103 | C10B | 158(3)    |
| C105 | C104 | C103 | 127.0(11) |
| C104 | C105 | C106 | 127.9(11) |
| C10B | C105 | C106 | 136.5(19) |
| C107 | C106 | C105 | 110.1(15) |
| C10C | C106 | C105 | 125.3(13) |
| C106 | C107 | C108 | 107.4(17) |
| C65  | C66A | C67A | 110.4(14) |

| Atom | Atom | Atom | Angle/°   |
|------|------|------|-----------|
| C68A | C67A | C66A | 97.2(14)  |
| C69A | C68A | C67A | 123.3(16) |
| C88  | C87A | C86  | 124.8(12) |
| C89  | C90A | C91  | 120.7(12) |
| C93  | C92A | C91  | 108.4(13) |
| C101 | C10A | C103 | 113.3(17) |
| C103 | C10B | C105 | 128(2)    |
| C106 | C10C | C108 | 107.6(15) |

**Table 5:** Torsion Angles in ° for 20Hir\_CW02\_2.

| Atom | Atom | Atom | Atom | Angle/°   |
|------|------|------|------|-----------|
| O58  | C59  | C61  | C62  | -74.0(8)  |
| O72  | C73  | C74  | C75  | -83.0(12) |
| O85  | C86  | C87  | C88  | -55(2)    |
| O85  | C86  | C87A | C88  | 64.9(18)  |
| O98  | C99  | C100 | C101 | 47.8(17)  |
| C11  | C12  | C13  | C14  | -8.7(8)   |
| C11  | C12  | C13  | C17  | 171.4(5)  |
| C11  | C12  | C56  | O57  | 144.1(6)  |
| C11  | C12  | C56  | O58  | -31.4(7)  |
| C12  | C11  | C16  | C15  | 3.5(9)    |
| C12  | C13  | C14  | C15  | 13.1(7)   |
| C12  | C13  | C14  | C21  | -167.4(5) |
| C12  | C13  | C17  | C18  | 175.7(5)  |
| C12  | C13  | C17  | C70  | -11.4(8)  |
| C13  | C12  | C56  | O57  | -26.4(9)  |
| C13  | C12  | C56  | O58  | 158.1(5)  |
| C13  | C14  | C15  | C16  | -9.5(7)   |
| C13  | C14  | C15  | C28  | 172.3(4)  |
| C13  | C14  | C21  | C19  | -13.5(7)  |
| C13  | C14  | C21  | C22  | 164.4(4)  |
| C13  | C17  | C18  | C19  | -3.1(8)   |
| C13  | C17  | C70  | O71  | 143.4(6)  |
| C13  | C17  | C70  | O72  | -43.7(7)  |
| C14  | C13  | C17  | C18  | -4.2(7)   |
| C14  | C13  | C17  | C70  | 168.6(5)  |
| C14  | C15  | C16  | C11  | 1.0(8)    |
| C14  | C15  | C28  | C27  | 23.6(7)   |
| C14  | C15  | C28  | C29  | -158.3(5) |
| C14  | C21  | C22  | C23  | -154.5(5) |
| C14  | C21  | C22  | C27  | 24.2(7)   |
| C15  | C14  | C21  | C19  | 166.0(4)  |
| C15  | C14  | C21  | C22  | -16.1(7)  |
| C15  | C28  | C29  | C30  | -164.9(5) |
| C15  | C28  | C29  | C44  | 16.1(8)   |
| C16  | C11  | C12  | C13  | 0.5(9)    |
| C16  | C11  | C12  | C56  | -170.2(5) |
| C16  | C15  | C28  | C27  | -154.6(5) |
| C16  | C15  | C28  | C29  | 23.5(8)   |
| C17  | C13  | C14  | C15  | -166.9(4) |
| C17  | C13  | C14  | C21  | 12.6(7)   |
| C17  | C18  | C19  | C21  | 2.2(7)    |
| C17  | C18  | C19  | C32  | 178.1(5)  |

| Atom | Atom | Atom | Atom | Angle/°   |
|------|------|------|------|-----------|
| C18  | C17  | C70  | O71  | -43.4(7)  |
| C18  | C17  | C70  | O72  | 129.5(5)  |
| C18  | C19  | C21  | C14  | 6.0(7)    |
| C18  | C19  | C21  | C22  | -171.8(5) |
| C19  | C21  | C22  | C23  | 23.3(7)   |
| C19  | C21  | C22  | C27  | -157.9(5) |
| C21  | C14  | C15  | C16  | 171.0(5)  |
| C21  | C14  | C15  | C28  | -7.2(7)   |
| C21  | C22  | C23  | C24  | -172.9(5) |
| C21  | C22  | C27  | C26  | 171.4(4)  |
| C21  | C22  | C27  | C28  | -7.9(7)   |
| C22  | C23  | C24  | C25  | -0.7(8)   |
| C22  | C27  | C28  | C15  | -15.6(7)  |
| C22  | C27  | C28  | C29  | 166.2(4)  |
| C23  | C22  | C27  | C26  | -9.8(7)   |
| C23  | C22  | C27  | C28  | 170.9(5)  |
| C23  | C24  | C25  | C26  | -5.7(8)   |
| C23  | C24  | C25  | C83  | 166.3(5)  |
| C24  | C25  | C26  | C27  | 4.1(7)    |
| C24  | C25  | C26  | C31  | -175.2(5) |
| C24  | C25  | C83  | O84  | -131.6(5) |
| C24  | C25  | C83  | O85  | 45.4(6)   |
| C25  | C26  | C27  | C22  | 3.7(7)    |
| C25  | C26  | C27  | C28  | -177.1(4) |
| C25  | C26  | C31  | C30  | -172.2(5) |
| C25  | C26  | C31  | C96  | 16.0(8)   |
| C26  | C25  | C83  | O84  | 40.1(7)   |
| C26  | C25  | C83  | O85  | -142.9(5) |
| C26  | C27  | C28  | C15  | 165.1(5)  |
| C26  | C27  | C28  | C29  | -13.1(7)  |
| C26  | C31  | C96  | O97  | -148.5(5) |
| C26  | C31  | C96  | O98  | 36.5(7)   |
| C27  | C22  | C23  | C24  | 8.3(7)    |
| C27  | C26  | C31  | C30  | 8.5(7)    |
| C27  | C26  | C31  | C96  | -163.3(5) |
| C27  | C28  | C29  | C30  | 13.2(7)   |
| C27  | C28  | C29  | C44  | -165.8(5) |
| C28  | C15  | C16  | C11  | 179.1(5)  |
| C28  | C29  | C30  | C31  | -2.8(8)   |
| C29  | C30  | C31  | C26  | -8.4(8)   |
| C29  | C30  | C31  | C96  | 164.4(5)  |
| C30  | C31  | C96  | O97  | 39.2(7)   |
| C30  | C31  | C96  | O98  | -135.7(5) |
| C31  | C26  | C27  | C22  | -177.0(4) |
| C31  | C26  | C27  | C28  | 2.2(7)    |
| C32  | C19  | C21  | C14  | -169.4(5) |
| C32  | C19  | C21  | C22  | 12.8(8)   |
| C33  | C34  | C35  | C36  | 178.2(6)  |
| C33  | C34  | C39  | C38  | -177.9(7) |
| C34  | C35  | C36  | C37  | 0.0(10)   |
| C35  | C34  | C39  | C38  | 1.0(11)   |
| C35  | C36  | C37  | C38  | 0.4(10)   |
| C35  | C36  | C37  | C40  | -175.6(6) |
| C36  | C37  | C38  | C39  | -0.1(11)  |
| C36  | C37  | C40  | C41  | -156.0(8) |
| C36  | C37  | C40  | C42  | -40.4(9)  |
| C36  | C37  | C40  | C43  | 87.2(8)   |
| C37  | C38  | C39  | C34  | -0.6(13)  |
| C38  | C37  | C40  | C41  | 28.2(10)  |
| C38  | C37  | C40  | C42  | 143.8(8)  |
| C38  | C37  | C40  | C43  | -88.6(9)  |

| Atom | Atom | Atom | Atom | Angle/°    |
|------|------|------|------|------------|
| C39  | C34  | C35  | C36  | -0.7(9)    |
| C40  | C37  | C38  | C39  | 175.8(7)   |
| C44  | C29  | C30  | C31  | 176.2(5)   |
| C45  | C46  | C47  | C48  | 178.6(6)   |
| C45  | C46  | C51  | C50  | -178.5(5)  |
| C46  | C47  | C48  | C49  | -0.5(10)   |
| C47  | C46  | C51  | C50  | 1.1(8)     |
| C47  | C48  | C49  | C50  | 2.0(9)     |
| C47  | C48  | C49  | C52  | 178.8(6)   |
| C48  | C49  | C50  | C51  | -1.9(9)    |
| C48  | C49  | C52  | C53  | -67.9(9)   |
| C48  | C49  | C52  | C54  | 51.0(8)    |
| C48  | C49  | C52  | C55  | 170.9(6)   |
| C49  | C50  | C51  | C46  | 0.4(9)     |
| C50  | C49  | C52  | C53  | 108.7(9)   |
| C50  | C49  | C52  | C54  | -132.4(7)  |
| C50  | C49  | C52  | C55  | -12.6(9)   |
| C51  | C46  | C47  | C48  | -1.1(9)    |
| C52  | C49  | C50  | C51  | -178.6(6)  |
| C56  | O58  | C59  | C61  | -172.7(5)  |
| C56  | C12  | C13  | C14  | 161.6(5)   |
| C56  | C12  | C13  | C17  | -18.3(8)   |
| C59  | O58  | C56  | O57  | -6.8(8)    |
| C59  | O58  | C56  | C12  | 168.6(5)   |
| C59  | C61  | C62  | C63  | -171.9(7)  |
| C61  | C62  | C63  | C64  | 173.1(7)   |
| C62  | C63  | C64  | C65  | 173.0(7)   |
| C63  | C64  | C65  | C66  | 65.8(10)   |
| C63  | C64  | C65  | C66A | -23.1(17)  |
| C64  | C65  | C66  | C67  | 161.1(9)   |
| C64  | C65  | C66A | C67A | 164.0(12)  |
| C65  | C66  | C67  | C68  | 56.2(15)   |
| C65  | C66A | C67A | C68A | 136.6(17)  |
| C66  | C67  | C68  | C69  | 177.4(11)  |
| C70  | O72  | C73  | C74  | -166.4(8)  |
| C70  | C17  | C18  | C19  | -176.7(5)  |
| C73  | O72  | C70  | O71  | -9.7(10)   |
| C73  | O72  | C70  | C17  | 177.5(8)   |
| C73  | C74  | C75  | C76  | -167.3(9)  |
| C74  | C75  | C76  | C77  | -69.3(15)  |
| C75  | C76  | C77  | C78  | -174.7(11) |
| C76  | C77  | C78  | C79  | -178.5(13) |
| C77  | C78  | C79  | C80  | 157.8(13)  |
| C78  | C79  | C80  | C81  | -177.8(13) |
| C79  | C80  | C81  | C82  | -55.7(18)  |
| C83  | O85  | C86  | C87  | -144.7(10) |
| C83  | O85  | C86  | C87A | 168.4(8)   |
| C83  | C25  | C26  | C27  | -167.2(4)  |
| C83  | C25  | C26  | C31  | 13.5(8)    |
| C86  | O85  | C83  | O84  | 5.0(8)     |
| C86  | O85  | C83  | C25  | -172.0(6)  |
| C86  | C87  | C88  | C89  | -150.5(16) |
| C87  | C88  | C89  | C90A | 176(2)     |
| C88  | C89  | C90  | C91  | -151.1(16) |
| C88  | C89  | C90A | C91  | 146.4(14)  |
| C89  | C88  | C87A | C86  | 160.3(13)  |
| C89  | C90  | C91  | C92  | -10(4)     |
| C90  | C91  | C92  | C93  | -163(2)    |
| C91  | C92  | C93  | C94  | -91(4)     |
| C92  | C93  | C94  | C95  | -138(3)    |
| C94  | C93  | C92A | C91  | -172.6(11) |

| Atom | Atom | Atom | Atom | Angle/°    |
|------|------|------|------|------------|
| C96  | O98  | C99  | C100 | -146.9(8)  |
| C99  | O98  | C96  | O97  | 3.1(9)     |
| C99  | O98  | C96  | C31  | 177.9(7)   |
| C99  | C100 | C101 | C102 | 55.1(16)   |
| C99  | C100 | C101 | C10A | 122(3)     |
| C100 | C101 | C102 | C103 | 166.1(10)  |
| C100 | C101 | C10A | C103 | -90(4)     |
| C101 | C102 | C103 | C104 | -176.2(11) |
| C102 | C103 | C104 | C105 | -178.1(13) |
| C103 | C104 | C105 | C106 | 174.0(12)  |
| C104 | C105 | C106 | C10C | 158.4(18)  |
| C105 | C106 | C107 | C108 | -165.7(17) |
| C105 | C106 | C10C | C108 | -137.2(13) |
| C106 | C105 | C10B | C103 | -146(3)    |
| C66A | C67A | C68A | C69A | -177(2)    |
| C87A | C88  | C89  | C90  | -171(2)    |
| C90A | C91  | C92A | C93  | -85.5(18)  |
| C92A | C91  | C90A | C89  | 167.7(13)  |
| C92A | C93  | C94  | C95  | -176.6(14) |
| C10A | C103 | C10B | C105 | -93(7)     |
| C10B | C103 | C10A | C101 | -128(4)    |
| C10B | C105 | C106 | C107 | 165(3)     |

**Table 6:** Hydrogen Fractional Atomic Coordinates ( $\times 10^4$ ) and Equivalent Isotropic Displacement Parameters ( $\text{\AA}^2 \times 10^3$ ) for **20Hir\_CW02\_2**.  $U_{eq}$  is defined as 1/3 of the trace of the orthogonalised  $U_{ij}$ .

| Atom | x       | y       | z        | $U_{eq}$ |
|------|---------|---------|----------|----------|
| H11  | 7346.45 | 5471.61 | 2914.47  | 47       |
| H16  | 5836.69 | 5517.76 | 3839.04  | 45       |
| H18  | 5945.91 | 6342.24 | -333.4   | 38       |
| H23  | 4001.13 | 4888.39 | 1162.06  | 37       |
| H24  | 2692.75 | 4522.94 | 2034.37  | 36       |
| H30  | 2891.82 | 5786.9  | 5511.01  | 38       |
| H35  | 2231.86 | 6127.34 | 342.1    | 50       |
| H36  | 1286.92 | 6510.31 | -446.15  | 54       |
| H38  | 3247.11 | 7218.38 | -2407.13 | 74       |
| H39  | 4187.25 | 6820.46 | -1615.5  | 68       |
| H41A | 2453.45 | 7544.76 | -3136.8  | 180      |
| H41B | 1651.19 | 7397.46 | -3317.14 | 180      |
| H41C | 2469.76 | 6601.59 | -3218.58 | 180      |
| H42A | 1343.25 | 6035.99 | -2002.09 | 124      |
| H42B | 638.22  | 6765.38 | -2321.04 | 124      |
| H42C | 450.38  | 6710.18 | -1314.51 | 124      |
| H43A | 535.04  | 8212.1  | -1122.05 | 122      |
| H43B | 451.52  | 8320.18 | -2040.63 | 122      |
| H43C | 1268.03 | 8503.25 | -1921.37 | 122      |
| H47  | 3813.89 | 8404.93 | 5754     | 56       |
| H48  | 4195.38 | 9054.65 | 6649.34  | 64       |
| H50  | 5955.12 | 6761.21 | 6929.58  | 51       |
| H51  | 5587.74 | 6105.49 | 6039.77  | 48       |
| H53A | 6538.93 | 8605.13 | 6536.63  | 145      |
| H53B | 6012.49 | 9329.1  | 7297.1   | 145      |
| H53C | 5603.68 | 9340.79 | 6586.15  | 145      |
| H54A | 4068.9  | 9400.93 | 7936.17  | 107      |
| H54B | 4619.66 | 9340.52 | 8536.4   | 107      |
| H54C | 4129.04 | 8664.59 | 8605.78  | 107      |
| H55A | 5649.26 | 7340.98 | 8207.18  | 104      |
| H55B | 5954.43 | 8063.61 | 8422.12  | 104      |
| H55C | 6566.09 | 7494.02 | 7540.14  | 104      |
| H59A | 9803.62 | 5707.52 | 627.74   | 78       |

| Atom | x        | y        | z       | $U_{eq}$ |
|------|----------|----------|---------|----------|
| H59B | 9861.42  | 4779.29  | 983.7   | 78       |
| H61A | 10742.77 | 5174.07  | 1499.22 | 78       |
| H61B | 9799.09  | 5299.37  | 2317.01 | 78       |
| H62A | 9319.65  | 6766.95  | 2205.44 | 78       |
| H62B | 10174.94 | 6685.62  | 1309.26 | 78       |
| H63A | 10290.98 | 6387.93  | 2971.82 | 78       |
| H63B | 11188.78 | 6186.84  | 2089.45 | 78       |
| H64A | 10799.81 | 7623.6   | 1778.76 | 78       |
| H64B | 9835.91  | 7852.79  | 2584.15 | 78       |
| H65A | 10643.61 | 7579.8   | 3526.67 | 78       |
| H65B | 10773.02 | 8357.65  | 2920.31 | 78       |
| H65C | 11510.21 | 7756.28  | 2499.76 | 78       |
| H65D | 10517.98 | 8333.92  | 3118.28 | 78       |
| H66A | 12100.34 | 6661.43  | 2689.69 | 78       |
| H66B | 12186.82 | 7252.05  | 1882.96 | 78       |
| H67A | 13207.54 | 7277.71  | 2515.38 | 78       |
| H67B | 12488.32 | 8207.54  | 2550.1  | 78       |
| H68A | 11641.28 | 8110.88  | 4038.84 | 78       |
| H68B | 12325.7  | 7162.86  | 4012.25 | 78       |
| H69A | 13545.61 | 7680.9   | 3742.81 | 97       |
| H69B | 12700.73 | 8112.45  | 4623.58 | 97       |
| H69C | 12865.2  | 8630.01  | 3761.63 | 97       |
| H73A | 8094.85  | 7630.53  | -688.57 | 135      |
| H73B | 8820.05  | 6735.75  | -597.78 | 135      |
| H74A | 8412.67  | 7416.46  | 953.19  | 135      |
| H74B | 9133.58  | 7720.3   | 132.68  | 135      |
| H75A | 7144.6   | 8561.05  | 870.18  | 135      |
| H75B | 7768.07  | 8787.41  | -66.34  | 135      |
| H76A | 8707.45  | 9129.93  | 626.05  | 135      |
| H76B | 7677.93  | 9790.97  | 947.86  | 135      |
| H77A | 8371.35  | 8460.96  | 1869.11 | 135      |
| H77B | 7308.66  | 9051.97  | 2189.05 | 135      |
| H78A | 8798.76  | 9752.57  | 1934.03 | 135      |
| H78B | 7730.35  | 10331.59 | 2276.93 | 135      |
| H79A | 7407.3   | 9780.34  | 3607.68 | 135      |
| H79B | 8294.22  | 8941.03  | 3268.82 | 135      |
| H80A | 8318.87  | 10544.67 | 3547.4  | 135      |
| H80B | 9219.89  | 9721.45  | 3174.13 | 135      |
| H81A | 8822.52  | 9998.58  | 4617.67 | 135      |
| H81B | 8812.33  | 9086.17  | 4455.16 | 135      |
| H82A | 7037.34  | 10444.67 | 5016.5  | 169      |
| H82B | 7440.43  | 10078.62 | 5741.7  | 169      |
| H82C | 7231.86  | 9468.16  | 5241.33 | 169      |
| H86A | 418.71   | 3956.76  | 4351.58 | 103      |
| H86B | 159.46   | 4637.06  | 3678.77 | 103      |
| H86C | 229.04   | 4425.03  | 4290.72 | 103      |
| H86D | 316.45   | 4337.19  | 3320.71 | 103      |
| H87A | 854.1    | 3012.17  | 4347.81 | 103      |
| H87B | 8.61     | 3211.48  | 4072.82 | 103      |
| H88A | 1835.18  | 2503.21  | 2853.73 | 103      |
| H88B | 1153.65  | 2445.29  | 3801.45 | 103      |
| H88C | 1253.25  | 2842.23  | 2665.46 | 103      |
| H88D | 1809.52  | 2352.85  | 3225.77 | 103      |
| H89A | 1329.45  | 1809     | 2332.96 | 103      |
| H89B | 520.35   | 1833.68  | 3225.81 | 103      |
| H89C | 554.78   | 1925.05  | 2969.56 | 103      |
| H89D | 1167.19  | 1429.12  | 3479.95 | 103      |
| H90A | 1244.75  | 725.89   | 3604.52 | 103      |
| H90B | 2221.1   | 807.57   | 3049.72 | 103      |
| H91A | 2503.14  | -46.77   | 2162.32 | 103      |
| H91B | 1620.63  | -243.86  | 2802.19 | 103      |



| Atom | x        | y        | z       | $U_{eq}$ |
|------|----------|----------|---------|----------|
| H91C | 1205.22  | 169.67   | 2797.98 | 103      |
| H91D | 2220.02  | -21.91   | 2757.42 | 103      |
| H92A | 902.8    | 603.43   | 1957.11 | 103      |
| H92B | 1907.36  | 506.99   | 1290.96 | 103      |
| H93A | 944.65   | -105.87  | 1211.96 | 103      |
| H93B | 1362.64  | -794.17  | 1756.8  | 103      |
| H93C | 1287.45  | 143.25   | 1071.51 | 103      |
| H93D | 1031.14  | -535.32  | 1772.36 | 103      |
| H94A | 2440.97  | -1001.08 | 76.59   | 103      |
| H94B | 2127.88  | -1656.57 | 769.64  | 103      |
| H95A | 1308.75  | -1713.1  | 129.82  | 128      |
| H95B | 1442.21  | -903.07  | -410.1  | 128      |
| H95C | 640.36   | -778.69  | 533.99  | 128      |
| H99A | 1421.8   | 3862     | 6199.43 | 116      |
| H99B | 1031.69  | 3778.15  | 5497.95 | 116      |
| H10A | 2067.87  | 2597.36  | 4972.47 | 116      |
| H10B | 1690.65  | 2536.27  | 5984.85 | 116      |
| H10C | 3481.46  | 2407     | 4915.61 | 116      |
| H10D | 3115.37  | 1667     | 5431.77 | 116      |
| H10E | 3230.37  | 2755.57  | 5435.41 | 116      |
| H10F | 3284.74  | 2085.8   | 4824.61 | 116      |
| H10G | 2456.63  | 2579.01  | 6733.67 | 116      |
| H10H | 3061     | 3141.53  | 6171.43 | 116      |
| H10J | 3849.02  | 1363.2   | 6375.74 | 116      |
| H10I | 4428.99  | 1956.31  | 5875.4  | 116      |
| H10L | 3489.97  | 1706.75  | 6885.27 | 116      |
| H10K | 3473.05  | 2541.02  | 6400.43 | 116      |
| H10M | 3971.39  | 2670.81  | 7186.66 | 116      |
| H10N | 3425.6   | 2056.05  | 7674.14 | 116      |
| H10P | 5327.11  | 1543.27  | 6930.6  | 116      |
| H10O | 4736.37  | 993.19   | 7504.57 | 116      |
| H10R | 5350.35  | 1145.1   | 7083.23 | 116      |
| H10Q | 4323.69  | 1261.97  | 7694.23 | 116      |
| H10U | 5518.77  | 1868.2   | 7996.85 | 116      |
| H10V | 4429.62  | 2245.35  | 8553.84 | 116      |
| H10S | 5206.02  | 2201.35  | 8038.54 | 116      |
| H10T | 4324.6   | 1991.84  | 8674.73 | 116      |
| H10W | 5605.35  | 540.79   | 8451.82 | 116      |
| H10X | 4504.3   | 786.44   | 8831.82 | 116      |
| H    | 4272.37  | 1526.89  | 9774.35 | 145      |
| H10Y | 5092.57  | 745.99   | 9890.54 | 145      |
| HA   | 5133.57  | 1684.29  | 9825.64 | 145      |
| HB   | 5401.17  | 1557.69  | 9508.24 | 145      |
| HC   | 5061.57  | 793.69   | 9965.54 | 145      |
| HD   | 4323.47  | 1696.49  | 9937.44 | 145      |
| H66C | 11370.71 | 6722.8   | 3583.87 | 78       |
| H66D | 10513.25 | 7484.48  | 4199.75 | 78       |
| H67C | 12392.03 | 7252.33  | 3663.36 | 78       |
| H67D | 11790.41 | 8213.48  | 3547.24 | 78       |
| H68C | 10620.67 | 8184.68  | 4924.07 | 78       |
| H68D | 11242.94 | 7259.5   | 5039.12 | 78       |
| H69D | 12248.66 | 8023.87  | 5106.3  | 97       |
| H69E | 11383.94 | 7970.44  | 5944.8  | 97       |
| H69F | 11295.82 | 8806.98  | 5402.48 | 97       |
| H87C | 15.55    | 3436.45  | 3381.04 | 103      |
| H87D | 868.34   | 3575.78  | 2606.53 | 103      |
| H90C | 2358.75  | 1121     | 1986.11 | 103      |
| H90D | 1460.34  | 1259.73  | 1809.78 | 103      |
| H92C | 2744.6   | -289.46  | 1036.73 | 128      |
| H92D | 2579.32  | -1060.23 | 1640.16 | 128      |
| H1   | 4242.51  | 1369.56  | 5224.49 | 116      |

| Atom | x       | y       | z       | $U_{eq}$ |
|------|---------|---------|---------|----------|
| HG   | 3402.64 | 1170.39 | 5980.18 | 116      |
| H10  | 4097.19 | 2677.96 | 7049.85 | 116      |
| HF   | 5003.04 | 2117.33 | 6299.37 | 116      |
| H10Z | 6090.32 | 1199.25 | 8395.44 | 116      |
| HE   | 5574.06 | 558.55  | 8400.17 | 116      |

**Table 7:** Atomic Occupancies for all atoms that are not fully occupied in **20Hir\_CW02\_2**.

| Atom | Occupancy | Atom | Occupancy | Atom | Occupancy | Atom | Occupancy |
|------|-----------|------|-----------|------|-----------|------|-----------|
| H65A | 0.628(7)  | H88D | 0.405(16) | H10I | 0.788(13) | H67C | 0.372(7)  |
| H65B | 0.628(7)  | H89A | 0.420(13) | H10L | 0.212(13) | H67D | 0.372(7)  |
| H65C | 0.372(7)  | H89B | 0.420(13) | H10K | 0.212(13) | C68A | 0.372(7)  |
| H65D | 0.372(7)  | H89C | 0.580(13) | C104 | 0.788(13) | H68C | 0.372(7)  |
| C66  | 0.628(7)  | H89D | 0.580(13) | H10M | 0.788(13) | H68D | 0.372(7)  |
| H66A | 0.628(7)  | C90  | 0.420(13) | H10N | 0.788(13) | C69A | 0.372(7)  |
| H66B | 0.628(7)  | H90A | 0.420(13) | H10P | 0.788(13) | H69D | 0.372(7)  |
| C67  | 0.628(7)  | H90B | 0.420(13) | H10O | 0.788(13) | H69E | 0.372(7)  |
| H67A | 0.628(7)  | H91A | 0.420(13) | H10R | 0.212(13) | H69F | 0.372(7)  |
| H67B | 0.628(7)  | H91B | 0.420(13) | H10Q | 0.212(13) | C87A | 0.595(16) |
| C68  | 0.628(7)  | H91C | 0.580(13) | H10U | 0.43(2)   | H87C | 0.595(16) |
| H68A | 0.628(7)  | H91D | 0.580(13) | H10V | 0.43(2)   | H87D | 0.595(16) |
| H68B | 0.628(7)  | C92  | 0.420(13) | H10S | 0.57(2)   | C90A | 0.580(13) |
| C69  | 0.628(7)  | H92A | 0.420(13) | H10T | 0.57(2)   | H90C | 0.580(13) |
| H69A | 0.628(7)  | H92B | 0.420(13) | C107 | 0.43(2)   | H90D | 0.580(13) |
| H69B | 0.628(7)  | H93A | 0.420(13) | H10W | 0.43(2)   | C92A | 0.580(13) |
| H69C | 0.628(7)  | H93B | 0.420(13) | H10X | 0.43(2)   | H92C | 0.580(13) |
| H86A | 0.595(16) | H93C | 0.580(13) | H    | 0.57(2)   | H92D | 0.580(13) |
| H86B | 0.595(16) | H93D | 0.580(13) | H10Y | 0.57(2)   | C10A | 0.212(13) |
| H86C | 0.405(16) | H10C | 0.788(13) | HA   | 0.57(2)   | H1   | 0.212(13) |
| H86D | 0.405(16) | H10D | 0.788(13) | HB   | 0.43(2)   | HG   | 0.212(13) |
| C87  | 0.405(16) | H10E | 0.212(13) | HC   | 0.43(2)   | C10B | 0.212(13) |
| H87A | 0.405(16) | H10F | 0.212(13) | HD   | 0.43(2)   | H10  | 0.212(13) |
| H87B | 0.405(16) | C102 | 0.788(13) | C66A | 0.372(7)  | HF   | 0.212(13) |
| H88A | 0.595(16) | H10G | 0.788(13) | H66C | 0.372(7)  | C10C | 0.57(2)   |
| H88B | 0.595(16) | H10H | 0.788(13) | H66D | 0.372(7)  | H10Z | 0.57(2)   |
| H88C | 0.405(16) | H10J | 0.788(13) | C67A | 0.372(7)  | HE   | 0.57(2)   |

## Citations

CrysAlisPro (ROD), Rigaku Oxford Diffraction, Poland (?).

CrysAlisPro Software System, Rigaku Oxford Diffraction, (2019).

O.V. Dolomanov and L.J. Bourhis and R.J. Gildea and J.A.K. Howard and H. Puschmann, Olex2: A complete structure solution, refinement and analysis program, *J. Appl. Cryst.*, (2009), **42**, 339-341.

Sheldrick, G.M., Crystal structure refinement with ShelXL, *Acta Cryst.*, (2015), **C71**, 3-8.

Sheldrick, G.M., ShelXT-Integrated space-group and crystal-structure determination, *Acta Cryst.*, (2015), **A71**, 3-8.

## Crystal data and structure refinement for 20Hir\_CD02\_2 (1.6-PTE-(PPB)<sub>2</sub>)

|                                                |                                                  |
|------------------------------------------------|--------------------------------------------------|
| <b>Compound</b>                                | <b>20Hir_CD02_2</b>                              |
| Formula                                        | C <sub>176</sub> H <sub>220</sub> O <sub>8</sub> |
| <i>D</i> <sub>calc.</sub> / g cm <sup>-3</sup> | 1.058                                            |
| $\mu$ /mm <sup>-1</sup>                        | 0.476                                            |
| Formula Weight                                 | 2463.51                                          |
| Colour                                         | clear light yellow                               |
| Shape                                          | block                                            |
| Size/mm <sup>3</sup>                           | 0.63×0.29×0.21                                   |
| <i>T</i> /K                                    | 123.00(10)                                       |
| Crystal System                                 | triclinic                                        |
| Space Group                                    | <i>P</i> -1                                      |
| <i>a</i> /Å                                    | 15.3455(4)                                       |
| <i>b</i> /Å                                    | 18.7629(5)                                       |
| <i>c</i> /Å                                    | 28.3210(5)                                       |
| $\alpha$ /°                                    | 105.764(2)                                       |
| $\beta$ /°                                     | 95.876(2)                                        |
| $\gamma$ /°                                    | 95.998(2)                                        |
| <i>V</i> /Å <sup>3</sup>                       | 7731.5(3)                                        |
| <i>Z</i>                                       | 2                                                |
| <i>Z'</i>                                      | 1                                                |
| Wavelength/Å                                   | 1.54184                                          |
| Radiation type                                 | Cu K $\alpha$                                    |
| $\theta$ <sub>min</sub> /°                     | 2.923                                            |
| $\theta$ <sub>max</sub> /°                     | 72.412                                           |
| Measured Refl's.                               | 48409                                            |
| Indep't Refl's                                 | 29169                                            |
| Refl's I $\geq$ 2 $\sigma$ (I)                 | 21002                                            |
| <i>R</i> <sub>int</sub>                        | 0.0483                                           |
| Parameters                                     | 1605                                             |
| Restraints                                     | 28                                               |
| Largest Peak                                   | 2.029                                            |
| Deepest Hole                                   | -0.926                                           |
| Goof                                           | 1.537                                            |
| <i>wR</i> <sub>2</sub> (all data)              | 0.3996                                           |
| <i>wR</i> <sub>2</sub>                         | 0.3528                                           |
| <i>R</i> <sub>1</sub> (all data)               | 0.1572                                           |
| <i>R</i> <sub>1</sub>                          | 0.1307                                           |

**Experimental.** Single clear light yellow block crystals of **20Hir\_CD02\_2** recrystallised from a mixture of DCM and MeOH by solvent layering. A suitable crystal with dimensions 0.63 × 0.29 × 0.21 mm<sup>3</sup> was selected and mounted on a mylar loop in perfluoroether oil on a SuperNova, Dual, Cu at home/near, Atlas diffractometer. The crystal was kept at a steady *T* = 123.00(10) K during data collection. The structure was solved with the ShelXT (Sheldrick, 2015) solution program using dual methods and by using Olex2 (Dolomanov et al., 2009) as the graphical interface. The model was refined with ShelXL 2018/3 (Sheldrick, 2015) using full matrix least squares minimisation on *F*<sup>2</sup>.

**Crystal Data.** C<sub>176</sub>H<sub>220</sub>O<sub>8</sub>, *M<sub>r</sub>* = 2463.51, triclinic, *P*-1 (No. 2), *a* = 15.3455(4) Å, *b* = 18.7629(5) Å, *c* = 28.3210(5) Å,  $\alpha$  = 105.764(2)°,  $\beta$  = 95.876(2)°,  $\gamma$  = 95.998(2)°, *V* = 7731.5(3) Å<sup>3</sup>, *T* = 123.00(10) K, *Z* = 2, *Z'* = 1,  $\theta$ (Cu K $\alpha$ ) = 0.476, 48409 reflections measured, 29169 unique (*R*<sub>int</sub> = 0.0483) which were used in all calculations. The final *wR*<sub>2</sub> was 0.3996 (all data) and *R*<sub>1</sub> was 0.1307 (I $\geq$ 2  $\theta$ (I)).

A clear light yellow block-shaped crystal with dimensions  $0.63 \times 0.29 \times 0.21 \text{ mm}^3$  was mounted on a mylar loop in perfluoroether oil. Data were collected using a SuperNova, Dual, Cu at home/near, Atlas diffractometer equipped with a Cryojet - Oxford Instruments low-temperature device operating at  $T = 123.00(10) \text{ K}$ .

Data were measured using  $\omega$  scans using Cu  $K_{\alpha}$  radiation. The diffraction pattern was indexed and the total number of runs and images was based on the strategy calculation from the program CrysAlisPro (Rigaku, V1.171.40.53, 2019). The maximum resolution that was achieved was  $\Theta = 72.412^{\circ}$  (0.81 Å).

The diffraction pattern was indexed and the total number of runs and images was based on the strategy calculation from the program CrysAlisPro (Rigaku, V1.171.40.53, 2019). The unit cell was refined using CrysAlisPro (Rigaku, V1.171.40.53, 2019) on 14768 reflections, 31% of the observed reflections.

Data reduction, scaling and absorption corrections were performed using CrysAlisPro (Rigaku, V1.171.40.53, 2019). The final completeness is 98.70 % out to  $72.412^{\circ}$  in  $\Theta$ . A gaussian absorption correction was performed using CrysAlisPro 1.171.40.53 (Rigaku Oxford Diffraction, 2019) Numerical absorption correction based on gaussian integration over a multifaceted crystal model Empirical absorption correction using spherical harmonics, implemented in SCALE3 ABSPACK scaling algorithm.. The absorption coefficient  $\mu$  of this material is  $0.476 \text{ mm}^{-1}$  at this wavelength ( $\lambda = 1.54184 \text{ \AA}$ ) and the minimum and maximum transmissions are 0.316 and 1.000.

The structure was solved and the space group  $P-1$  (# 2) determined by the ShelXT (Sheldrick, 2015) structure solution program using using dual methods and refined by full matrix least squares minimisation on  $F^2$  using version 2018/3 of ShelXL 2018/3 (Sheldrick, 2015). All non-hydrogen atoms were refined anisotropically. Hydrogen atom positions were calculated geometrically and refined using the riding model. Hydrogen atom positions were calculated geometrically and refined using the riding model.

*\_refine\_special\_details*: The followind disorders have been resolved during refinement: C95-C102 : C95a - C10c = 52:48% occupation; C143 - C145 : C1f - C1d =55:45% occupation; the aliphatic chain C176 - C185 showed still a huge movement and disorder, which couldn't get modelled completely. Therefore, constraints of the ADP's and restraints of the bond length were necessary to model it. As a result, the chain is stable during the refinement, but unfortunately the GOF values got increased.. The rest electron density of  $2.0 \text{ e/A}^{-3}$  is an unavoidable artifact very close to the aliphatic chain. Also the alert regarding too close distances of modeled hydrogen atom positions is a result of the displacement of the carbon atoms in the chain.

*\_exptl\_absorpt\_process\_details*: CrysAlisPro 1.171.40.53 (Rigaku Oxford Diffraction, 2019) Numerical absorption correction based on gaussian integration over a multifaceted crystal model Empirical absorption correction using spherical harmonics as implemented in SCALE3 ABSPACK.

There is a single molecule in the asymmetric unit, which is represented by the reported sum formula. In other words: Z is 2 and Z' is 1.

**Table 8:** Fractional Atomic Coordinates ( $\times 10^4$ ) and Equivalent Isotropic Displacement Parameters ( $\text{\AA}^2 \times 10^3$ ) for **20Hir\_CD02\_2**.  $U_{eq}$  is defined as 1/3 of the trace of the orthogonalised  $U_{ij}$ .

| Atom | x          | y          | z          | $U_{eq}$ |
|------|------------|------------|------------|----------|
| 0134 | 4997.0(19) | 6157.5(17) | 3020.2(12) | 60.8(7)  |

| Atom | x           | y           | z           | $U_{eq}$ |
|------|-------------|-------------|-------------|----------|
| O135 | 5648(2)     | 6808(3)     | 3797.6(12)  | 81.9(12) |
| O148 | 4330.3(18)  | 7559.5(16)  | 3153.5(9)   | 52.1(6)  |
| O149 | 3584.1(16)  | 6914.3(14)  | 2413.2(9)   | 46.0(6)  |
| O161 | 11206.2(18) | 8004.7(19)  | 1698.4(11)  | 59.9(7)  |
| O162 | 10117.9(19) | 7960.3(17)  | 1078.1(10)  | 57.1(7)  |
| O174 | 9446.6(18)  | 9475.6(17)  | 977.8(11)   | 55.9(7)  |
| O175 | 10246(2)    | 9442.4(18)  | 1683.5(13)  | 64.6(8)  |
| C1   | 9123(2)     | 7515.3(19)  | 2483.1(12)  | 37.7(7)  |
| C2   | 9800(2)     | 7638(2)     | 2212.4(13)  | 41.8(7)  |
| C3   | 9714(2)     | 8039(2)     | 1873.5(13)  | 41.5(7)  |
| C4   | 8901(2)     | 8332.4(17)  | 1792.6(11)  | 34.1(6)  |
| C5   | 8771(2)     | 8821.8(19)  | 1493.0(12)  | 38.1(7)  |
| C6   | 7946(2)     | 9007.0(18)  | 1397.0(12)  | 36.8(6)  |
| C7   | 7210(2)     | 8709.4(17)  | 1566.2(11)  | 33.5(6)  |
| C8   | 7296.8(19)  | 8241.6(16)  | 1869.6(10)  | 29.4(6)  |
| C9   | 8174.9(19)  | 8107.8(16)  | 2020.6(10)  | 30.8(6)  |
| C10  | 8305(2)     | 7753.7(16)  | 2403.3(11)  | 32.8(6)  |
| C11  | 7584(2)     | 7656.3(16)  | 2691.6(11)  | 32.4(6)  |
| C12  | 6698(2)     | 7621.3(16)  | 2470.2(10)  | 31.9(6)  |
| C13  | 6541.8(19)  | 7864.9(16)  | 2029.2(10)  | 30.7(6)  |
| C14  | 5679(2)     | 7727.3(16)  | 1779.6(10)  | 31.8(6)  |
| C15  | 4980(2)     | 7453.1(18)  | 1995.0(11)  | 34.7(6)  |
| C16  | 5098(2)     | 7320.0(17)  | 2446.0(11)  | 34.6(6)  |
| C17  | 5973(2)     | 7365.7(17)  | 2687.1(11)  | 35.5(6)  |
| C18  | 6166(2)     | 7153.8(19)  | 3130.0(12)  | 40.3(7)  |
| C19  | 7010(2)     | 7327.2(19)  | 3376.8(12)  | 39.9(7)  |
| C20  | 7731(2)     | 7578.0(17)  | 3172.0(11)  | 34.2(6)  |
| C21  | 5402(2)     | 7862.1(17)  | 1287.1(11)  | 33.7(6)  |
| C22  | 4810(2)     | 8376.5(17)  | 1264.6(11)  | 33.3(6)  |
| C23  | 4475(2)     | 8454.9(17)  | 801.7(11)   | 33.2(6)  |
| C24  | 4750(2)     | 8017.1(17)  | 367.3(10)   | 33.1(6)  |
| C25  | 5332(2)     | 7500.0(17)  | 390.5(11)   | 34.3(6)  |
| C26  | 5663(2)     | 7415.4(17)  | 854.4(11)   | 33.4(6)  |
| C27  | 4539(2)     | 8818.1(17)  | 1736.6(11)  | 33.8(6)  |
| C28  | 5170(2)     | 9309(2)     | 2104.2(12)  | 41.9(7)  |
| C29  | 4980(3)     | 9591(2)     | 2578.3(13)  | 53.8(9)  |
| C30  | 4178(3)     | 9395(2)     | 2713.1(15)  | 56.9(10) |
| C31  | 3524(3)     | 8949(2)     | 2342.4(16)  | 54.7(9)  |
| C32  | 3695(2)     | 8675(2)     | 1856.3(13)  | 43.5(7)  |
| C33  | 4069(4)     | 9653(3)     | 3268.5(17)  | 72.8(13) |
| C34  | 3221(3)     | 9240(3)     | 3364.6(17)  | 69.1(12) |
| C35  | 4849(4)     | 9478(4)     | 3588.5(17)  | 81.2(15) |
| C36  | 4064(4)     | 10477(3)    | 3426.1(18)  | 80.9(15) |
| C37  | 3832(2)     | 8985.6(18)  | 760.5(11)   | 34.6(6)  |
| C38  | 4066(2)     | 9752.2(19)  | 966.8(12)   | 40.9(7)  |
| C39  | 3517(2)     | 10252.0(19) | 869.7(14)   | 44.2(7)  |
| C40  | 2711(2)     | 10014.4(19) | 565.0(12)   | 37.8(7)  |
| C41  | 2455(2)     | 9245.0(19)  | 385.6(12)   | 39.3(7)  |
| C42  | 3004(2)     | 8740.0(19)  | 481.9(12)   | 38.8(7)  |
| C43  | 2166(2)     | 10568(2)    | 401.5(14)   | 44.3(7)  |
| C44  | 2277(3)     | 11319(2)    | 795.4(17)   | 58.9(10) |
| C45  | 1171(3)     | 10268(3)    | 268(2)      | 68.9(13) |
| C46  | 2502(3)     | 10678(3)    | -71.1(16)   | 56.3(9)  |
| C47  | 4403(2)     | 8119.0(18)  | -120.4(11)  | 36.6(6)  |
| C48  | 4621(2)     | 8794.6(19)  | -226.7(12)  | 39.2(7)  |
| C49  | 4280(3)     | 8895(2)     | -669.7(12)  | 45.3(8)  |
| C50  | 3698(3)     | 8342(2)     | -1023.8(13) | 47.3(8)  |
| C51  | 3496(3)     | 7668(2)     | -916.7(13)  | 50.2(8)  |
| C52  | 3838(2)     | 7558(2)     | -474.9(13)  | 44.1(7)  |
| C53  | 3368(4)     | 8469(2)     | -1516.9(14) | 61.4(11) |
| C54  | 3070(4)     | 9237(3)     | -1435.7(18) | 76.4(15) |

| Atom | x         | y          | z           | $U_{eq}$ |
|------|-----------|------------|-------------|----------|
| C55  | 2598(4)   | 7878(3)    | -1804.6(17) | 77.4(15) |
| C56  | 4124(4)   | 8427(3)    | -1832.2(15) | 74.2(14) |
| C57  | 5564(2)   | 7007.1(18) | -77.7(11)   | 35.5(6)  |
| C58  | 6004(3)   | 7303.2(19) | -401.4(13)  | 45.7(8)  |
| C59  | 6140(3)   | 6858(2)    | -858.3(13)  | 45.4(8)  |
| C60  | 5839(2)   | 6092.4(18) | -1013.1(12) | 39.4(7)  |
| C61  | 5426(2)   | 5791.4(19) | -681.2(12)  | 41.7(7)  |
| C62  | 5293(2)   | 6242.1(18) | -223.1(11)  | 38.2(7)  |
| C63  | 5916(3)   | 5626(2)    | -1540.0(13) | 47.4(8)  |
| C64  | 5769(3)   | 4787(2)    | -1604.6(15) | 59.2(10) |
| C65  | 5211(4)   | 5810(3)    | -1894.4(16) | 69.9(12) |
| C66  | 6844(3)   | 5818(3)    | -1676.7(16) | 62.3(11) |
| C67  | 6272(2)   | 6862.3(18) | 887.7(11)   | 35.6(6)  |
| C68  | 7135(2)   | 6948(2)    | 780.3(12)   | 41.6(7)  |
| C69  | 7713(2)   | 6456(2)    | 852.7(12)   | 46.2(8)  |
| C70  | 7452(3)   | 5854(2)    | 1024.1(12)  | 44.4(8)  |
| C71  | 6571(3)   | 5755(2)    | 1115.3(13)  | 46.3(8)  |
| C72  | 5995(2)   | 6247.2(19) | 1048.8(13)  | 42.2(7)  |
| C73  | 8067(3)   | 5304(3)    | 1120.2(15)  | 59.5(11) |
| C74  | 9010(4)   | 5536(4)    | 1035(2)     | 90.2(19) |
| C75  | 7746(6)   | 4536(4)    | 775(3)      | 117(3)   |
| C76  | 8112(4)   | 5319(4)    | 1664.4(19)  | 76.2(15) |
| C77  | 8613(2)   | 7745.1(18) | 3481.4(11)  | 35.0(6)  |
| C78  | 9074(2)   | 8478.9(18) | 3614.6(11)  | 35.9(6)  |
| C79  | 9925(2)   | 8639.5(18) | 3887.7(11)  | 35.9(6)  |
| C80  | 10322(2)  | 8067(2)    | 4020.5(11)  | 39.8(7)  |
| C81  | 9834(2)   | 7348.2(19) | 3918.6(11)  | 37.8(7)  |
| C82  | 8979(2)   | 7185.9(18) | 3650.0(11)  | 36.9(6)  |
| C83  | 8467(2)   | 6423.2(19) | 3540.9(12)  | 39.5(7)  |
| C84  | 8213(3)   | 5968(2)    | 3062.6(13)  | 54.0(9)  |
| C85  | 7732(5)   | 5263(3)    | 2966.2(16)  | 78.1(16) |
| C86  | 7472(5)   | 4991(3)    | 3350.1(18)  | 89(2)    |
| C87  | 7734(4)   | 5453(3)    | 3831.3(16)  | 74.2(15) |
| C88  | 8222(3)   | 6143(2)    | 3922.9(13)  | 49.4(8)  |
| C89  | 6895(8)   | 4228(4)    | 3257(3)     | 134(4)   |
| C90  | 5828(7)   | 4432(6)    | 3376(5)     | 172(6)   |
| C91  | 6646(5)   | 3828(3)    | 2752(3)     | 99(2)    |
| C92  | 7147(8)   | 3831(4)    | 3617(3)     | 151(5)   |
| C93  | 10244(2)  | 6767(2)    | 4101.9(13)  | 44.3(7)  |
| C94  | 10421(3)  | 6116(3)    | 3780.8(18)  | 60.9(10) |
| C95  | 10991(7)  | 5665(6)    | 3884(3)     | 64.5(15) |
| C96  | 11322(7)  | 5787(6)    | 4380(4)     | 69.1(18) |
| C97  | 11053(8)  | 6346(6)    | 4717(4)     | 64.5(15) |
| C98  | 10496(3)  | 6886(3)    | 4602.9(15)  | 59.0(10) |
| C99  | 12023(9)  | 5320(7)    | 4540(4)     | 100(3)   |
| C100 | 12619(15) | 5768(12)   | 4975(7)     | 167(5)   |
| C101 | 12382(16) | 4864(13)   | 4115(6)     | 167(5)   |
| C102 | 11621(15) | 4813(15)   | 4795(10)    | 167(5)   |
| C103 | 11260(2)  | 8197(2)    | 4250.7(12)  | 41.9(7)  |
| C104 | 11565(3)  | 8687(2)    | 4720.7(13)  | 49.5(8)  |
| C105 | 12440(3)  | 8777(3)    | 4917.9(14)  | 57.6(10) |
| C106 | 13057(3)  | 8399(3)    | 4662.5(16)  | 61.5(11) |
| C107 | 12759(3)  | 7921(3)    | 4189.3(16)  | 60.0(11) |
| C108 | 11875(2)  | 7828(2)    | 3988.6(13)  | 49.1(8)  |
| C109 | 14634(4)  | 8253(8)    | 4534(3)     | 171(6)   |
| C110 | 14354(6)  | 9318(8)    | 5120(7)     | 245(10)  |
| C111 | 14076(7)  | 8134(14)   | 5291(7)     | 289(13)  |
| C112 | 14017(4)  | 8467(5)    | 4895(2)     | 97(2)    |
| C113 | 10401(2)  | 9421.9(19) | 4050.8(11)  | 36.9(6)  |
| C114 | 11190(2)  | 9611(2)    | 3880.6(13)  | 46.2(8)  |
| C115 | 11660(2)  | 10319(2)   | 4063.5(13)  | 47.6(8)  |

| Atom | x         | y          | z           | $U_{eq}$ |
|------|-----------|------------|-------------|----------|
| C116 | 11377(2)  | 10876(2)   | 4426.6(12)  | 42.4(7)  |
| C117 | 10568(2)  | 10694(2)   | 4579.3(12)  | 42.6(7)  |
| C118 | 10087(2)  | 9981(2)    | 4393.6(11)  | 39.2(7)  |
| C119 | 11914(3)  | 11656(2)   | 4663.2(15)  | 55.5(10) |
| C120 | 11370(4)  | 12254(3)   | 4577(2)     | 83.2(15) |
| C121 | 12774(4)  | 11737(3)   | 4442(2)     | 78.6(15) |
| C122 | 12137(5)  | 11780(3)   | 5217.3(18)  | 90.4(19) |
| C123 | 8683(2)   | 9103.6(18) | 3478.8(12)  | 38.5(7)  |
| C124 | 9085(3)   | 9473(2)    | 3175.6(13)  | 47.3(8)  |
| C125 | 8811(3)   | 10125(2)   | 3112.8(16)  | 60.8(11) |
| C126 | 8127(3)   | 10438(2)   | 3344.1(17)  | 61.2(11) |
| C127 | 7693(3)   | 10043(2)   | 3622.9(16)  | 54.5(9)  |
| C128 | 7961(2)   | 9385(2)    | 3686.9(13)  | 44.2(7)  |
| C129 | 7896(4)   | 11210(3)   | 3328(2)     | 81.6(17) |
| C130 | 6948(6)   | 11171(4)   | 3162(4)     | 139(4)   |
| C131 | 8383(8)   | 11468(4)   | 2924(3)     | 137(4)   |
| C132 | 8256(6)   | 11767(3)   | 3809(3)     | 119(3)   |
| C133 | 5519(3)   | 6661(3)    | 3299.0(16)  | 58.2(10) |
| C134 | 10824(8)  | 5699(6)    | 4548(4)     | 69.1(18) |
| C135 | 10723(16) | 4343(11)   | 4489(8)     | 167(5)   |
| C136 | 5214(5)   | 6286(4)    | 4010(2)     | 89.7(18) |
| C137 | 11150(9)  | 5086(9)    | 4791(5)     | 100(3)   |
| C138 | 5683(4)   | 6411(4)    | 4536(2)     | 81.8(14) |
| C139 | 5385(6)   | 5833(4)    | 4783(3)     | 106(2)   |
| C140 | 5788(6)   | 6034(6)    | 5293(3)     | 113(2)   |
| C141 | 5456(4)   | 6644(4)    | 5647(2)     | 86.4(16) |
| C142 | 5899(7)   | 6834(6)    | 6176(2)     | 132(2)   |
| C143 | 5560(20)  | 7461(13)   | 6488(5)     | 132(2)   |
| C144 | 5891(16)  | 7978(12)   | 7058(5)     | 132(2)   |
| C145 | 5868(13)  | 7540(10)   | 7425(5)     | 110(4)   |
| C146 | 6393(7)   | 7949(6)    | 7933(3)     | 127(3)   |
| C147 | 4317(2)   | 7270.6(19) | 2715.6(12)  | 40.0(7)  |
| C148 | 6011(11)  | 8034(8)    | 7448(4)     | 110(4)   |
| C149 | 10742(9)  | 6384(6)    | 4834(4)     | 64.5(15) |
| C150 | 2808(3)   | 6874(3)    | 2666.3(17)  | 61.5(11) |
| C151 | 2117(3)   | 6298(3)    | 2325.7(17)  | 61.5(11) |
| C152 | 1299(3)   | 6162(2)    | 2565.4(16)  | 55.6(9)  |
| C153 | 603(3)    | 5544(3)    | 2262(2)     | 68.8(12) |
| C154 | 876(4)    | 4778(3)    | 2102(3)     | 82.8(16) |
| C155 | 200(3)    | 4147(3)    | 1823(2)     | 77.2(14) |
| C156 | 463(4)    | 3364(3)    | 1680(3)     | 88.1(16) |
| C157 | -208(5)   | 2754(3)    | 1418(3)     | 95.4(19) |
| C158 | 15(6)     | 1974(3)    | 1302(3)     | 104(2)   |
| C159 | -621(7)   | 1359(4)    | 1005(5)     | 145(4)   |
| C160 | 10432(3)  | 8005(3)    | 1550.5(16)  | 54.4(9)  |
| C161 | 10688(8)  | 5565(7)    | 4045(4)     | 64.5(15) |
| C162 | 10928(18) | 5214(15)   | 5302(7)     | 167(5)   |
| C163 | 10772(3)  | 7903(3)    | 738.6(16)   | 60.5(10) |
| C164 | 10322(3)  | 8007(3)    | 266.6(19)   | 67.7(12) |
| C165 | 9480(3)   | 7454(3)    | 26.5(17)    | 64.7(11) |
| C166 | 9614(3)   | 6655(3)    | -106.4(19)  | 66.4(11) |
| C167 | 8783(3)   | 6113(3)    | -379.8(18)  | 61.4(10) |
| C168 | 8932(3)   | 5303(3)    | -500.2(18)  | 63.5(11) |
| C169 | 8117(3)   | 4749(3)    | -732.6(17)  | 60.6(10) |
| C170 | 8260(3)   | 3942(3)    | -813.8(18)  | 63.2(11) |
| C171 | 7426(3)   | 3394(3)    | -1020.5(17) | 61.8(10) |
| C172 | 6759(4)   | 3434(3)    | -660.0(18)  | 73.8(14) |
| C173 | 9504(3)   | 9264(3)    | 1339.2(19)  | 61.0(11) |
| C174 | 5622(16)  | 7397(12)   | 6555(4)     | 132(2)   |
| C175 | 12108(13) | 5113(19)   | 4831(12)    | 167(5)   |
| C176 | 11000(11) | 9867(10)   | 1562(6)     | 209(2)   |

| Atom | x         | y         | z       | $U_{eq}$ |
|------|-----------|-----------|---------|----------|
| C177 | 11732(11) | 9949(10)  | 1937(6) | 209(2)   |
| C178 | 11500(11) | 10394(10) | 2503(6) | 209(2)   |
| C179 | 11302(11) | 11134(10) | 2498(6) | 209(2)   |
| C180 | 11334(11) | 11666(10) | 3022(6) | 209(2)   |
| C181 | 10961(11) | 12502(10) | 3140(6) | 209(2)   |
| C182 | 11821(11) | 12969(10) | 2977(6) | 209(2)   |
| C183 | 12092(11) | 13757(10) | 3195(6) | 209(2)   |
| C184 | 12528(11) | 14310(10) | 3068(6) | 209(2)   |
| C185 | 13196(11) | 14858(10) | 3183(6) | 209(2)   |
| C186 | 6154(13)  | 7356(9)   | 7059(4) | 132(2)   |

**Table 9:** Anisotropic Displacement Parameters ( $\times 10^4$ ) for **20Hir\_CD02\_2**. The anisotropic displacement factor exponent takes the form:  $-2\pi^2[h^2a^{*2} \times U_{11} + \dots + 2hka^* \times b^* \times U_{12}]$

| Atom | $U_{11}$ | $U_{22}$ | $U_{33}$ | $U_{23}$ | $U_{13}$ | $U_{12}$  |
|------|----------|----------|----------|----------|----------|-----------|
| O134 | 52.5(15) | 56.2(16) | 76.9(18) | 33.4(15) | 2.1(13)  | -10.7(13) |
| O135 | 66.3(19) | 124(3)   | 60.0(17) | 54(2)    | -0.4(15) | -29.8(19) |
| O148 | 51.0(14) | 61.9(16) | 42.1(13) | 11.9(11) | 14.7(10) | 1.6(12)   |
| O149 | 37.0(12) | 48.3(14) | 48.9(13) | 7.9(11)  | 10.1(10) | 0.7(10)   |
| O161 | 40.6(14) | 88(2)    | 68.8(17) | 43.9(16) | 17.0(12) | 21.1(13)  |
| O162 | 56.4(16) | 64.0(17) | 55.2(15) | 21.4(13) | 15.6(12) | 8.3(13)   |
| O174 | 48.4(14) | 66.0(17) | 71.3(17) | 48.1(15) | 12.9(12) | 8.0(12)   |
| O175 | 54.2(16) | 55.6(17) | 84(2)    | 24.7(15) | 7.9(15)  | -2.1(13)  |
| C1   | 41.0(16) | 40.4(17) | 38.7(15) | 20.5(13) | 4.8(12)  | 13.1(13)  |
| C2   | 37.3(16) | 48.0(19) | 49.1(17) | 24.0(15) | 7.8(13)  | 16.6(13)  |
| C3   | 37.8(16) | 50.1(19) | 45.5(17) | 25.2(15) | 7.6(13)  | 12.9(14)  |
| C4   | 36.1(15) | 33.9(15) | 34.5(14) | 13.7(12) | 3.2(11)  | 6.4(11)   |
| C5   | 38.3(16) | 40.1(17) | 41.9(15) | 20.9(13) | 7.4(12)  | 5.8(12)   |
| C6   | 40.0(16) | 35.7(16) | 41.6(15) | 20.8(13) | 5.8(12)  | 9.1(12)   |
| C7   | 34.9(14) | 34.0(15) | 34.9(14) | 14.3(12) | 2.9(11)  | 9.0(11)   |
| C8   | 34.4(14) | 26.6(13) | 30.0(12) | 11.3(11) | 5.3(11)  | 7.5(10)   |
| C9   | 34.3(14) | 28.9(14) | 32.0(13) | 11.5(11) | 4.8(11)  | 8.6(11)   |
| C10  | 38.9(15) | 28.8(14) | 32.4(13) | 11.0(11) | 4.2(11)  | 6.8(11)   |
| C11  | 39.3(15) | 27.7(14) | 31.7(13) | 11.8(11) | 2.1(11)  | 5.5(11)   |
| C12  | 37.2(15) | 29.1(14) | 30.4(13) | 10.1(11) | 4.3(11)  | 6.0(11)   |
| C13  | 32.9(14) | 29.4(14) | 30.7(13) | 8.9(11)  | 4.2(11)  | 8.0(11)   |
| C14  | 35.5(14) | 30.3(14) | 30.4(13) | 9.0(11)  | 4.9(11)  | 7.0(11)   |
| C15  | 32.8(14) | 36.8(16) | 34.7(14) | 9.3(12)  | 4.4(11)  | 7.8(12)   |
| C16  | 36.0(15) | 32.0(15) | 35.1(14) | 8.3(12)  | 6.3(12)  | 3.7(11)   |
| C17  | 40.2(16) | 33.6(15) | 31.6(14) | 8.6(12)  | 3.7(12)  | 3.1(12)   |
| C18  | 42.8(17) | 42.8(17) | 39.1(15) | 19.6(14) | 6.4(13)  | 1.0(13)   |
| C19  | 45.3(17) | 43.0(17) | 33.8(14) | 18.5(13) | 2.0(13)  | 0.3(13)   |
| C20  | 39.1(15) | 32.4(15) | 33.6(14) | 13.6(12) | 3.5(12)  | 6.6(12)   |
| C21  | 34.4(14) | 34.5(15) | 32.6(14) | 11.5(12) | 2.0(11)  | 3.6(11)   |
| C22  | 35.0(14) | 31.9(15) | 33.0(14) | 9.3(11)  | 4.9(11)  | 4.9(11)   |
| C23  | 35.1(14) | 30.3(14) | 33.5(14) | 8.9(11)  | 4.1(11)  | 2.2(11)   |
| C24  | 39.0(15) | 30.0(14) | 30.4(13) | 9.8(11)  | 3.7(11)  | 3.0(11)   |
| C25  | 41.5(16) | 30.4(15) | 31.1(14) | 8.4(11)  | 6.5(12)  | 4.9(12)   |
| C26  | 34.4(14) | 32.6(15) | 35.4(14) | 12.6(12) | 5.9(11)  | 6.4(11)   |
| C27  | 36.0(15) | 33.9(15) | 33.7(14) | 10.5(12) | 5.1(11)  | 11.8(11)  |
| C28  | 41.9(17) | 43.8(18) | 37.3(15) | 7.2(13)  | 6.0(13)  | 6.2(13)   |
| C29  | 63(2)    | 52(2)    | 37.3(17) | -1.1(15) | 8.8(16)  | 1.7(17)   |
| C30  | 70(3)    | 51(2)    | 47.0(19) | 3.1(16)  | 24.2(18) | 9.3(18)   |
| C31  | 53(2)    | 50(2)    | 62(2)    | 9.6(17)  | 25.8(18) | 9.9(16)   |
| C32  | 40.6(17) | 39.3(17) | 48.6(18) | 7.6(14)  | 9.5(14)  | 6.8(13)   |
| C33  | 78(3)    | 81(3)    | 53(2)    | 3(2)     | 27(2)    | 11(2)     |
| C34  | 73(3)    | 86(3)    | 56(2)    | 20(2)    | 33(2)    | 19(2)     |
| C35  | 92(4)    | 100(4)   | 46(2)    | 11(2)    | 12(2)    | 13(3)     |
| C36  | 85(3)    | 85(4)    | 55(2)    | -11(2)   | 21(2)    | 7(3)      |
| C37  | 35.1(15) | 35.2(16) | 35.1(14) | 12.3(12) | 4.7(11)  | 6.6(12)   |



| Atom | $U_{11}$ | $U_{22}$ | $U_{33}$ | $U_{23}$ | $U_{13}$ | $U_{12}$ |
|------|----------|----------|----------|----------|----------|----------|
| C38  | 37.8(16) | 36.8(17) | 43.4(16) | 6.2(13)  | -2.5(13) | 6.4(13)  |
| C39  | 42.9(17) | 32.2(16) | 54.7(19) | 8.2(14)  | 2.0(14)  | 8.2(13)  |
| C40  | 36.2(15) | 39.9(17) | 41.8(15) | 18.4(13) | 4.6(12)  | 8.2(12)  |
| C41  | 31.6(14) | 42.0(17) | 45.6(16) | 17.3(14) | 0.2(12)  | 3.5(12)  |
| C42  | 39.0(16) | 34.2(16) | 42.7(16) | 13.0(13) | 0.5(13)  | 2.4(12)  |
| C43  | 40.0(17) | 43.5(18) | 56.1(19) | 25.5(15) | 2.8(14)  | 9.6(14)  |
| C44  | 67(3)    | 50(2)    | 68(2)    | 24.7(19) | 9(2)     | 27.7(19) |
| C45  | 39.2(19) | 71(3)    | 112(4)   | 53(3)    | -1(2)    | 16.9(18) |
| C46  | 65(2)    | 57(2)    | 58(2)    | 30.4(19) | 9.8(18)  | 16.5(18) |
| C47  | 46.5(17) | 34.9(16) | 30.6(14) | 11.2(12) | 6.1(12)  | 10.2(13) |
| C48  | 45.7(17) | 36.3(16) | 36.3(15) | 11.5(13) | 4.8(13)  | 7.0(13)  |
| C49  | 62(2)    | 40.5(18) | 37.1(16) | 16.7(14) | 8.1(15)  | 6.8(15)  |
| C50  | 63(2)    | 42.3(19) | 36.9(16) | 12.4(14) | 2.5(15)  | 9.5(16)  |
| C51  | 65(2)    | 41.2(19) | 38.3(16) | 7.3(14)  | -6.3(15) | 3.5(16)  |
| C52  | 54(2)    | 35.7(17) | 40.8(16) | 12.0(13) | 0.2(14)  | 3.3(14)  |
| C53  | 92(3)    | 52(2)    | 38.9(18) | 15.0(16) | -5.3(19) | 13(2)    |
| C54  | 116(4)   | 59(3)    | 54(2)    | 21(2)    | -15(3)   | 23(3)    |
| C55  | 102(4)   | 73(3)    | 51(2)    | 19(2)    | -22(2)   | 11(3)    |
| C56  | 111(4)   | 76(3)    | 39.3(19) | 22(2)    | 8(2)     | 18(3)    |
| C57  | 41.8(16) | 35.4(16) | 30.6(13) | 9.9(12)  | 7.3(12)  | 7.3(12)  |
| C58  | 63(2)    | 31.6(16) | 43.5(17) | 8.5(13)  | 19.0(15) | 3.5(14)  |
| C59  | 62(2)    | 38.4(17) | 39.8(16) | 11.8(14) | 21.0(15) | 8.0(15)  |
| C60  | 50.2(18) | 34.4(16) | 36.5(15) | 10.9(13) | 10.4(13) | 11.9(13) |
| C61  | 56.5(19) | 31.4(16) | 37.8(15) | 8.1(13)  | 11.1(14) | 8.4(13)  |
| C62  | 49.8(18) | 33.9(16) | 34.0(14) | 12.6(12) | 10.1(13) | 8.1(13)  |
| C63  | 61(2)    | 44.2(19) | 39.0(16) | 10.4(14) | 14.0(15) | 14.3(16) |
| C64  | 83(3)    | 44(2)    | 49(2)    | 3.9(16)  | 23.3(19) | 11.4(19) |
| C65  | 83(3)    | 82(3)    | 44(2)    | 15(2)    | 4(2)     | 23(3)    |
| C66  | 78(3)    | 55(2)    | 57(2)    | 9.1(18)  | 33(2)    | 17(2)    |
| C67  | 39.7(16) | 34.9(16) | 31.6(13) | 6.0(12)  | 6.9(12)  | 9.3(12)  |
| C68  | 47.0(18) | 41.1(17) | 39.6(15) | 11.8(13) | 11.4(13) | 12.3(14) |
| C69  | 45.3(18) | 54(2)    | 39.6(16) | 8.4(15)  | 10.1(14) | 19.9(15) |
| C70  | 53.9(19) | 47.1(19) | 34.8(15) | 9.4(14)  | 5.6(14)  | 24.5(15) |
| C71  | 57(2)    | 39.0(18) | 46.1(17) | 15.7(14) | 8.2(15)  | 11.4(15) |
| C72  | 45.7(17) | 37.4(17) | 46.1(17) | 14.3(14) | 8.1(14)  | 9.6(13)  |
| C73  | 69(3)    | 66(3)    | 48.9(19) | 14.8(18) | 5.5(18)  | 39(2)    |
| C74  | 83(4)    | 127(5)   | 90(4)    | 52(4)    | 35(3)    | 68(4)    |
| C75  | 149(7)   | 68(4)    | 112(5)   | -8(3)    | -32(5)   | 64(4)    |
| C76  | 85(3)    | 97(4)    | 67(3)    | 42(3)    | 18(2)    | 50(3)    |
| C77  | 40.3(16) | 36.5(16) | 30.7(13) | 14.9(12) | 2.5(12)  | 4.4(12)  |
| C78  | 40.6(16) | 38.4(16) | 32.4(13) | 16.3(12) | 4.9(12)  | 4.9(12)  |
| C79  | 36.9(15) | 39.8(17) | 32.9(14) | 12.5(12) | 5.2(12)  | 7.8(12)  |
| C80  | 43.4(17) | 45.4(18) | 31.8(14) | 11.8(13) | 2.9(12)  | 10.7(13) |
| C81  | 44.0(17) | 40.5(17) | 31.7(14) | 13.0(12) | 4.2(12)  | 11.5(13) |
| C82  | 44.1(16) | 38.0(16) | 31.3(13) | 13.6(12) | 5.1(12)  | 7.7(13)  |
| C83  | 48.8(18) | 35.8(16) | 36.8(15) | 15.5(13) | 2.5(13)  | 8.0(13)  |
| C84  | 83(3)    | 40.8(19) | 39.0(17) | 16.3(15) | 2.1(17)  | 5.6(18)  |
| C85  | 137(5)   | 47(2)    | 39.4(19) | 10.4(17) | -9(2)    | -9(3)    |
| C86  | 154(6)   | 47(3)    | 55(2)    | 19(2)    | -7(3)    | -29(3)   |
| C87  | 126(4)   | 48(2)    | 46(2)    | 24.4(18) | 1(2)     | -14(2)   |
| C88  | 69(2)    | 41.4(19) | 38.5(16) | 17.2(14) | 0.0(16)  | 3.9(16)  |
| C89  | 232(11)  | 66(4)    | 81(4)    | 25(3)    | -15(5)   | -63(5)   |
| C90  | 130(8)   | 120(7)   | 223(12)  | -25(7)   | 80(8)    | -36(6)   |
| C91  | 112(5)   | 61(3)    | 107(4)   | 18(3)    | -5(4)    | -24(3)   |
| C92  | 237(11)  | 63(4)    | 140(7)   | 60(4)    | -42(7)   | -54(5)   |
| C93  | 44.6(18) | 49(2)    | 45.8(17) | 22.1(15) | 5.3(14)  | 14.3(15) |
| C94  | 63(2)    | 54(2)    | 67(2)    | 16.0(19) | 2(2)     | 23.2(19) |
| C95  | 86(5)    | 74(3)    | 47(3)    | 27(2)    | 12(2)    | 45(3)    |
| C96  | 73(5)    | 74(4)    | 80(5)    | 45(4)    | 13(3)    | 35(4)    |
| C97  | 86(5)    | 74(3)    | 47(3)    | 27(2)    | 12(2)    | 45(3)    |
| C98  | 64(2)    | 71(3)    | 49(2)    | 29.5(19) | -1.2(18) | 17(2)    |

| Atom | $U_{11}$ | $U_{22}$ | $U_{33}$ | $U_{23}$ | $U_{13}$ | $U_{12}$ |
|------|----------|----------|----------|----------|----------|----------|
| C99  | 123(7)   | 109(7)   | 96(6)    | 51(5)    | 12(5)    | 75(6)    |
| C100 | 206(11)  | 189(11)  | 149(6)   | 87(7)    | 13(7)    | 134(10)  |
| C101 | 206(11)  | 189(11)  | 149(6)   | 87(7)    | 13(7)    | 134(10)  |
| C102 | 206(11)  | 189(11)  | 149(6)   | 87(7)    | 13(7)    | 134(10)  |
| C103 | 41.8(17) | 46.8(19) | 37.3(15) | 12.4(14) | -0.1(13) | 11.0(14) |
| C104 | 51(2)    | 57(2)    | 38.3(16) | 7.7(15)  | 1.7(14)  | 16.1(16) |
| C105 | 55(2)    | 67(3)    | 42.2(18) | 3.8(17)  | -6.5(16) | 13.4(18) |
| C106 | 49(2)    | 74(3)    | 56(2)    | 9(2)     | -4.0(18) | 18.4(19) |
| C107 | 43(2)    | 79(3)    | 54(2)    | 7(2)     | 2.3(16)  | 22.0(19) |
| C108 | 45.2(19) | 58(2)    | 41.5(17) | 7.7(16)  | 3.6(14)  | 15.7(16) |
| C109 | 49(3)    | 308(16)  | 117(6)   | -12(7)   | -7(3)    | 57(6)    |
| C110 | 70(5)    | 219(14)  | 318(19)  | -101(13) | -76(8)   | 18(6)    |
| C111 | 90(7)    | 580(40)  | 320(20)  | 340(30)  | -16(9)   | 63(13)   |
| C112 | 59(3)    | 138(6)   | 74(3)    | 2(3)     | -17(3)   | 34(3)    |
| C113 | 36.2(15) | 40.0(17) | 34.8(14) | 12.4(12) | 2.4(12)  | 4.2(12)  |
| C114 | 45.7(18) | 46.9(19) | 43.3(17) | 5.5(14)  | 15.9(14) | 3.9(14)  |
| C115 | 44.1(18) | 50(2)    | 44.8(17) | 7.3(15)  | 13.0(14) | 0.1(15)  |
| C116 | 47.6(18) | 40.2(17) | 38.3(15) | 9.7(13)  | 9.8(13)  | 1.8(14)  |
| C117 | 49.2(18) | 41.5(18) | 38.9(15) | 10.8(13) | 13.4(14) | 8.7(14)  |
| C118 | 40.1(16) | 45.4(18) | 35.1(14) | 14.5(13) | 9.1(12)  | 7.1(13)  |
| C119 | 62(2)    | 48(2)    | 49.1(19) | 4.2(16)  | 16.9(17) | -6.8(17) |
| C120 | 102(4)   | 47(3)    | 102(4)   | 21(3)    | 29(3)    | 4(2)     |
| C121 | 78(3)    | 63(3)    | 78(3)    | -4(2)    | 27(2)    | -21(2)   |
| C122 | 123(5)   | 74(3)    | 51(2)    | 1(2)     | -1(3)    | -31(3)   |
| C123 | 42.2(16) | 36.1(16) | 38.7(15) | 17.4(13) | -2.4(12) | 1.1(12)  |
| C124 | 49.7(19) | 52(2)    | 43.1(17) | 24.4(15) | -0.5(14) | -3.4(15) |
| C125 | 71(3)    | 54(2)    | 59(2)    | 36.1(19) | -13(2)   | -12(2)   |
| C126 | 72(3)    | 41(2)    | 69(2)    | 26.4(19) | -20(2)   | 1.5(18)  |
| C127 | 57(2)    | 45(2)    | 63(2)    | 21.7(18) | -5.1(18) | 13.3(16) |
| C128 | 46.5(18) | 42.0(18) | 48.5(17) | 21.3(15) | 1.4(14)  | 8.6(14)  |
| C129 | 99(4)    | 48(2)    | 94(4)    | 34(2)    | -33(3)   | 3(2)     |
| C130 | 157(8)   | 68(4)    | 180(8)   | 49(5)    | -71(7)   | 25(4)    |
| C131 | 247(11)  | 68(4)    | 110(5)   | 60(4)    | -8(6)    | 22(5)    |
| C132 | 183(8)   | 41(3)    | 114(5)   | 18(3)    | -57(5)   | 20(3)    |
| C133 | 50(2)    | 75(3)    | 58(2)    | 41(2)    | 1.2(17)  | -5.4(19) |
| C134 | 73(5)    | 74(4)    | 80(5)    | 45(4)    | 13(3)    | 35(4)    |
| C135 | 206(11)  | 189(11)  | 149(6)   | 87(7)    | 13(7)    | 134(10)  |
| C136 | 101(4)   | 100(4)   | 77(3)    | 51(3)    | 10(3)    | -18(3)   |
| C137 | 123(7)   | 109(7)   | 96(6)    | 51(5)    | 12(5)    | 75(6)    |
| C138 | 77(3)    | 88(4)    | 81(3)    | 26(3)    | 6(3)     | 14(3)    |
| C139 | 139(6)   | 101(5)   | 104(5)   | 57(4)    | 51(4)    | 28(4)    |
| C140 | 109(5)   | 140(7)   | 107(5)   | 48(5)    | 26(4)    | 47(5)    |
| C141 | 91(4)    | 102(4)   | 71(3)    | 36(3)    | 8(3)     | 6(3)     |
| C142 | 173(5)   | 153(5)   | 65(2)    | 47(3)    | 7(3)     | -39(4)   |
| C143 | 173(5)   | 153(5)   | 65(2)    | 47(3)    | 7(3)     | -39(4)   |
| C144 | 173(5)   | 153(5)   | 65(2)    | 47(3)    | 7(3)     | -39(4)   |
| C145 | 146(9)   | 95(8)    | 85(5)    | 24(7)    | 32(6)    | -12(8)   |
| C146 | 147(7)   | 146(8)   | 82(4)    | 39(5)    | 10(4)    | -11(6)   |
| C147 | 40.5(17) | 41.5(17) | 40.3(16) | 15.8(13) | 7.4(13)  | 3.6(13)  |
| C148 | 146(9)   | 95(8)    | 85(5)    | 24(7)    | 32(6)    | -12(8)   |
| C149 | 86(5)    | 74(3)    | 47(3)    | 27(2)    | 12(2)    | 45(3)    |
| C150 | 48(2)    | 64(3)    | 67(2)    | 8(2)     | 22.2(18) | -2.0(18) |
| C151 | 50(2)    | 69(3)    | 59(2)    | 12(2)    | 9.0(18)  | -7.8(19) |
| C152 | 46(2)    | 57(2)    | 65(2)    | 20.1(19) | 11.5(17) | 1.9(16)  |
| C153 | 49(2)    | 66(3)    | 86(3)    | 16(2)    | 9(2)     | -2.1(19) |
| C154 | 60(3)    | 60(3)    | 121(5)   | 19(3)    | 1(3)     | 3(2)     |
| C155 | 57(3)    | 60(3)    | 109(4)   | 21(3)    | -3(3)    | 6(2)     |
| C156 | 81(4)    | 63(3)    | 120(5)   | 29(3)    | 10(3)    | 10(3)    |
| C157 | 93(4)    | 59(3)    | 126(5)   | 11(3)    | 15(4)    | 13(3)    |
| C158 | 135(6)   | 57(3)    | 121(5)   | 18(3)    | 32(5)    | 17(3)    |
| C159 | 141(7)   | 65(4)    | 199(10)  | -11(5)   | 11(7)    | 26(4)    |

| Atom | $U_{11}$ | $U_{22}$ | $U_{33}$ | $U_{23}$ | $U_{13}$ | $U_{12}$ |
|------|----------|----------|----------|----------|----------|----------|
| C160 | 50(2)    | 61(2)    | 64(2)    | 33.8(19) | 10.3(17) | 14.0(17) |
| C161 | 86(5)    | 74(3)    | 47(3)    | 27(2)    | 12(2)    | 45(3)    |
| C162 | 206(11)  | 189(11)  | 149(6)   | 87(7)    | 13(7)    | 134(10)  |
| C163 | 55(2)    | 67(3)    | 61(2)    | 19(2)    | 20.0(18) | 1.5(19)  |
| C164 | 70(3)    | 65(3)    | 73(3)    | 27(2)    | 21(2)    | -1(2)    |
| C165 | 67(3)    | 69(3)    | 60(2)    | 25(2)    | 9(2)     | 4(2)     |
| C166 | 61(3)    | 73(3)    | 74(3)    | 34(2)    | 17(2)    | 7(2)     |
| C167 | 63(2)    | 57(2)    | 66(2)    | 21(2)    | 14(2)    | 2.7(19)  |
| C168 | 62(2)    | 61(3)    | 65(2)    | 15(2)    | 11(2)    | 2(2)     |
| C169 | 61(2)    | 58(2)    | 62(2)    | 19.0(19) | 4.3(19)  | 0.6(19)  |
| C170 | 58(2)    | 62(3)    | 65(2)    | 10(2)    | 6.6(19)  | 7.7(19)  |
| C171 | 64(2)    | 54(2)    | 62(2)    | 11.5(19) | 0.9(19)  | 4.2(19)  |
| C172 | 82(3)    | 71(3)    | 58(2)    | 15(2)    | 6(2)     | -23(2)   |
| C173 | 50(2)    | 67(3)    | 86(3)    | 47(2)    | 21(2)    | 18.8(19) |
| C174 | 173(5)   | 153(5)   | 65(2)    | 47(3)    | 7(3)     | -39(4)   |
| C175 | 206(11)  | 189(11)  | 149(6)   | 87(7)    | 13(7)    | 134(10)  |
| C176 | 195(4)   | 221(5)   | 207(4)   | 114(4)   | -37(4)   | -64(4)   |
| C177 | 195(4)   | 221(5)   | 207(4)   | 114(4)   | -37(4)   | -64(4)   |
| C178 | 195(4)   | 221(5)   | 207(4)   | 114(4)   | -37(4)   | -64(4)   |
| C179 | 195(4)   | 221(5)   | 207(4)   | 114(4)   | -37(4)   | -64(4)   |
| C180 | 195(4)   | 221(5)   | 207(4)   | 114(4)   | -37(4)   | -64(4)   |
| C181 | 195(4)   | 221(5)   | 207(4)   | 114(4)   | -37(4)   | -64(4)   |
| C182 | 195(4)   | 221(5)   | 207(4)   | 114(4)   | -37(4)   | -64(4)   |
| C183 | 195(4)   | 221(5)   | 207(4)   | 114(4)   | -37(4)   | -64(4)   |
| C184 | 195(4)   | 221(5)   | 207(4)   | 114(4)   | -37(4)   | -64(4)   |
| C185 | 195(4)   | 221(5)   | 207(4)   | 114(4)   | -37(4)   | -64(4)   |
| C186 | 173(5)   | 153(5)   | 65(2)    | 47(3)    | 7(3)     | -39(4)   |

**Table 10:** Bond Lengths in Å for 20Hir\_CD02\_2.

| Atom | Atom | Length/Å  | Atom | Atom | Length/Å |
|------|------|-----------|------|------|----------|
| O134 | C133 | 1.210(5)  | C12  | C13  | 1.448(4) |
| O135 | C133 | 1.352(5)  | C12  | C17  | 1.426(4) |
| O135 | C136 | 1.425(6)  | C13  | C14  | 1.399(4) |
| O148 | C147 | 1.208(4)  | C14  | C15  | 1.405(4) |
| O149 | C147 | 1.334(4)  | C14  | C21  | 1.511(4) |
| O149 | C150 | 1.457(4)  | C15  | C16  | 1.365(4) |
| O161 | C160 | 1.219(5)  | C16  | C17  | 1.425(5) |
| O162 | C160 | 1.352(5)  | C16  | C147 | 1.494(4) |
| O162 | C163 | 1.451(5)  | C17  | C18  | 1.428(4) |
| O174 | C173 | 1.192(5)  | C18  | C19  | 1.369(5) |
| O175 | C173 | 1.369(6)  | C18  | C133 | 1.488(5) |
| O175 | C176 | 1.459(14) | C19  | C20  | 1.398(4) |
| C1   | C2   | 1.389(5)  | C20  | C77  | 1.489(4) |
| C1   | C10  | 1.394(4)  | C21  | C22  | 1.402(4) |
| C2   | C3   | 1.376(5)  | C21  | C26  | 1.406(4) |
| C3   | C4   | 1.437(4)  | C22  | C23  | 1.410(4) |
| C3   | C160 | 1.498(5)  | C22  | C27  | 1.493(4) |
| C4   | C5   | 1.425(4)  | C23  | C24  | 1.413(4) |
| C4   | C9   | 1.426(4)  | C23  | C37  | 1.491(4) |
| C5   | C6   | 1.367(5)  | C24  | C25  | 1.395(4) |
| C5   | C173 | 1.499(5)  | C24  | C47  | 1.498(4) |
| C6   | C7   | 1.394(4)  | C25  | C26  | 1.415(4) |
| C7   | C8   | 1.392(4)  | C25  | C57  | 1.496(4) |
| C8   | C9   | 1.440(4)  | C26  | C67  | 1.483(4) |
| C8   | C13  | 1.468(4)  | C27  | C28  | 1.398(5) |
| C9   | C10  | 1.425(4)  | C27  | C32  | 1.391(5) |
| C10  | C11  | 1.466(4)  | C28  | C29  | 1.376(5) |
| C11  | C12  | 1.425(4)  | C29  | C30  | 1.368(6) |
| C11  | C20  | 1.406(4)  | C30  | C31  | 1.394(6) |

| Atom | Atom | Length/Å |
|------|------|----------|
| C30  | C33  | 1.547(6) |
| C31  | C32  | 1.395(5) |
| C33  | C34  | 1.532(7) |
| C33  | C35  | 1.544(8) |
| C33  | C36  | 1.488(8) |
| C37  | C38  | 1.390(5) |
| C37  | C42  | 1.387(5) |
| C38  | C39  | 1.386(5) |
| C39  | C40  | 1.390(5) |
| C40  | C41  | 1.392(5) |
| C40  | C43  | 1.535(4) |
| C41  | C42  | 1.394(5) |
| C43  | C44  | 1.522(6) |
| C43  | C45  | 1.542(6) |
| C43  | C46  | 1.539(5) |
| C47  | C48  | 1.396(5) |
| C47  | C52  | 1.387(5) |
| C48  | C49  | 1.378(5) |
| C49  | C50  | 1.392(5) |
| C50  | C51  | 1.390(6) |
| C50  | C53  | 1.525(5) |
| C51  | C52  | 1.383(5) |
| C53  | C54  | 1.521(7) |
| C53  | C55  | 1.527(7) |
| C53  | C56  | 1.530(8) |
| C57  | C58  | 1.389(5) |
| C57  | C62  | 1.386(5) |
| C58  | C59  | 1.386(5) |
| C59  | C60  | 1.396(5) |
| C60  | C61  | 1.392(5) |
| C60  | C63  | 1.535(4) |
| C61  | C62  | 1.391(5) |
| C63  | C64  | 1.524(6) |
| C63  | C65  | 1.530(6) |
| C63  | C66  | 1.546(6) |
| C67  | C68  | 1.391(5) |
| C67  | C72  | 1.394(5) |
| C68  | C69  | 1.385(5) |
| C69  | C70  | 1.385(6) |
| C70  | C71  | 1.404(6) |
| C70  | C73  | 1.528(5) |
| C71  | C72  | 1.378(5) |
| C73  | C74  | 1.529(8) |
| C73  | C75  | 1.504(8) |
| C73  | C76  | 1.528(6) |
| C77  | C78  | 1.413(5) |
| C77  | C82  | 1.409(4) |
| C78  | C79  | 1.406(5) |
| C78  | C123 | 1.492(4) |
| C79  | C80  | 1.406(5) |
| C79  | C113 | 1.497(5) |
| C80  | C81  | 1.412(5) |
| C80  | C103 | 1.485(5) |
| C81  | C82  | 1.407(5) |
| C81  | C93  | 1.496(5) |
| C82  | C83  | 1.495(5) |
| C83  | C84  | 1.382(5) |
| C83  | C88  | 1.392(5) |
| C84  | C85  | 1.388(6) |
| C85  | C86  | 1.397(7) |
| C86  | C87  | 1.394(7) |

| Atom | Atom | Length/Å  |
|------|------|-----------|
| C86  | C89  | 1.545(8)  |
| C87  | C88  | 1.371(6)  |
| C89  | C90  | 1.765(16) |
| C89  | C91  | 1.414(10) |
| C89  | C92  | 1.461(11) |
| C93  | C94  | 1.382(6)  |
| C93  | C98  | 1.382(5)  |
| C94  | C95  | 1.342(10) |
| C94  | C161 | 1.497(10) |
| C95  | C96  | 1.393(14) |
| C96  | C97  | 1.344(15) |
| C96  | C99  | 1.562(12) |
| C97  | C98  | 1.471(10) |
| C98  | C149 | 1.348(10) |
| C99  | C100 | 1.452(16) |
| C99  | C101 | 1.471(15) |
| C99  | C102 | 1.466(16) |
| C103 | C104 | 1.398(5)  |
| C103 | C108 | 1.386(5)  |
| C104 | C105 | 1.375(6)  |
| C105 | C106 | 1.388(6)  |
| C106 | C107 | 1.395(6)  |
| C106 | C112 | 1.527(7)  |
| C107 | C108 | 1.390(6)  |
| C109 | C112 | 1.469(10) |
| C110 | C112 | 1.558(16) |
| C111 | C112 | 1.424(14) |
| C113 | C114 | 1.396(5)  |
| C113 | C118 | 1.387(5)  |
| C114 | C115 | 1.379(5)  |
| C115 | C116 | 1.393(5)  |
| C116 | C117 | 1.396(5)  |
| C116 | C119 | 1.540(5)  |
| C117 | C118 | 1.393(5)  |
| C119 | C120 | 1.523(8)  |
| C119 | C121 | 1.528(6)  |
| C119 | C122 | 1.519(7)  |
| C123 | C124 | 1.393(5)  |
| C123 | C128 | 1.393(5)  |
| C124 | C125 | 1.383(6)  |
| C125 | C126 | 1.391(8)  |
| C126 | C127 | 1.394(7)  |
| C126 | C129 | 1.538(6)  |
| C127 | C128 | 1.391(5)  |
| C129 | C130 | 1.471(11) |
| C129 | C131 | 1.582(12) |
| C129 | C132 | 1.485(8)  |
| C134 | C137 | 1.592(14) |
| C134 | C149 | 1.345(13) |
| C134 | C161 | 1.367(15) |
| C135 | C137 | 1.466(16) |
| C136 | C138 | 1.532(8)  |
| C137 | C162 | 1.482(16) |
| C137 | C175 | 1.458(16) |
| C138 | C139 | 1.500(9)  |
| C139 | C140 | 1.444(11) |
| C140 | C141 | 1.476(11) |
| C141 | C142 | 1.511(8)  |
| C142 | C143 | 1.449(19) |
| C142 | C174 | 1.422(18) |
| C143 | C144 | 1.637(17) |

| Atom | Atom | Length/Å  | Atom | Atom | Length/Å  |
|------|------|-----------|------|------|-----------|
| C144 | C145 | 1.491(14) | C166 | C167 | 1.535(7)  |
| C145 | C146 | 1.530(13) | C167 | C168 | 1.512(7)  |
| C146 | C148 | 1.494(12) | C168 | C169 | 1.505(6)  |
| C148 | C186 | 1.493(14) | C169 | C170 | 1.512(7)  |
| C150 | C151 | 1.486(6)  | C170 | C171 | 1.511(6)  |
| C151 | C152 | 1.517(6)  | C171 | C172 | 1.511(7)  |
| C152 | C153 | 1.496(6)  | C174 | C186 | 1.595(16) |
| C153 | C154 | 1.502(8)  | C176 | C177 | 1.428(18) |
| C154 | C155 | 1.473(7)  | C177 | C178 | 1.69(2)   |
| C155 | C156 | 1.523(8)  | C178 | C179 | 1.45(2)   |
| C156 | C157 | 1.434(9)  | C179 | C180 | 1.54(2)   |
| C157 | C158 | 1.495(9)  | C180 | C181 | 1.69(3)   |
| C158 | C159 | 1.436(12) | C181 | C182 | 1.681(19) |
| C163 | C164 | 1.511(7)  | C182 | C183 | 1.44(2)   |
| C164 | C165 | 1.538(7)  | C183 | C184 | 1.327(17) |
| C165 | C166 | 1.486(7)  | C184 | C185 | 1.320(17) |

**Table 11:** Bond Angles in ° for 20Hir\_CD02\_2.

| Atom | Atom | Atom | Angle/°  | Atom | Atom | Atom | Angle/°  |
|------|------|------|----------|------|------|------|----------|
| C133 | O135 | C136 | 117.9(4) | C15  | C16  | C147 | 118.7(3) |
| C147 | O149 | C150 | 113.5(3) | C17  | C16  | C147 | 120.9(3) |
| C160 | O162 | C163 | 115.5(3) | C12  | C17  | C18  | 117.9(3) |
| C173 | O175 | C176 | 115.5(6) | C16  | C17  | C12  | 118.5(3) |
| C2   | C1   | C10  | 121.6(3) | C16  | C17  | C18  | 123.6(3) |
| C3   | C2   | C1   | 121.6(3) | C17  | C18  | C133 | 122.5(3) |
| C2   | C3   | C4   | 119.3(3) | C19  | C18  | C17  | 119.2(3) |
| C2   | C3   | C160 | 114.8(3) | C19  | C18  | C133 | 117.8(3) |
| C4   | C3   | C160 | 124.8(3) | C18  | C19  | C20  | 122.9(3) |
| C5   | C4   | C3   | 124.2(3) | C11  | C20  | C77  | 124.2(3) |
| C5   | C4   | C9   | 118.1(3) | C19  | C20  | C11  | 118.6(3) |
| C9   | C4   | C3   | 117.7(3) | C19  | C20  | C77  | 117.2(3) |
| C4   | C5   | C173 | 124.4(3) | C22  | C21  | C14  | 118.9(3) |
| C6   | C5   | C4   | 119.6(3) | C22  | C21  | C26  | 121.1(3) |
| C6   | C5   | C173 | 115.1(3) | C26  | C21  | C14  | 119.7(3) |
| C5   | C6   | C7   | 122.3(3) | C21  | C22  | C23  | 119.7(3) |
| C8   | C7   | C6   | 120.8(3) | C21  | C22  | C27  | 118.5(3) |
| C7   | C8   | C9   | 117.7(3) | C23  | C22  | C27  | 121.8(3) |
| C7   | C8   | C13  | 123.5(3) | C22  | C23  | C24  | 119.2(3) |
| C9   | C8   | C13  | 118.8(2) | C22  | C23  | C37  | 121.4(3) |
| C4   | C9   | C8   | 120.3(3) | C24  | C23  | C37  | 119.3(3) |
| C10  | C9   | C4   | 120.8(3) | C23  | C24  | C47  | 118.5(3) |
| C10  | C9   | C8   | 118.9(3) | C25  | C24  | C23  | 120.9(3) |
| C1   | C10  | C9   | 117.5(3) | C25  | C24  | C47  | 120.5(3) |
| C1   | C10  | C11  | 123.2(3) | C24  | C25  | C26  | 119.9(3) |
| C9   | C10  | C11  | 119.3(3) | C24  | C25  | C57  | 119.8(3) |
| C12  | C11  | C10  | 118.5(3) | C26  | C25  | C57  | 120.2(3) |
| C20  | C11  | C10  | 122.6(3) | C21  | C26  | C25  | 119.1(3) |
| C20  | C11  | C12  | 118.9(3) | C21  | C26  | C67  | 120.0(3) |
| C11  | C12  | C13  | 119.3(3) | C25  | C26  | C67  | 120.9(3) |
| C11  | C12  | C17  | 120.4(3) | C28  | C27  | C22  | 120.3(3) |
| C17  | C12  | C13  | 120.4(3) | C32  | C27  | C22  | 121.4(3) |
| C12  | C13  | C8   | 118.2(3) | C32  | C27  | C28  | 117.6(3) |
| C14  | C13  | C8   | 123.8(3) | C29  | C28  | C27  | 121.0(3) |
| C14  | C13  | C12  | 118.0(3) | C30  | C29  | C28  | 121.8(4) |
| C13  | C14  | C15  | 119.6(3) | C29  | C30  | C31  | 117.7(3) |
| C13  | C14  | C21  | 125.8(3) | C29  | C30  | C33  | 118.1(4) |
| C15  | C14  | C21  | 114.6(3) | C31  | C30  | C33  | 124.2(4) |
| C16  | C15  | C14  | 123.0(3) | C30  | C31  | C32  | 121.2(4) |
| C15  | C16  | C17  | 119.4(3) | C27  | C32  | C31  | 120.2(3) |

| Atom | Atom | Atom | Angle/°  |
|------|------|------|----------|
| C34  | C33  | C30  | 110.6(4) |
| C34  | C33  | C35  | 107.2(5) |
| C35  | C33  | C30  | 110.7(4) |
| C36  | C33  | C30  | 109.5(4) |
| C36  | C33  | C34  | 111.0(4) |
| C36  | C33  | C35  | 107.8(5) |
| C38  | C37  | C23  | 121.2(3) |
| C42  | C37  | C23  | 121.3(3) |
| C42  | C37  | C38  | 117.3(3) |
| C39  | C38  | C37  | 121.2(3) |
| C38  | C39  | C40  | 122.0(3) |
| C39  | C40  | C41  | 116.5(3) |
| C39  | C40  | C43  | 121.7(3) |
| C41  | C40  | C43  | 121.6(3) |
| C40  | C41  | C42  | 121.6(3) |
| C37  | C42  | C41  | 121.1(3) |
| C40  | C43  | C45  | 112.7(3) |
| C40  | C43  | C46  | 106.7(3) |
| C44  | C43  | C40  | 112.0(3) |
| C44  | C43  | C45  | 108.4(4) |
| C44  | C43  | C46  | 109.4(3) |
| C46  | C43  | C45  | 107.4(4) |
| C48  | C47  | C24  | 120.6(3) |
| C52  | C47  | C24  | 121.5(3) |
| C52  | C47  | C48  | 117.8(3) |
| C49  | C48  | C47  | 120.6(3) |
| C48  | C49  | C50  | 122.1(3) |
| C49  | C50  | C53  | 120.1(3) |
| C51  | C50  | C49  | 116.7(3) |
| C51  | C50  | C53  | 123.0(3) |
| C52  | C51  | C50  | 121.7(3) |
| C51  | C52  | C47  | 121.0(3) |
| C50  | C53  | C55  | 111.8(4) |
| C50  | C53  | C56  | 108.9(4) |
| C54  | C53  | C50  | 110.7(3) |
| C54  | C53  | C55  | 108.6(4) |
| C54  | C53  | C56  | 108.6(4) |
| C55  | C53  | C56  | 108.2(4) |
| C58  | C57  | C25  | 121.3(3) |
| C62  | C57  | C25  | 121.3(3) |
| C62  | C57  | C58  | 117.2(3) |
| C59  | C58  | C57  | 121.5(3) |
| C58  | C59  | C60  | 121.3(3) |
| C59  | C60  | C63  | 120.3(3) |
| C61  | C60  | C59  | 117.1(3) |
| C61  | C60  | C63  | 122.5(3) |
| C62  | C61  | C60  | 121.2(3) |
| C57  | C62  | C61  | 121.6(3) |
| C60  | C63  | C66  | 110.6(3) |
| C64  | C63  | C60  | 112.9(3) |
| C64  | C63  | C65  | 108.5(4) |
| C64  | C63  | C66  | 107.4(3) |
| C65  | C63  | C60  | 107.7(3) |
| C65  | C63  | C66  | 109.8(4) |
| C68  | C67  | C26  | 122.1(3) |
| C68  | C67  | C72  | 118.0(3) |
| C72  | C67  | C26  | 119.9(3) |
| C69  | C68  | C67  | 121.0(3) |
| C70  | C69  | C68  | 121.5(3) |
| C69  | C70  | C71  | 117.3(3) |
| C69  | C70  | C73  | 123.6(4) |

| Atom | Atom | Atom | Angle/°   |
|------|------|------|-----------|
| C71  | C70  | C73  | 119.1(4)  |
| C72  | C71  | C70  | 121.5(3)  |
| C71  | C72  | C67  | 120.7(3)  |
| C70  | C73  | C74  | 111.3(4)  |
| C70  | C73  | C76  | 108.4(3)  |
| C75  | C73  | C70  | 110.0(4)  |
| C75  | C73  | C74  | 108.0(5)  |
| C75  | C73  | C76  | 112.4(5)  |
| C76  | C73  | C74  | 106.7(4)  |
| C78  | C77  | C20  | 119.2(3)  |
| C82  | C77  | C20  | 120.7(3)  |
| C82  | C77  | C78  | 120.1(3)  |
| C77  | C78  | C123 | 122.1(3)  |
| C79  | C78  | C77  | 120.0(3)  |
| C79  | C78  | C123 | 118.0(3)  |
| C78  | C79  | C113 | 120.4(3)  |
| C80  | C79  | C78  | 119.9(3)  |
| C80  | C79  | C113 | 119.7(3)  |
| C79  | C80  | C81  | 119.8(3)  |
| C79  | C80  | C103 | 121.0(3)  |
| C81  | C80  | C103 | 119.2(3)  |
| C80  | C81  | C93  | 118.7(3)  |
| C82  | C81  | C80  | 120.4(3)  |
| C82  | C81  | C93  | 120.9(3)  |
| C77  | C82  | C83  | 120.4(3)  |
| C81  | C82  | C77  | 119.5(3)  |
| C81  | C82  | C83  | 120.1(3)  |
| C84  | C83  | C82  | 122.1(3)  |
| C84  | C83  | C88  | 117.1(3)  |
| C88  | C83  | C82  | 120.8(3)  |
| C83  | C84  | C85  | 121.6(4)  |
| C84  | C85  | C86  | 121.1(4)  |
| C85  | C86  | C89  | 122.7(5)  |
| C87  | C86  | C85  | 116.9(4)  |
| C87  | C86  | C89  | 120.4(5)  |
| C88  | C87  | C86  | 121.5(4)  |
| C87  | C88  | C83  | 121.8(4)  |
| C86  | C89  | C90  | 105.9(8)  |
| C91  | C89  | C86  | 114.7(6)  |
| C91  | C89  | C90  | 96.1(8)   |
| C91  | C89  | C92  | 119.9(7)  |
| C92  | C89  | C86  | 113.2(6)  |
| C92  | C89  | C90  | 103.4(9)  |
| C94  | C93  | C81  | 121.8(3)  |
| C98  | C93  | C81  | 120.3(3)  |
| C98  | C93  | C94  | 117.8(4)  |
| C93  | C94  | C161 | 112.3(5)  |
| C95  | C94  | C93  | 126.4(6)  |
| C94  | C95  | C96  | 117.0(8)  |
| C95  | C96  | C99  | 121.3(9)  |
| C97  | C96  | C95  | 117.8(8)  |
| C97  | C96  | C99  | 120.8(9)  |
| C96  | C97  | C98  | 125.4(8)  |
| C93  | C98  | C97  | 113.7(5)  |
| C149 | C98  | C93  | 127.5(6)  |
| C100 | C99  | C96  | 110.8(10) |
| C100 | C99  | C101 | 119.8(16) |
| C100 | C99  | C102 | 94.5(17)  |
| C101 | C99  | C96  | 112.3(9)  |
| C102 | C99  | C96  | 110.1(12) |
| C102 | C99  | C101 | 107.7(17) |

| Atom | Atom | Atom | Angle/°   | Atom | Atom | Atom | Angle/°   |
|------|------|------|-----------|------|------|------|-----------|
| C104 | C103 | C80  | 123.2(3)  | C135 | C137 | C162 | 109.2(19) |
| C108 | C103 | C80  | 119.2(3)  | C162 | C137 | C134 | 111.2(11) |
| C108 | C103 | C104 | 117.6(3)  | C175 | C137 | C134 | 111.3(14) |
| C105 | C104 | C103 | 120.6(3)  | C175 | C137 | C135 | 109.8(19) |
| C104 | C105 | C106 | 122.2(4)  | C175 | C137 | C162 | 106.2(18) |
| C105 | C106 | C107 | 117.3(4)  | C139 | C138 | C136 | 114.8(6)  |
| C105 | C106 | C112 | 121.9(4)  | C140 | C139 | C138 | 111.2(8)  |
| C107 | C106 | C112 | 120.7(4)  | C139 | C140 | C141 | 117.1(7)  |
| C108 | C107 | C106 | 120.7(4)  | C140 | C141 | C142 | 115.1(7)  |
| C103 | C108 | C107 | 121.6(3)  | C143 | C142 | C141 | 110.9(11) |
| C106 | C112 | C110 | 107.0(6)  | C174 | C142 | C141 | 120.6(11) |
| C109 | C112 | C106 | 114.1(5)  | C142 | C143 | C144 | 132(2)    |
| C109 | C112 | C110 | 101.0(10) | C145 | C144 | C143 | 112.8(16) |
| C111 | C112 | C106 | 111.1(7)  | C144 | C145 | C146 | 114.2(12) |
| C111 | C112 | C109 | 115.3(10) | O148 | C147 | O149 | 123.4(3)  |
| C111 | C112 | C110 | 107.3(13) | O148 | C147 | C16  | 124.0(3)  |
| C114 | C113 | C79  | 121.7(3)  | O149 | C147 | C16  | 112.5(3)  |
| C118 | C113 | C79  | 120.8(3)  | C186 | C148 | C146 | 106.5(11) |
| C118 | C113 | C114 | 117.5(3)  | C134 | C149 | C98  | 117.4(9)  |
| C115 | C114 | C113 | 121.2(3)  | O149 | C150 | C151 | 107.8(3)  |
| C114 | C115 | C116 | 122.0(3)  | C150 | C151 | C152 | 112.5(4)  |
| C115 | C116 | C117 | 116.6(3)  | C153 | C152 | C151 | 115.8(4)  |
| C115 | C116 | C119 | 123.4(3)  | C152 | C153 | C154 | 116.7(4)  |
| C117 | C116 | C119 | 120.0(3)  | C155 | C154 | C153 | 118.4(5)  |
| C118 | C117 | C116 | 121.6(3)  | C154 | C155 | C156 | 118.6(5)  |
| C113 | C118 | C117 | 121.0(3)  | C157 | C156 | C155 | 117.9(5)  |
| C120 | C119 | C116 | 109.7(4)  | C156 | C157 | C158 | 119.1(6)  |
| C120 | C119 | C121 | 108.5(4)  | C159 | C158 | C157 | 120.3(8)  |
| C121 | C119 | C116 | 111.4(3)  | O161 | C160 | O162 | 124.4(4)  |
| C122 | C119 | C116 | 109.5(4)  | O161 | C160 | C3   | 123.4(4)  |
| C122 | C119 | C120 | 108.8(5)  | O162 | C160 | C3   | 112.3(3)  |
| C122 | C119 | C121 | 108.8(5)  | C134 | C161 | C94  | 125.0(9)  |
| C124 | C123 | C78  | 120.6(3)  | O162 | C163 | C164 | 106.6(4)  |
| C124 | C123 | C128 | 117.6(3)  | C163 | C164 | C165 | 115.1(4)  |
| C128 | C123 | C78  | 121.5(3)  | C166 | C165 | C164 | 114.5(4)  |
| C125 | C124 | C123 | 120.8(4)  | C165 | C166 | C167 | 113.9(4)  |
| C124 | C125 | C126 | 122.2(4)  | C168 | C167 | C166 | 112.8(4)  |
| C125 | C126 | C127 | 116.8(4)  | C169 | C168 | C167 | 114.6(4)  |
| C125 | C126 | C129 | 122.3(5)  | C168 | C169 | C170 | 114.0(4)  |
| C127 | C126 | C129 | 120.8(5)  | C171 | C170 | C169 | 113.5(4)  |
| C128 | C127 | C126 | 121.4(4)  | C170 | C171 | C172 | 113.4(4)  |
| C127 | C128 | C123 | 121.0(4)  | O174 | C173 | O175 | 123.2(4)  |
| C126 | C129 | C131 | 109.5(6)  | O174 | C173 | C5   | 125.1(4)  |
| C130 | C129 | C126 | 110.9(5)  | O175 | C173 | C5   | 111.5(3)  |
| C130 | C129 | C131 | 105.0(6)  | C142 | C174 | C186 | 105.2(12) |
| C130 | C129 | C132 | 116.3(7)  | C177 | C176 | O175 | 108.0(11) |
| C132 | C129 | C126 | 108.8(4)  | C176 | C177 | C178 | 111.5(16) |
| C132 | C129 | C131 | 106.0(6)  | C179 | C178 | C177 | 108.3(12) |
| O134 | C133 | O135 | 125.0(4)  | C178 | C179 | C180 | 112.7(13) |
| O134 | C133 | C18  | 123.7(4)  | C179 | C180 | C181 | 123.9(13) |
| O135 | C133 | C18  | 111.1(3)  | C182 | C181 | C180 | 97.0(14)  |
| C149 | C134 | C137 | 120.5(10) | C183 | C182 | C181 | 122.4(18) |
| C149 | C134 | C161 | 118.4(9)  | C184 | C183 | C182 | 137(2)    |
| C161 | C134 | C137 | 120.9(10) | C185 | C184 | C183 | 147.3(15) |
| O135 | C136 | C138 | 108.5(5)  | C148 | C186 | C174 | 105.8(13) |
| C135 | C137 | C134 | 109.1(11) |      |      |      |           |

**Table 12:** Torsion Angles in ° for 20Hir\_CD02\_2.

| Atom | Atom | Atom | Atom | Angle/° |
|------|------|------|------|---------|
|------|------|------|------|---------|

| Atom | Atom | Atom | Atom | Angle/°   |
|------|------|------|------|-----------|
| O135 | C136 | C138 | C139 | -171.7(6) |
| O149 | C150 | C151 | C152 | 175.4(4)  |
| O162 | C163 | C164 | C165 | -57.0(5)  |
| O175 | C176 | C177 | C178 | -59.1(18) |
| C1   | C2   | C3   | C4   | -0.7(6)   |
| C1   | C2   | C3   | C160 | -169.6(4) |
| C1   | C10  | C11  | C12  | -154.3(3) |
| C1   | C10  | C11  | C20  | 24.1(5)   |
| C2   | C1   | C10  | C9   | 2.1(5)    |
| C2   | C1   | C10  | C11  | -178.0(3) |
| C2   | C3   | C4   | C5   | 172.9(3)  |
| C2   | C3   | C4   | C9   | -8.2(5)   |
| C2   | C3   | C160 | O161 | -37.9(6)  |
| C2   | C3   | C160 | O162 | 140.8(4)  |
| C3   | C4   | C5   | C6   | 173.1(3)  |
| C3   | C4   | C5   | C173 | -17.9(6)  |
| C3   | C4   | C9   | C8   | -166.1(3) |
| C3   | C4   | C9   | C10  | 14.4(4)   |
| C4   | C3   | C160 | O161 | 153.9(4)  |
| C4   | C3   | C160 | O162 | -27.4(6)  |
| C4   | C5   | C6   | C7   | -2.6(5)   |
| C4   | C5   | C173 | O174 | 154.3(4)  |
| C4   | C5   | C173 | O175 | -29.6(6)  |
| C4   | C9   | C10  | C1   | -11.3(4)  |
| C4   | C9   | C10  | C11  | 168.7(3)  |
| C5   | C4   | C9   | C8   | 12.8(4)   |
| C5   | C4   | C9   | C10  | -166.7(3) |
| C5   | C6   | C7   | C8   | 4.1(5)    |
| C6   | C5   | C173 | O174 | -36.3(6)  |
| C6   | C5   | C173 | O175 | 139.8(4)  |
| C6   | C7   | C8   | C9   | 3.0(4)    |
| C6   | C7   | C8   | C13  | -175.2(3) |
| C7   | C8   | C9   | C4   | -11.4(4)  |
| C7   | C8   | C9   | C10  | 168.1(3)  |
| C7   | C8   | C13  | C12  | -158.1(3) |
| C7   | C8   | C13  | C14  | 21.9(4)   |
| C8   | C9   | C10  | C1   | 169.2(3)  |
| C8   | C9   | C10  | C11  | -10.8(4)  |
| C8   | C13  | C14  | C15  | -171.7(3) |
| C8   | C13  | C14  | C21  | 7.0(5)    |
| C9   | C4   | C5   | C6   | -5.8(5)   |
| C9   | C4   | C5   | C173 | 163.2(4)  |
| C9   | C8   | C13  | C12  | 23.7(4)   |
| C9   | C8   | C13  | C14  | -156.3(3) |
| C9   | C10  | C11  | C12  | 25.7(4)   |
| C9   | C10  | C11  | C20  | -155.9(3) |
| C10  | C1   | C2   | C3   | 3.9(6)    |
| C10  | C11  | C12  | C13  | -15.3(4)  |
| C10  | C11  | C12  | C17  | 166.2(3)  |
| C10  | C11  | C20  | C19  | -166.2(3) |
| C10  | C11  | C20  | C77  | 13.7(5)   |
| C11  | C12  | C13  | C8   | -8.9(4)   |
| C11  | C12  | C13  | C14  | 171.1(3)  |
| C11  | C12  | C17  | C16  | -178.3(3) |
| C11  | C12  | C17  | C18  | 0.4(4)    |
| C11  | C20  | C77  | C78  | 61.0(4)   |
| C11  | C20  | C77  | C82  | -120.4(3) |
| C12  | C11  | C20  | C19  | 12.2(4)   |
| C12  | C11  | C20  | C77  | -167.9(3) |
| C12  | C13  | C14  | C15  | 8.4(4)    |
| C12  | C13  | C14  | C21  | -173.0(3) |



| Atom | Atom | Atom | Atom | Angle/°   |
|------|------|------|------|-----------|
| C12  | C17  | C18  | C19  | 11.7(5)   |
| C12  | C17  | C18  | C133 | -159.8(4) |
| C13  | C8   | C9   | C4   | 166.8(3)  |
| C13  | C8   | C9   | C10  | -13.7(4)  |
| C13  | C12  | C17  | C16  | 3.2(4)    |
| C13  | C12  | C17  | C18  | -178.1(3) |
| C13  | C14  | C15  | C16  | 0.9(5)    |
| C13  | C14  | C21  | C22  | -118.3(3) |
| C13  | C14  | C21  | C26  | 68.6(4)   |
| C14  | C15  | C16  | C17  | -8.3(5)   |
| C14  | C15  | C16  | C147 | 160.5(3)  |
| C14  | C21  | C22  | C23  | -173.6(3) |
| C14  | C21  | C22  | C27  | 5.3(4)    |
| C14  | C21  | C26  | C25  | 174.2(3)  |
| C14  | C21  | C26  | C67  | -5.6(4)   |
| C15  | C14  | C21  | C22  | 60.4(4)   |
| C15  | C14  | C21  | C26  | -112.7(3) |
| C15  | C16  | C17  | C12  | 6.0(4)    |
| C15  | C16  | C17  | C18  | -172.6(3) |
| C15  | C16  | C147 | O148 | -136.6(4) |
| C15  | C16  | C147 | O149 | 39.2(4)   |
| C16  | C17  | C18  | C19  | -169.7(3) |
| C16  | C17  | C18  | C133 | 18.8(5)   |
| C17  | C12  | C13  | C8   | 169.7(3)  |
| C17  | C12  | C13  | C14  | -10.3(4)  |
| C17  | C16  | C147 | O148 | 32.0(5)   |
| C17  | C16  | C147 | O149 | -152.3(3) |
| C17  | C18  | C19  | C20  | -12.2(5)  |
| C17  | C18  | C133 | O134 | 33.9(7)   |
| C17  | C18  | C133 | O135 | -151.5(4) |
| C18  | C19  | C20  | C11  | 0.0(5)    |
| C18  | C19  | C20  | C77  | -179.9(3) |
| C19  | C18  | C133 | O134 | -137.6(4) |
| C19  | C18  | C133 | O135 | 36.9(6)   |
| C19  | C20  | C77  | C78  | -119.1(3) |
| C19  | C20  | C77  | C82  | 59.5(4)   |
| C20  | C11  | C12  | C13  | 166.2(3)  |
| C20  | C11  | C12  | C17  | -12.3(4)  |
| C20  | C77  | C78  | C79  | -177.1(3) |
| C20  | C77  | C78  | C123 | 3.5(4)    |
| C20  | C77  | C82  | C81  | 176.5(3)  |
| C20  | C77  | C82  | C83  | -2.9(4)   |
| C21  | C14  | C15  | C16  | -177.9(3) |
| C21  | C22  | C23  | C24  | -0.7(4)   |
| C21  | C22  | C23  | C37  | 178.9(3)  |
| C21  | C22  | C27  | C28  | 62.3(4)   |
| C21  | C22  | C27  | C32  | -107.8(4) |
| C21  | C26  | C67  | C68  | -111.2(4) |
| C21  | C26  | C67  | C72  | 66.3(4)   |
| C22  | C21  | C26  | C25  | 1.3(5)    |
| C22  | C21  | C26  | C67  | -178.5(3) |
| C22  | C23  | C24  | C25  | 1.4(4)    |
| C22  | C23  | C24  | C47  | -178.7(3) |
| C22  | C23  | C37  | C38  | 63.9(4)   |
| C22  | C23  | C37  | C42  | -121.3(3) |
| C22  | C27  | C28  | C29  | -165.4(3) |
| C22  | C27  | C32  | C31  | 163.4(3)  |
| C23  | C22  | C27  | C28  | -118.9(3) |
| C23  | C22  | C27  | C32  | 71.1(4)   |
| C23  | C24  | C25  | C26  | -0.7(5)   |
| C23  | C24  | C25  | C57  | 175.8(3)  |

| Atom | Atom | Atom | Atom | Angle/°   |
|------|------|------|------|-----------|
| C23  | C24  | C47  | C48  | 65.2(4)   |
| C23  | C24  | C47  | C52  | -113.0(4) |
| C23  | C37  | C38  | C39  | 170.7(3)  |
| C23  | C37  | C42  | C41  | -170.7(3) |
| C24  | C23  | C37  | C38  | -116.5(3) |
| C24  | C23  | C37  | C42  | 58.3(4)   |
| C24  | C25  | C26  | C21  | -0.6(4)   |
| C24  | C25  | C26  | C67  | 179.2(3)  |
| C24  | C25  | C57  | C58  | 63.0(4)   |
| C24  | C25  | C57  | C62  | -112.3(4) |
| C24  | C47  | C48  | C49  | -178.0(3) |
| C24  | C47  | C52  | C51  | 177.7(3)  |
| C25  | C24  | C47  | C48  | -114.9(3) |
| C25  | C24  | C47  | C52  | 66.9(4)   |
| C25  | C26  | C67  | C68  | 69.1(4)   |
| C25  | C26  | C67  | C72  | -113.4(3) |
| C25  | C57  | C58  | C59  | -173.3(3) |
| C25  | C57  | C62  | C61  | 173.3(3)  |
| C26  | C21  | C22  | C23  | -0.7(4)   |
| C26  | C21  | C22  | C27  | 178.2(3)  |
| C26  | C25  | C57  | C58  | -120.4(4) |
| C26  | C25  | C57  | C62  | 64.2(4)   |
| C26  | C67  | C68  | C69  | 174.7(3)  |
| C26  | C67  | C72  | C71  | -175.5(3) |
| C27  | C22  | C23  | C24  | -179.5(3) |
| C27  | C22  | C23  | C37  | 0.1(4)    |
| C27  | C28  | C29  | C30  | 1.3(6)    |
| C28  | C27  | C32  | C31  | -6.9(5)   |
| C28  | C29  | C30  | C31  | -5.7(7)   |
| C28  | C29  | C30  | C33  | 171.7(4)  |
| C29  | C30  | C31  | C32  | 3.7(7)    |
| C29  | C30  | C33  | C34  | -166.9(4) |
| C29  | C30  | C33  | C35  | -48.3(6)  |
| C29  | C30  | C33  | C36  | 70.4(6)   |
| C30  | C31  | C32  | C27  | 2.6(6)    |
| C31  | C30  | C33  | C34  | 10.3(7)   |
| C31  | C30  | C33  | C35  | 128.9(5)  |
| C31  | C30  | C33  | C36  | -112.4(5) |
| C32  | C27  | C28  | C29  | 5.1(5)    |
| C33  | C30  | C31  | C32  | -173.5(4) |
| C37  | C23  | C24  | C25  | -178.2(3) |
| C37  | C23  | C24  | C47  | 1.7(4)    |
| C37  | C38  | C39  | C40  | 0.2(6)    |
| C38  | C37  | C42  | C41  | 4.3(5)    |
| C38  | C39  | C40  | C41  | 3.8(5)    |
| C38  | C39  | C40  | C43  | -171.5(3) |
| C39  | C40  | C41  | C42  | -3.8(5)   |
| C39  | C40  | C43  | C44  | -32.5(5)  |
| C39  | C40  | C43  | C45  | -155.2(4) |
| C39  | C40  | C43  | C46  | 87.2(4)   |
| C40  | C41  | C42  | C37  | -0.2(5)   |
| C41  | C40  | C43  | C44  | 152.4(3)  |
| C41  | C40  | C43  | C45  | 29.8(5)   |
| C41  | C40  | C43  | C46  | -87.9(4)  |
| C42  | C37  | C38  | C39  | -4.3(5)   |
| C43  | C40  | C41  | C42  | 171.5(3)  |
| C47  | C24  | C25  | C26  | 179.3(3)  |
| C47  | C24  | C25  | C57  | -4.1(4)   |
| C47  | C48  | C49  | C50  | 1.1(6)    |
| C48  | C47  | C52  | C51  | -0.6(5)   |
| C48  | C49  | C50  | C51  | -1.9(6)   |

| Atom | Atom | Atom | Atom | Angle/°   |
|------|------|------|------|-----------|
| C48  | C49  | C50  | C53  | -177.5(4) |
| C49  | C50  | C51  | C52  | 1.6(6)    |
| C49  | C50  | C53  | C54  | -46.6(6)  |
| C49  | C50  | C53  | C55  | -167.9(4) |
| C49  | C50  | C53  | C56  | 72.6(5)   |
| C50  | C51  | C52  | C47  | -0.4(6)   |
| C51  | C50  | C53  | C54  | 138.1(5)  |
| C51  | C50  | C53  | C55  | 16.8(6)   |
| C51  | C50  | C53  | C56  | -102.7(5) |
| C52  | C47  | C48  | C49  | 0.2(5)    |
| C53  | C50  | C51  | C52  | 177.0(4)  |
| C57  | C25  | C26  | C21  | -177.1(3) |
| C57  | C25  | C26  | C67  | 2.6(4)    |
| C57  | C58  | C59  | C60  | 0.1(6)    |
| C58  | C57  | C62  | C61  | -2.2(5)   |
| C58  | C59  | C60  | C61  | -2.4(6)   |
| C58  | C59  | C60  | C63  | 173.9(4)  |
| C59  | C60  | C61  | C62  | 2.4(5)    |
| C59  | C60  | C63  | C64  | 165.9(4)  |
| C59  | C60  | C63  | C65  | -74.3(5)  |
| C59  | C60  | C63  | C66  | 45.6(5)   |
| C60  | C61  | C62  | C57  | 0.0(5)    |
| C61  | C60  | C63  | C64  | -17.9(5)  |
| C61  | C60  | C63  | C65  | 101.8(4)  |
| C61  | C60  | C63  | C66  | -138.3(4) |
| C62  | C57  | C58  | C59  | 2.2(6)    |
| C63  | C60  | C61  | C62  | -173.9(3) |
| C67  | C68  | C69  | C70  | 1.4(5)    |
| C68  | C67  | C72  | C71  | 2.2(5)    |
| C68  | C69  | C70  | C71  | 0.9(5)    |
| C68  | C69  | C70  | C73  | -178.7(3) |
| C69  | C70  | C71  | C72  | -1.6(5)   |
| C69  | C70  | C73  | C74  | 3.7(5)    |
| C69  | C70  | C73  | C75  | -116.0(6) |
| C69  | C70  | C73  | C76  | 120.8(5)  |
| C70  | C71  | C72  | C67  | 0.0(5)    |
| C71  | C70  | C73  | C74  | -175.9(4) |
| C71  | C70  | C73  | C75  | 64.4(6)   |
| C71  | C70  | C73  | C76  | -58.8(5)  |
| C72  | C67  | C68  | C69  | -2.9(5)   |
| C73  | C70  | C71  | C72  | 178.1(3)  |
| C77  | C78  | C79  | C80  | 1.1(4)    |
| C77  | C78  | C79  | C113 | -177.1(3) |
| C77  | C78  | C123 | C124 | -118.4(4) |
| C77  | C78  | C123 | C128 | 68.0(4)   |
| C77  | C82  | C83  | C84  | 62.1(5)   |
| C77  | C82  | C83  | C88  | -117.5(4) |
| C78  | C77  | C82  | C81  | -4.9(4)   |
| C78  | C77  | C82  | C83  | 175.6(3)  |
| C78  | C79  | C80  | C81  | -5.8(4)   |
| C78  | C79  | C80  | C103 | 172.0(3)  |
| C78  | C79  | C113 | C114 | -116.4(4) |
| C78  | C79  | C113 | C118 | 66.1(4)   |
| C78  | C123 | C124 | C125 | -169.6(3) |
| C78  | C123 | C128 | C127 | 169.2(3)  |
| C79  | C78  | C123 | C124 | 62.2(4)   |
| C79  | C78  | C123 | C128 | -111.4(4) |
| C79  | C80  | C81  | C82  | 5.1(5)    |
| C79  | C80  | C81  | C93  | -174.8(3) |
| C79  | C80  | C103 | C104 | 66.1(5)   |
| C79  | C80  | C103 | C108 | -112.7(4) |

| Atom | Atom | Atom | Atom | Angle/°    |
|------|------|------|------|------------|
| C79  | C113 | C114 | C115 | -174.7(3)  |
| C79  | C113 | C118 | C117 | 174.3(3)   |
| C80  | C79  | C113 | C114 | 65.4(4)    |
| C80  | C79  | C113 | C118 | -112.1(4)  |
| C80  | C81  | C82  | C77  | 0.3(5)     |
| C80  | C81  | C82  | C83  | 179.7(3)   |
| C80  | C81  | C93  | C94  | -117.2(4)  |
| C80  | C81  | C93  | C98  | 59.8(5)    |
| C80  | C103 | C104 | C105 | 179.1(4)   |
| C80  | C103 | C108 | C107 | -179.1(4)  |
| C81  | C80  | C103 | C104 | -116.1(4)  |
| C81  | C80  | C103 | C108 | 65.0(5)    |
| C81  | C82  | C83  | C84  | -117.3(4)  |
| C81  | C82  | C83  | C88  | 63.1(5)    |
| C81  | C93  | C94  | C95  | 160.1(7)   |
| C81  | C93  | C94  | C161 | -170.5(6)  |
| C81  | C93  | C98  | C97  | -167.8(6)  |
| C81  | C93  | C98  | C149 | 168.7(8)   |
| C82  | C77  | C78  | C79  | 4.3(4)     |
| C82  | C77  | C78  | C123 | -175.1(3)  |
| C82  | C81  | C93  | C94  | 62.9(5)    |
| C82  | C81  | C93  | C98  | -120.2(4)  |
| C82  | C83  | C84  | C85  | -179.5(5)  |
| C82  | C83  | C88  | C87  | 178.3(4)   |
| C83  | C84  | C85  | C86  | 1.2(9)     |
| C84  | C83  | C88  | C87  | -1.3(7)    |
| C84  | C85  | C86  | C87  | -1.3(11)   |
| C84  | C85  | C86  | C89  | 176.6(8)   |
| C85  | C86  | C87  | C88  | 0.1(11)    |
| C85  | C86  | C89  | C90  | -105.0(9)  |
| C85  | C86  | C89  | C91  | -0.4(15)   |
| C85  | C86  | C89  | C92  | 142.3(9)   |
| C86  | C87  | C88  | C83  | 1.2(9)     |
| C87  | C86  | C89  | C90  | 72.8(10)   |
| C87  | C86  | C89  | C91  | 177.5(8)   |
| C87  | C86  | C89  | C92  | -39.8(14)  |
| C88  | C83  | C84  | C85  | 0.1(7)     |
| C89  | C86  | C87  | C88  | -177.9(8)  |
| C93  | C81  | C82  | C77  | -179.8(3)  |
| C93  | C81  | C82  | C83  | -0.4(5)    |
| C93  | C94  | C95  | C96  | 12.0(14)   |
| C93  | C94  | C161 | C134 | -5.6(15)   |
| C93  | C98  | C149 | C134 | 5.8(16)    |
| C94  | C93  | C98  | C97  | 9.3(8)     |
| C94  | C93  | C98  | C149 | -14.2(10)  |
| C94  | C95  | C96  | C97  | -0.4(17)   |
| C94  | C95  | C96  | C99  | -177.1(10) |
| C95  | C96  | C97  | C98  | -5.8(19)   |
| C95  | C96  | C99  | C100 | 147.1(15)  |
| C95  | C96  | C99  | C101 | 10(2)      |
| C95  | C96  | C99  | C102 | -109.8(17) |
| C96  | C97  | C98  | C93  | 1.1(15)    |
| C97  | C96  | C99  | C100 | -29.6(19)  |
| C97  | C96  | C99  | C101 | -166.5(16) |
| C97  | C96  | C99  | C102 | 73.5(19)   |
| C98  | C93  | C94  | C95  | -16.9(9)   |
| C98  | C93  | C94  | C161 | 12.5(8)    |
| C99  | C96  | C97  | C98  | 171.0(11)  |
| C103 | C80  | C81  | C82  | -172.7(3)  |
| C103 | C80  | C81  | C93  | 7.4(4)     |
| C103 | C104 | C105 | C106 | 0.9(7)     |

| Atom | Atom | Atom | Atom | Angle/°    |
|------|------|------|------|------------|
| C104 | C103 | C108 | C107 | 2.0(6)     |
| C104 | C105 | C106 | C107 | 0.5(8)     |
| C104 | C105 | C106 | C112 | -176.5(6)  |
| C105 | C106 | C107 | C108 | -0.5(8)    |
| C105 | C106 | C112 | C109 | -160.1(8)  |
| C105 | C106 | C112 | C110 | -49.4(11)  |
| C105 | C106 | C112 | C111 | 67.5(14)   |
| C106 | C107 | C108 | C103 | -0.8(7)    |
| C107 | C106 | C112 | C109 | 23.1(11)   |
| C107 | C106 | C112 | C110 | 133.8(10)  |
| C107 | C106 | C112 | C111 | -109.4(13) |
| C108 | C103 | C104 | C105 | -2.1(6)    |
| C112 | C106 | C107 | C108 | 176.5(6)   |
| C113 | C79  | C80  | C81  | 172.5(3)   |
| C113 | C79  | C80  | C103 | -9.8(4)    |
| C113 | C114 | C115 | C116 | 0.4(6)     |
| C114 | C113 | C118 | C117 | -3.3(5)    |
| C114 | C115 | C116 | C117 | -3.1(6)    |
| C114 | C115 | C116 | C119 | 175.9(4)   |
| C115 | C116 | C117 | C118 | 2.7(5)     |
| C115 | C116 | C119 | C120 | 121.3(4)   |
| C115 | C116 | C119 | C121 | 1.0(6)     |
| C115 | C116 | C119 | C122 | -119.4(5)  |
| C116 | C117 | C118 | C113 | 0.5(5)     |
| C117 | C116 | C119 | C120 | -59.7(5)   |
| C117 | C116 | C119 | C121 | -179.9(4)  |
| C117 | C116 | C119 | C122 | 59.7(6)    |
| C118 | C113 | C114 | C115 | 2.9(5)     |
| C119 | C116 | C117 | C118 | -176.4(3)  |
| C123 | C78  | C79  | C80  | -179.5(3)  |
| C123 | C78  | C79  | C113 | 2.3(4)     |
| C123 | C124 | C125 | C126 | -0.3(6)    |
| C124 | C123 | C128 | C127 | -4.6(5)    |
| C124 | C125 | C126 | C127 | -3.5(6)    |
| C124 | C125 | C126 | C129 | 172.3(4)   |
| C125 | C126 | C127 | C128 | 3.2(6)     |
| C125 | C126 | C129 | C130 | 128.3(7)   |
| C125 | C126 | C129 | C131 | 12.9(7)    |
| C125 | C126 | C129 | C132 | -102.5(7)  |
| C126 | C127 | C128 | C123 | 0.8(6)     |
| C127 | C126 | C129 | C130 | -56.1(8)   |
| C127 | C126 | C129 | C131 | -171.5(5)  |
| C127 | C126 | C129 | C132 | 73.1(7)    |
| C128 | C123 | C124 | C125 | 4.3(5)     |
| C129 | C126 | C127 | C128 | -172.7(4)  |
| C133 | O135 | C136 | C138 | 160.9(5)   |
| C133 | C18  | C19  | C20  | 159.6(4)   |
| C136 | O135 | C133 | O134 | 7.5(8)     |
| C136 | O135 | C133 | C18  | -166.9(5)  |
| C136 | C138 | C139 | C140 | -173.8(6)  |
| C137 | C134 | C149 | C98  | 177.5(11)  |
| C137 | C134 | C161 | C94  | -177.2(11) |
| C138 | C139 | C140 | C141 | 73.8(10)   |
| C139 | C140 | C141 | C142 | -180.0(7)  |
| C140 | C141 | C142 | C143 | 177.2(15)  |
| C140 | C141 | C142 | C174 | -178.3(14) |
| C141 | C142 | C143 | C144 | -169(2)    |
| C141 | C142 | C174 | C186 | 172.9(11)  |
| C142 | C143 | C144 | C145 | -62(4)     |
| C142 | C174 | C186 | C148 | 169.1(15)  |
| C143 | C144 | C145 | C146 | 164.8(18)  |

| Atom | Atom | Atom | Atom | Angle/°    |
|------|------|------|------|------------|
| C146 | C148 | C186 | C174 | 171.9(13)  |
| C147 | O149 | C150 | C151 | -164.5(4)  |
| C147 | C16  | C17  | C12  | -162.5(3)  |
| C147 | C16  | C17  | C18  | 18.9(5)    |
| C149 | C134 | C137 | C135 | 147.5(16)  |
| C149 | C134 | C137 | C162 | 27(2)      |
| C149 | C134 | C137 | C175 | -91(2)     |
| C149 | C134 | C161 | C94  | -2(2)      |
| C150 | O149 | C147 | O148 | -2.9(5)    |
| C150 | O149 | C147 | C16  | -178.7(3)  |
| C150 | C151 | C152 | C153 | -174.9(5)  |
| C151 | C152 | C153 | C154 | 59.0(7)    |
| C152 | C153 | C154 | C155 | 177.0(6)   |
| C153 | C154 | C155 | C156 | -177.3(6)  |
| C154 | C155 | C156 | C157 | 178.7(7)   |
| C155 | C156 | C157 | C158 | -175.9(7)  |
| C156 | C157 | C158 | C159 | -174.8(9)  |
| C160 | O162 | C163 | C164 | -169.5(4)  |
| C160 | C3   | C4   | C5   | -19.4(6)   |
| C160 | C3   | C4   | C9   | 159.5(3)   |
| C161 | C134 | C137 | C135 | -37.7(19)  |
| C161 | C134 | C137 | C162 | -158.2(18) |
| C161 | C134 | C137 | C175 | 84(2)      |
| C161 | C134 | C149 | C98  | 2.5(19)    |
| C163 | O162 | C160 | O161 | 0.4(6)     |
| C163 | O162 | C160 | C3   | -178.3(3)  |
| C163 | C164 | C165 | C166 | -58.7(6)   |
| C164 | C165 | C166 | C167 | -175.8(4)  |
| C165 | C166 | C167 | C168 | -178.7(4)  |
| C166 | C167 | C168 | C169 | 175.4(4)   |
| C167 | C168 | C169 | C170 | -175.4(4)  |
| C168 | C169 | C170 | C171 | 176.8(4)   |
| C169 | C170 | C171 | C172 | -68.0(6)   |
| C173 | O175 | C176 | C177 | -175.3(12) |
| C173 | C5   | C6   | C7   | -172.6(3)  |
| C176 | O175 | C173 | O174 | -4.5(11)   |
| C176 | O175 | C173 | C5   | 179.3(10)  |
| C176 | C177 | C178 | C179 | -60.5(16)  |
| C177 | C178 | C179 | C180 | -164.1(12) |
| C178 | C179 | C180 | C181 | -168.5(13) |
| C179 | C180 | C181 | C182 | -76.6(15)  |
| C180 | C181 | C182 | C183 | -150.9(14) |
| C181 | C182 | C183 | C184 | -156(2)    |
| C182 | C183 | C184 | C185 | -125(4)    |

**Table 13:** Hydrogen Fractional Atomic Coordinates ( $\times 10^4$ ) and Equivalent Isotropic Displacement Parameters ( $\text{\AA}^2 \times 10^3$ ) for **20Hir\_CD02\_2**.  $U_{eq}$  is defined as 1/3 of the trace of the orthogonalised  $U_{ij}$ .

| Atom | x        | y       | z       | $U_{eq}$ |
|------|----------|---------|---------|----------|
| H1   | 9218.27  | 7268.09 | 2723.42 | 45       |
| H2   | 10324.52 | 7443.99 | 2261.44 | 50       |
| H6   | 7874.2   | 9343.07 | 1212.48 | 44       |
| H7   | 6653.99  | 8824.7  | 1475.21 | 40       |
| H15  | 4411.71  | 7358.08 | 1822.27 | 42       |
| H19  | 7107.52  | 7275.72 | 3694.69 | 48       |
| H28  | 5726.14  | 9445.94 | 2027.34 | 50       |
| H29  | 5408.21  | 9924.51 | 2813.48 | 65       |
| H31  | 2962.3   | 8832.45 | 2420.58 | 66       |
| H32  | 3242.68  | 8394.66 | 1611.62 | 52       |
| H34A | 2719.46  | 9340.88 | 3173.8  | 104      |

| Atom | x       | y        | z        | $U_{eq}$ |
|------|---------|----------|----------|----------|
| H34B | 3163.56 | 9406.78  | 3710.4   | 104      |
| H34C | 3248.56 | 8711.78  | 3270.2   | 104      |
| H35A | 4872.9  | 8949.47  | 3489.94  | 122      |
| H35B | 4766.6  | 9636.17  | 3931.04  | 122      |
| H35C | 5393.1  | 9738.37  | 3543.34  | 122      |
| H36A | 4583.39 | 10721.54 | 3343.56  | 121      |
| H36B | 4058.39 | 10643.04 | 3777.56  | 121      |
| H36C | 3546.59 | 10596.54 | 3259.46  | 121      |
| H38  | 4599.25 | 9932.96  | 1173.71  | 49       |
| H39  | 3694.06 | 10761.63 | 1012.82  | 53       |
| H41  | 1904.24 | 9063.65  | 196.82   | 47       |
| H42  | 2811.81 | 8229.48  | 357.3    | 47       |
| H44A | 2077.27 | 11249.03 | 1092.11  | 88       |
| H44B | 1934.67 | 11650.73 | 677.61   | 88       |
| H44C | 2889.87 | 11530.03 | 864.91   | 88       |
| H45A | 852.29  | 10654.42 | 206.43   | 103      |
| H45B | 962.19  | 10115.92 | 539.03   | 103      |
| H45C | 1079.29 | 9847.32  | -22.57   | 103      |
| H46A | 2204.8  | 11047.59 | -174.06  | 84       |
| H46B | 2382.7  | 10213.4  | -329.16  | 84       |
| H46C | 3127.5  | 10842.49 | -4.76    | 84       |
| H48  | 5000.66 | 9180.1   | 3.48     | 47       |
| H49  | 4442.86 | 9347.53  | -734.1   | 54       |
| H51  | 3121.48 | 7281.43  | -1148.27 | 60       |
| H52  | 3686.1  | 7101.29  | -414.43  | 53       |
| H54A | 3561.36 | 9615.55  | -1275.31 | 115      |
| H54B | 2605.66 | 9275.75  | -1231.31 | 115      |
| H54C | 2857.16 | 9303.55  | -1749.41 | 115      |
| H55A | 2128.37 | 7876.6   | -1605.09 | 116      |
| H55B | 2792.87 | 7395     | -1885.99 | 116      |
| H55C | 2386.87 | 7990.7   | -2103.49 | 116      |
| H56A | 3906.44 | 8457.58  | -2155.31 | 111      |
| H56B | 4352.84 | 7962.68  | -1862.01 | 111      |
| H56C | 4585.44 | 8835.68  | -1677.21 | 111      |
| H58  | 6212.28 | 7811.85  | -309.23  | 55       |
| H59  | 6438.59 | 7074.08  | -1065.87 | 54       |
| H61  | 5236.8  | 5279.92  | -767.36  | 50       |
| H62  | 5015.29 | 6025.11  | -9.28    | 46       |
| H64A | 6200.64 | 4663.95  | -1380.4  | 89       |
| H64B | 5825.94 | 4522.55  | -1938.9  | 89       |
| H64C | 5186.34 | 4646.35  | -1535.3  | 89       |
| H65A | 4633.92 | 5656.55  | -1823.44 | 105      |
| H65B | 5268.72 | 5549.45  | -2229.64 | 105      |
| H65C | 5287.52 | 6338.35  | -1852.84 | 105      |
| H66A | 6926.99 | 6329.84  | -1681.91 | 93       |
| H66B | 6895.09 | 5497.44  | -1997.81 | 93       |
| H66C | 7287.29 | 5745.64  | -1435.41 | 93       |
| H68  | 7325.63 | 7341.03  | 657.93   | 50       |
| H69  | 8290.25 | 6532.24  | 784.72   | 55       |
| H71  | 6372.21 | 5348.47  | 1222.9   | 56       |
| H72  | 5415.76 | 6168     | 1112.16  | 51       |
| H74A | 9024.74 | 5472.36  | 688.23   | 135      |
| H74B | 9399.54 | 5230.16  | 1148.33  | 135      |
| H74C | 9197.54 | 6051.06  | 1215.73  | 135      |
| H75A | 7143.22 | 4388.87  | 810.24   | 175      |
| H75B | 8108.02 | 4186.47  | 856.04   | 175      |
| H75C | 7781.62 | 4541.07  | 440.04   | 175      |
| H76A | 8322.95 | 5818.04  | 1870.25  | 114      |
| H76B | 8508.35 | 4985.54  | 1732.95  | 114      |
| H76C | 7533.05 | 5164.54  | 1731.85  | 114      |
| H84  | 8366.71 | 6138.48  | 2799.09  | 65       |

| <b>Atom</b> | <b>x</b> | <b>y</b> | <b>z</b> | <b><math>U_{eq}</math></b> |
|-------------|----------|----------|----------|----------------------------|
| H85         | 7581.02  | 4967.31  | 2640.27  | 94                         |
| H87         | 7573.33  | 5289.92  | 4096.33  | 89                         |
| H88         | 8393.33  | 6432.44  | 4249.04  | 59                         |
| H90A        | 5577.33  | 4639.11  | 3126.9   | 258                        |
| H90B        | 5865.83  | 4786.41  | 3696.11  | 258                        |
| H90C        | 5459.43  | 3981.31  | 3367.6   | 258                        |
| H91A        | 6291.77  | 3362.4   | 2726.49  | 148                        |
| H91B        | 7165.27  | 3731     | 2596.19  | 148                        |
| H91C        | 6309.37  | 4119     | 2590.19  | 148                        |
| H92A        | 6881.84  | 3317.22  | 3494.05  | 226                        |
| H92B        | 6944.84  | 4058.82  | 3924.65  | 226                        |
| H92C        | 7779.14  | 3855.02  | 3667.25  | 226                        |
| H94         | 10115.61 | 5975.81  | 3461.62  | 73                         |
| H94A        | 10379.79 | 6029.54  | 3439.5   | 73                         |
| H95         | 11157.54 | 5288.43  | 3635.46  | 77                         |
| H97         | 11233.27 | 6394.67  | 5049.12  | 77                         |
| H98A        | 10496.66 | 7369.06  | 4804.14  | 71                         |
| H98         | 10329.87 | 7271.9   | 4845.3   | 71                         |
| H10A        | 13059.43 | 6084.16  | 4879.4   | 250                        |
| H10B        | 12902.03 | 5445.76  | 5134.2   | 250                        |
| H10C        | 12286.63 | 6072.26  | 5200.3   | 250                        |
| H10D        | 11986.31 | 4407.51  | 3967.54  | 250                        |
| H10E        | 12950.61 | 4749.71  | 4223.94  | 250                        |
| H10F        | 12442.81 | 5135.01  | 3874.34  | 250                        |
| H10G        | 11313.84 | 5089.68  | 5047.59  | 250                        |
| H10H        | 12078.14 | 4599.38  | 4943.89  | 250                        |
| H10I        | 11211.54 | 4420.88  | 4563.69  | 250                        |
| H104        | 11172.44 | 8955.63  | 4901.58  | 59                         |
| H105        | 12623.76 | 9101.7   | 5233.18  | 69                         |
| H107        | 13155.46 | 7661.57  | 4006.25  | 72                         |
| H108        | 11692.4  | 7510.79  | 3670.87  | 59                         |
| H10J        | 14711.45 | 8623.13  | 4359.64  | 257                        |
| H10K        | 14399.55 | 7777.83  | 4302.24  | 257                        |
| H10L        | 15194.65 | 8216.23  | 4704.14  | 257                        |
| H11A        | 14988.53 | 9397.03  | 5158.01  | 368                        |
| H11B        | 14158.93 | 9486.03  | 5438.31  | 368                        |
| H11C        | 14122.43 | 9592.63  | 4906.81  | 368                        |
| H11D        | 14686.69 | 8146.3   | 5411.82  | 433                        |
| H11E        | 13789.09 | 7626.7   | 5185.82  | 433                        |
| H11F        | 13791.59 | 8422.9   | 5550.12  | 433                        |
| H114        | 11402.32 | 9253.93  | 3639.49  | 55                         |
| H115        | 12181.73 | 10427.97 | 3940.75  | 57                         |
| H117        | 10343.62 | 11057.25 | 4810.8   | 51                         |
| H118        | 9547.62  | 9878.99  | 4501.21  | 47                         |
| H12A        | 11734.69 | 12731.66 | 4681.73  | 125                        |
| H12B        | 10881.49 | 12269.26 | 4764.23  | 125                        |
| H12C        | 11150.99 | 12137.26 | 4231.23  | 125                        |
| H12D        | 13163.53 | 11415.66 | 4536.8   | 118                        |
| H12E        | 13053.63 | 12246.26 | 4563.3   | 118                        |
| H12F        | 12644.93 | 11599.86 | 4087.8   | 118                        |
| H12G        | 11600.89 | 11732.13 | 5360.26  | 136                        |
| H12H        | 12456.39 | 12271.83 | 5366.16  | 136                        |
| H12I        | 12495.09 | 11414.13 | 5275.36  | 136                        |
| H124        | 9542.21  | 9279.36  | 3013.48  | 57                         |
| H125        | 9092.31  | 10360.65 | 2909.33  | 73                         |
| H127        | 7213.51  | 10221.87 | 3769.47  | 65                         |
| H128        | 7653.15  | 9129.71  | 3871.36  | 53                         |
| H13A        | 6803.2   | 10852.47 | 2828.14  | 208                        |
| H13B        | 6812.6   | 11663.17 | 3174.44  | 208                        |
| H13C        | 6608.3   | 10971.17 | 3374.84  | 208                        |
| H13D        | 8189.18  | 11922.82 | 2887.82  | 206                        |



| Atom | x        | y        | z       | $U_{eq}$ |
|------|----------|----------|---------|----------|
| H13E | 8244.48  | 11085.72 | 2612.52 | 206      |
| H13F | 9010.58  | 11550.72 | 3024.82 | 206      |
| H13G | 8004.51  | 11621.9  | 4071.43 | 178      |
| H13H | 8108.81  | 12249.8  | 3803.93 | 178      |
| H13I | 8887.11  | 11788.3  | 3862.73 | 178      |
| H13J | 10094.44 | 4345.96  | 4442.48 | 250      |
| H13K | 10855.04 | 3975.16  | 4653.48 | 250      |
| H13L | 10932.24 | 4223.96  | 4172.28 | 250      |
| H13M | 5236.61  | 5779.81  | 3811.32 | 108      |
| H13N | 4598.38  | 6357.45  | 4019.59 | 108      |
| H13O | 6313.28  | 6421.7   | 4523.87 | 98       |
| H13P | 5589.36  | 6896.86  | 4738.4  | 98       |
| H13Q | 4746.54  | 5782.11  | 4769.33 | 127      |
| H13R | 5540.81  | 5353.53  | 4606.38 | 127      |
| H14A | 6418.04  | 6174.48  | 5303.32 | 136      |
| H14B | 5715.35  | 5592     | 5407.94 | 136      |
| H14C | 4826.69  | 6505.29  | 5640.7  | 104      |
| H14D | 5530.17  | 7088.73  | 5535.71 | 104      |
| H14E | 5796.47  | 6403.28  | 6300.28 | 159      |
| H14F | 6531.66  | 6957.14  | 6187.22 | 159      |
| H14G | 5842.37  | 6376.93  | 6274.72 | 159      |
| H14H | 6524.42  | 6976.11  | 6174.94 | 159      |
| H14I | 4944.53  | 7273.35  | 6490.49 | 159      |
| H14J | 5538.19  | 7817.35  | 6296.41 | 159      |
| H14K | 6490.38  | 8218.24  | 7078.32 | 159      |
| H14L | 5517.06  | 8368.02  | 7141.63 | 159      |
| H14M | 6101.84  | 7076.67  | 7292.56 | 132      |
| H14N | 5257.22  | 7412.6   | 7466.1  | 132      |
| H14R | 6975.67  | 7812.06  | 7909.88 | 190      |
| H14S | 6023.67  | 7566.06  | 8014.38 | 190      |
| H14T | 6424.27  | 8413.56  | 8186.28 | 190      |
| H14O | 7007.57  | 7898.96  | 7924.88 | 190      |
| H14P | 6177.17  | 7736.56  | 8178.28 | 190      |
| H14Q | 6321.57  | 8468.56  | 8014.08 | 190      |
| H14U | 5384.1   | 8071     | 7442.53 | 132      |
| H14V | 6304.34  | 8482.03  | 7392.13 | 132      |
| H149 | 10850.61 | 6505.5   | 5177.22 | 77       |
| H15A | 2594.39  | 7355.62  | 2751.3  | 74       |
| H15B | 2956.3   | 6739.25  | 2969.01 | 74       |
| H15C | 2360.06  | 5833.09  | 2218.52 | 74       |
| H15D | 1949.23  | 6457.04  | 2034.47 | 74       |
| H15E | 1482.69  | 6054     | 2873.64 | 67       |
| H15F | 1035.91  | 6621.05  | 2647.5  | 67       |
| H15G | 384.07   | 5675.13  | 1967.24 | 83       |
| H15H | 113.92   | 5518.18  | 2450.53 | 83       |
| H15I | 1346.68  | 4802.1   | 1900.06 | 99       |
| H15J | 1127.09  | 4662.39  | 2396.19 | 99       |
| H15K | -31.21   | 4252.78  | 1521.35 | 93       |
| H15L | -283.44  | 4138.46  | 2018.22 | 93       |
| H15M | 936.08   | 3368.15  | 1477.65 | 106      |
| H15N | 705.7    | 3261.15  | 1980.49 | 106      |
| H15O | -420.15  | 2842.84  | 1107.17 | 114      |
| H15P | -699.04  | 2775.86  | 1609.36 | 114      |
| H15Q | 541.63   | 1967.02  | 1139.23 | 125      |
| H15R | 176.64   | 1872.66  | 1615.46 | 125      |
| H15S | -928.07  | 1503.88  | 740.74  | 217      |
| H15T | -1037.37 | 1221.88  | 1207.14 | 217      |
| H15U | -323.37  | 939.88   | 868.94  | 217      |
| H161 | 10767.51 | 5094.85  | 3851.87 | 77       |
| H16A | 11194.64 | 5704.8   | 5499.08 | 250      |
| H16B | 11145.84 | 4847.3   | 5444.58 | 250      |

| Atom | x        | y        | z        | $U_{eq}$ |
|------|----------|----------|----------|----------|
| H16C | 10297.04 | 5175.7   | 5293.58  | 250      |
| H16D | 10974.66 | 7417.81  | 673.96   | 73       |
| H16E | 11276.98 | 8286.83  | 877.67   | 73       |
| H16F | 10739.93 | 7960.73  | 28.87    | 81       |
| H16G | 10170.44 | 8511.15  | 337.28   | 81       |
| H16H | 9042.61  | 7528.58  | 253.14   | 78       |
| H16I | 9241.69  | 7568.91  | -270.85  | 78       |
| H16J | 9808.68  | 6528.84  | 193.99   | 80       |
| H16K | 10081.48 | 6586.37  | -313.73  | 80       |
| H16L | 8310.68  | 6186.12  | -176.25  | 74       |
| H16M | 8595.71  | 6228.31  | -684.96  | 74       |
| H16N | 9374.47  | 5224.73  | -723.73  | 76       |
| H16O | 9169.05  | 5202.38  | -197.45  | 76       |
| H16P | 7907.12  | 4821.73  | -1048.96 | 73       |
| H16Q | 7657.83  | 4851.98  | -521.97  | 73       |
| H17A | 8693.79  | 3830.32  | -1040.06 | 76       |
| H17B | 8501.1   | 3875.17  | -500.85  | 76       |
| H17C | 7581.54  | 2891.18  | -1114.39 | 74       |
| H17D | 7155.2   | 3491.3   | -1317.35 | 74       |
| H17E | 7019.25  | 3332.61  | -366.21  | 111      |
| H17F | 6249.36  | 3069.51  | -810.31  | 111      |
| H17G | 6584.26  | 3924.31  | -574.91  | 111      |
| H17H | 4989.21  | 7301.18  | 6558.72  | 159      |
| H17I | 5762.99  | 7886.34  | 6506.63  | 159      |
| H17J | 12301.48 | 5177.64  | 4531.48  | 250      |
| H17K | 12269.29 | 4653.94  | 4878.18  | 250      |
| H17L | 12383.89 | 5524.04  | 5106.78  | 250      |
| H17M | 11146    | 9604.37  | 1241.22  | 250      |
| H17N | 10859.61 | 10354.02 | 1550.26  | 250      |
| H17O | 12241.65 | 10229.89 | 1862.93  | 250      |
| H17P | 11880.93 | 9459.28  | 1936.99  | 250      |
| H17Q | 10995.61 | 10114.63 | 2582.73  | 250      |
| H17R | 12001.87 | 10437.15 | 2751.25  | 250      |
| H17S | 10718.07 | 11087.34 | 2316.19  | 250      |
| H17T | 11725.32 | 11349.35 | 2325.36  | 250      |
| H18A | 11948.28 | 11762.59 | 3170.65  | 250      |
| H18B | 11017.86 | 11382.54 | 3206.78  | 250      |
| H18C | 10408.97 | 12485.36 | 2934.9   | 250      |
| H18D | 10897.47 | 12702.8  | 3487.05  | 250      |
| H18E | 12331.19 | 12723.48 | 3031.94  | 250      |
| H18F | 11697.07 | 12889.64 | 2622.1   | 250      |
| H18G | 11542.37 | 13943.35 | 3273.51  | 250      |
| H18H | 12419.84 | 13781.38 | 3511.76  | 250      |
| H18I | 12633.46 | 14041.81 | 2738.72  | 250      |
| H18J | 12044.16 | 14582.83 | 3008.04  | 250      |
| H18K | 13180.97 | 15168.94 | 3511.93  | 313      |
| H18L | 13146.27 | 15150.44 | 2953.43  | 313      |
| H18M | 13743.97 | 14653.74 | 3169.43  | 313      |
| H18N | 5932.72  | 6905     | 7138.92  | 159      |
| H18O | 6779.04  | 7355.31  | 7031.11  | 159      |

**Table 14:** Atomic Occupancies for all atoms that are not fully occupied in **20Hir\_CD02\_2**.

| Atom | Occupancy | Atom | Occupancy | Atom | Occupancy | Atom | Occupancy |
|------|-----------|------|-----------|------|-----------|------|-----------|
| H94  | 0.523(5)  | H97  | 0.523(5)  | H10B | 0.523(5)  | C102 | 0.523(5)  |
| H94A | 0.477(5)  | H98A | 0.477(5)  | H10C | 0.523(5)  | H10G | 0.523(5)  |
| C95  | 0.523(5)  | H98  | 0.523(5)  | C101 | 0.523(5)  | H10H | 0.523(5)  |
| H95  | 0.523(5)  | C99  | 0.523(5)  | H10D | 0.523(5)  | H10I | 0.523(5)  |
| C96  | 0.523(5)  | C100 | 0.523(5)  | H10E | 0.523(5)  | C134 | 0.477(5)  |
| C97  | 0.523(5)  | H10A | 0.523(5)  | H10F | 0.523(5)  | C135 | 0.477(5)  |

| <b>Atom</b> | <b>Occupancy</b> |
|-------------|------------------|
| H13J        | 0.477(5)         |
| H13K        | 0.477(5)         |
| H13L        | 0.477(5)         |
| C137        | 0.477(5)         |
| H14E        | 0.447(9)         |
| H14F        | 0.447(9)         |
| H14G        | 0.553(9)         |
| H14H        | 0.553(9)         |
| C143        | 0.447(9)         |
| H14I        | 0.447(9)         |
| H14J        | 0.447(9)         |
| C144        | 0.447(9)         |
| H14K        | 0.447(9)         |
| H14L        | 0.447(9)         |
| C145        | 0.447(9)         |
| H14M        | 0.447(9)         |
| H14N        | 0.447(9)         |
| H14R        | 0.553(9)         |
| H14S        | 0.553(9)         |
| H14T        | 0.553(9)         |
| H14O        | 0.447(9)         |
| H14P        | 0.447(9)         |
| H14Q        | 0.447(9)         |
| C148        | 0.553(9)         |
| H14U        | 0.553(9)         |
| H14V        | 0.553(9)         |
| C149        | 0.477(5)         |
| H149        | 0.477(5)         |
| C161        | 0.477(5)         |
| H161        | 0.477(5)         |
| C162        | 0.477(5)         |
| H16A        | 0.477(5)         |
| H16B        | 0.477(5)         |
| H16C        | 0.477(5)         |
| C174        | 0.553(9)         |
| H17H        | 0.553(9)         |
| H17I        | 0.553(9)         |
| C175        | 0.477(5)         |
| H17J        | 0.477(5)         |
| H17K        | 0.477(5)         |
| H17L        | 0.477(5)         |
| C186        | 0.553(9)         |
| H18N        | 0.553(9)         |
| H18O        | 0.553(9)         |

## Citations

CrysAlisPro (ROD), Rigaku Oxford Diffraction, Poland (?).

CrysAlisPro Software System, Rigaku Oxford Diffraction, (2019).

O.V. Dolomanov and L.J. Bourhis and R.J. Gildea and J.A.K. Howard and H. Puschmann, Olex2: A complete structure solution, refinement and analysis program, *J. Appl. Cryst.*, (2009), **42**, 339-341.

Sheldrick, G.M., Crystal structure refinement with ShelXL, *Acta Cryst.*, (2015), **C71**, 3-8.

Sheldrick, G.M., ShelXT-Integrated space-group and crystal-structure determination, *Acta Cryst.*, (2015), **A71**, 3-8.

## S6. References

[1] Y. Lin, Q. Song, *Eur. J. Org. Chem.* **2016**, 2016, 3056–3059.

[2] M. M. Martin, D. Lungerich, P. Haines, F. Hampel, N. Jux, *Angew. Chem. Int. Ed.* **2019**, *58*, 8932–8937.

[3] D. Reger, P. Haines, F. W. Heinemann, D. M. Guldi, N. Jux, *Angew. Chem. Int. Ed.* **2018**, *57*, 5938–5942.

[4] T. Heek, J. Nikolaus, R. Schwarzer, C. Fasting, P. Welker, K. Licha, A. Herrmann, R. Haag, *Bioconjug. Chem.* **2013**, *24*, 153–158.
